# Supplementary material for: Comprehensive evaluation of structural variation detection algorithms for whole genome sequencing
Source: PubMed Central journal article supplement (PMC6547561; doi:10.1186/s13059-019-1720-5), 2019-06-03
Supplement: 13059_2019_1720_MOESM1_ESM.pdf [file 13059_2019_1720_MOESM1_ESM.pdf]

## **Table of contents in Additional file 1**

**Figure S1** – Outline of evaluation process for the performances of SV detection algorithms.

**Figure S2** – Changes of precision and recall depending on the threshold number of reads supporting the called SVs for filtering.

**Figure S3** – Precision and recall of DELs called using existing algorithms with the simulated and the NA12878 real data.

**Figure S4** – Precision and recall of DUPs called using existing algorithms with the simulated and the NA12878 real data.

**Figure S5** – Precision and recall of INs and INVs called using existing algorithms with the simulated and the NA12878 real data.

**Figure S6** – Precision and recall of called SVs based on SV calling methods.

**Figure S7** – Mean precision and Mendelian inheritance error rate for SV detection algorithms.

**Figure S8** – SV type-specificity of SV detection algorithms, determined with the HG00514 real data.

**Figure S9** – Size range-specificity of SV detection algorithms for DELs and DUPs, determined with the HG00514 real data.

**Figure S10** – Precision and recall of DELs called using existing algorithms with the HG00514 real data.

**Figure S11** – Precision and recall of DUPs and INs called using existing algorithms with the HG00514 real data.

**Figure S12** – Spearman's rank correlation of SV detection accuracy between the datasets.

**Figure S14** – Precision and recall of genotypes called with the simulated data.

**Figure S15** – Recall and precision of SVs commonly called between a pair of SV detection algorithms for the DEL-SS category.

**Figure S16** – Recall and precision of SVs commonly called between a pair of SV detection algorithms for the DEL-S category.

**Figure S17** – Recall and precision of SVs commonly called between a pair of SV detection algorithms for the DEL-M category.

**Figure S18** – Recall and precision of SVs commonly called between a pair of SV detection algorithms for the DEL-L category.

**Figure S19** – Recall and precision of SVs commonly called between a pair of SV detection algorithms for the DUP-S category.

**Figure S20** – Recall and precision of SVs commonly called between a pair of SV detection algorithms for the DUP-M category.

**Figure S21** – Recall and precision of SVs commonly called between a pair of SV detection algorithms for the DUP-L category.

**Figure S22** – Recall and precision of SVs commonly called between a pair of SV detection algorithms for the INV category.

**Figure S23** – Mean precision and recall of overlapped calls between SV detection algorithms.

**Table S1** – SV detection algorithms used in this study.

**Table S2** – List of algorithms that did not work in our computational environment.

**Table S3** – Whole genome sequencing reads used in this study.

**Table S4** – Components of reference SVs for real and simulated datasets.

**Table S12** – Effect of the length, insert size, and coverage of reads on precision and recall of SV detection algorithms (summarized data of Additional file 2: Figure S13).

**Table S13** – Mean coefficient of variation of SV detection accuracy for each category of SV type and read property

**Table S15** – Genotyping precision of SV detection algorithms.

**Table S19** – Extended list of algorithms exhibiting good SV calling results in both the simulated and the NA12878 real datasets.

**Table S20** – List of poor performing algorithms that cannot be recommended for SV detection with human WGS data.

**Supplementary references** – References cited in Tables S1, S2, and S4.

## (a) Evaluation for each algorithm

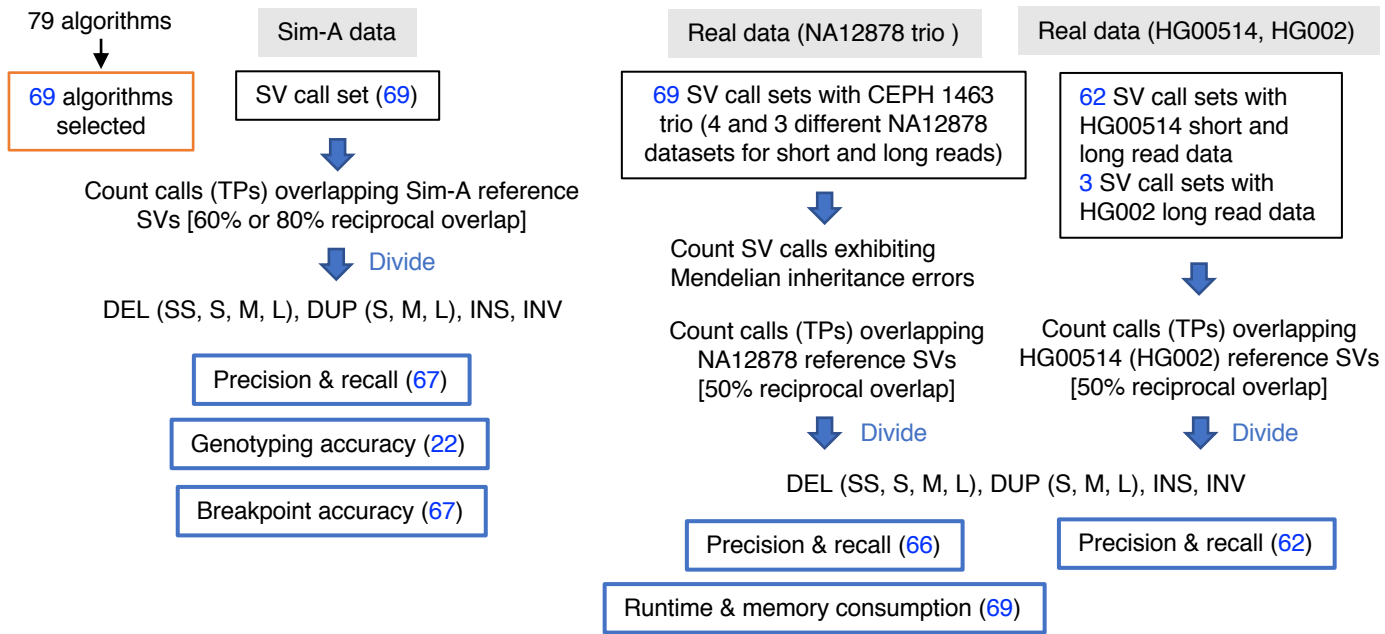

## (b) Evaluation for overlap calls from pairs of algorithms

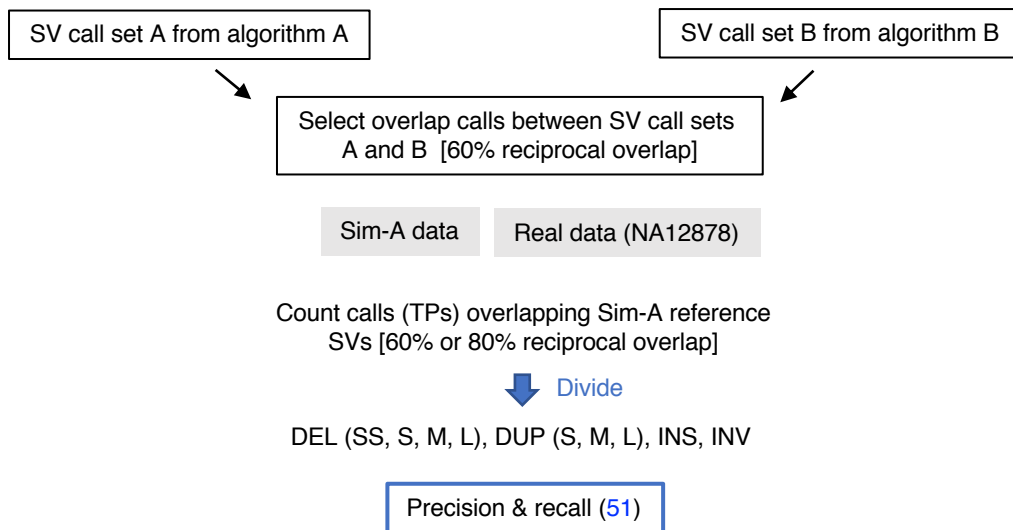

### Figure S1. Outline of evaluation process for the performances of SV detection algorithms.

Simulated data (Sim-A) and real datasets consisting of NA12878 trio, HG00514, and HG002 datasets were used for evaluation of the performance of single algorithm (a) and overlap calls from pairs of algorithms (b). For real data, Mendelian inheritance errors that were called only for the child NA12878 but not for the parents NA12891 and NA12892 were counted for each SV type for each algorithm. The mean precision, recall, and Mendelian error rates from four distinct NA12878 child datasets derived from different sequencing libraries were determined. For long read-based algorithms, the mean precision and recall values from three distinct NA12878 long read datasets were determined. In addition, each SV detection algorithm was also evaluated with HG00514 real datasets of short and long reads. The number of algorithms used in each analysis is indicated in blue. For evaluation for single algorithm, 69 algorithms, containing 2 genotype calling algorithms, were selected from available 79 algorithms. For evaluation of overlap calls, 51 algorithms out of the 69 algorithms were selected.

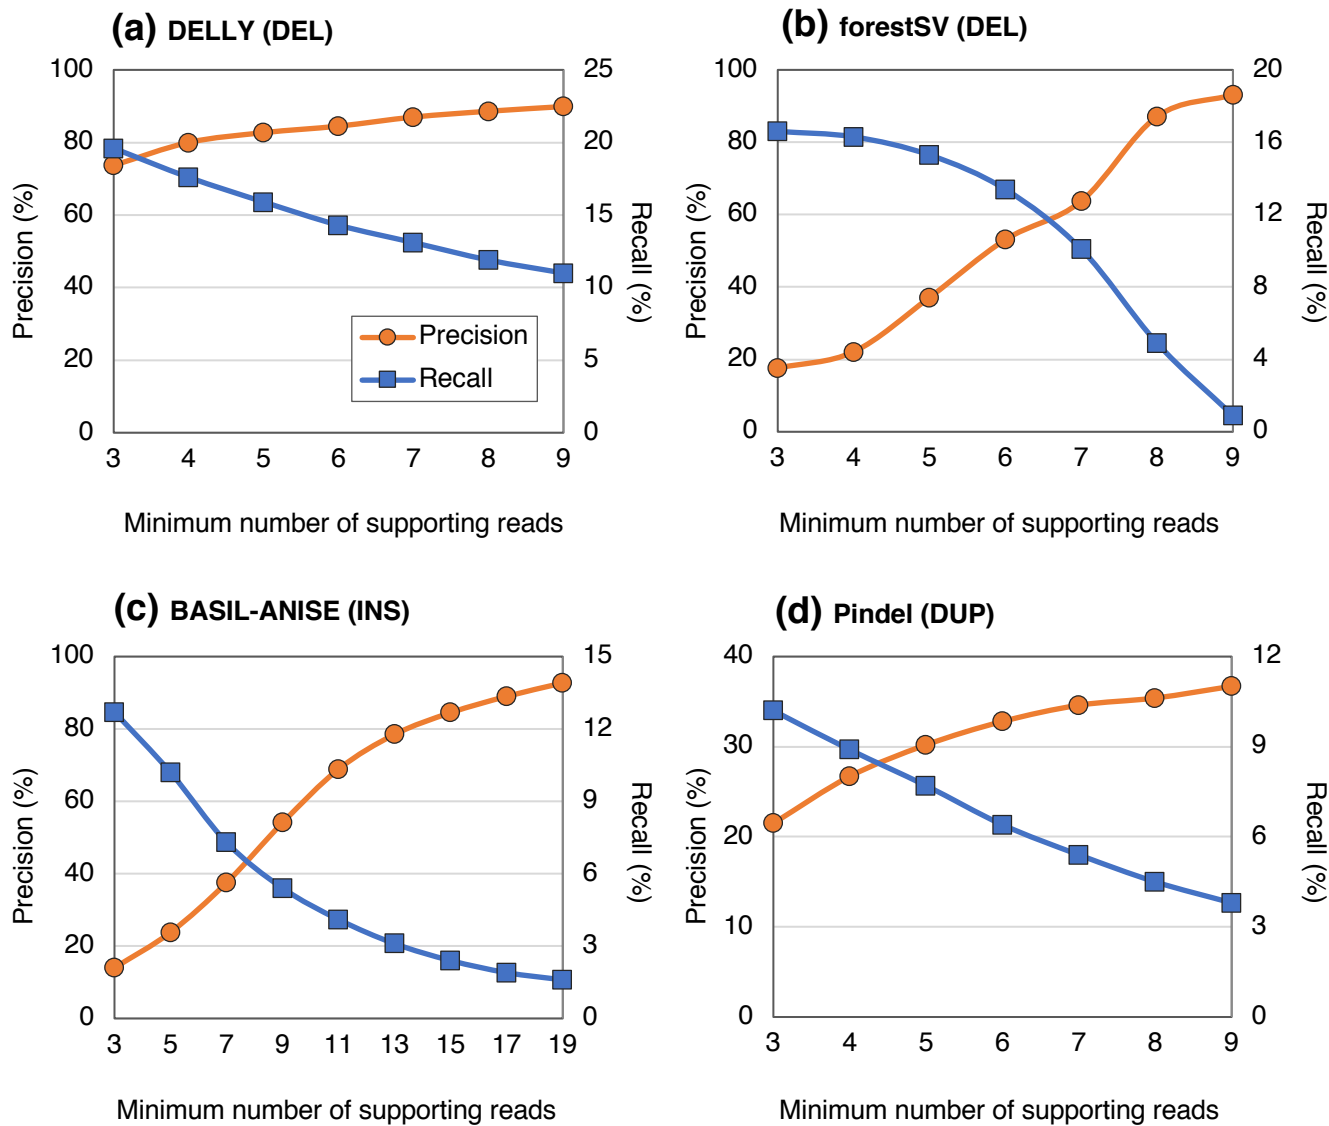

**Figure S2. Changes in precision and recall depending on the threshold number of reads supporting the called SVs for filtering.** (a) DELs called using DELLY with the NA12878 read data. (b) DELs called using forestSV with the NA12878 read data. (c) INSs called using BASIL-ANISE with the NA12878 read data. (d) DUPs called using Pindel with the NA12878 read data. Precision and recall percentages of the called SVs are indicated with the scales at the left and right sides on the y-axis, respectively, which were plotted against the minimum number of reads supporting the called SVs, indicated on the x-axis. As SVs with a lower number of supporting reads than the minimum number of supporting reads are removed, the minimum number of supporting reads functions as a filtering classifier to increase precision, despite decreasing recall.

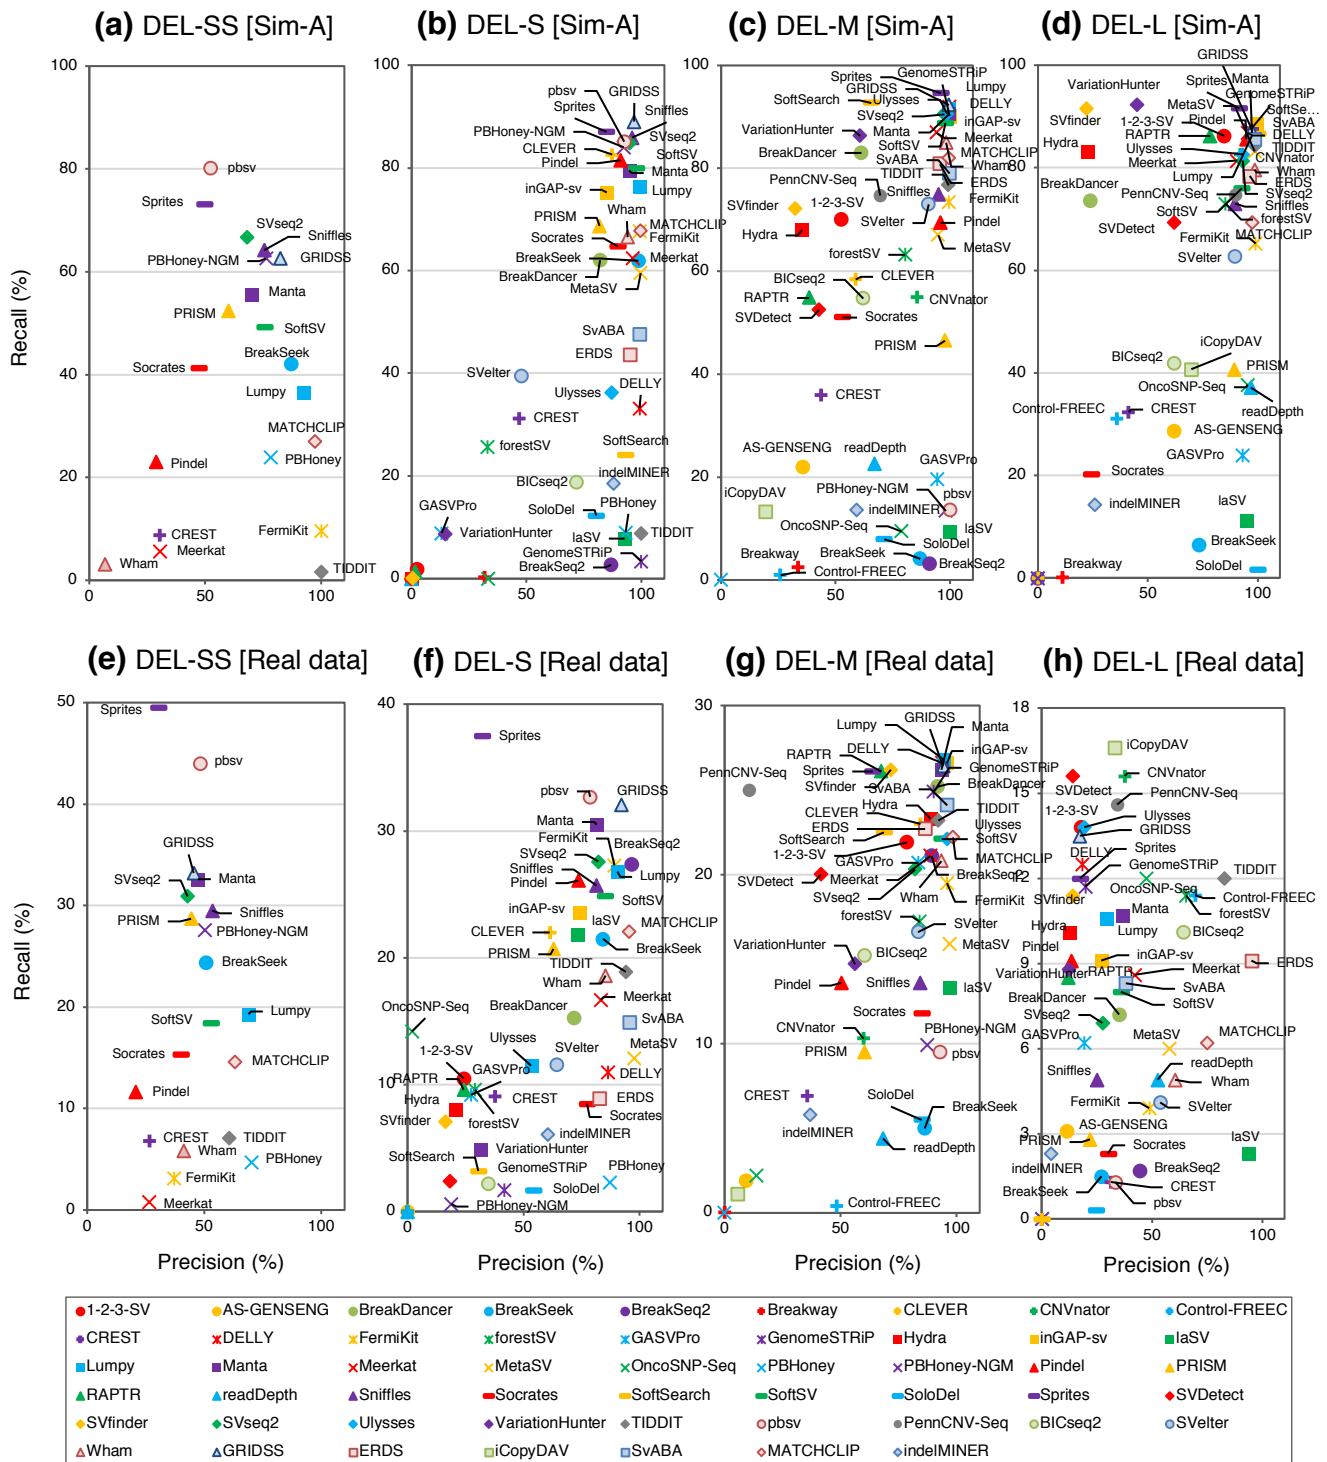

**Figure S3. Precision and recall of DELs called using existing algorithms with the simulated and the NA12878 real data.** DELs were called with the indicated algorithms and the simulated data (a-d) and the real data (e-h). DELs were categorized into four sets depending on the size-ranges; SS: 50–100 bp (a,e), S: 100 bp–1 Kb (b,f), M: 1 Kb–100 Kb (c,g), L: 100 Kb–1 Mb (d,h). The precision and recall percentages determined for the respective DEL call sets are indicated with the scales on the x-axis and y-axis, respectively. For the real data the mean values of the results obtained with the four NA12878 real datasets (data1 to data4) are indicated. Tools exhibiting a higher precision and a higher recall are placed toward the upper right corner.

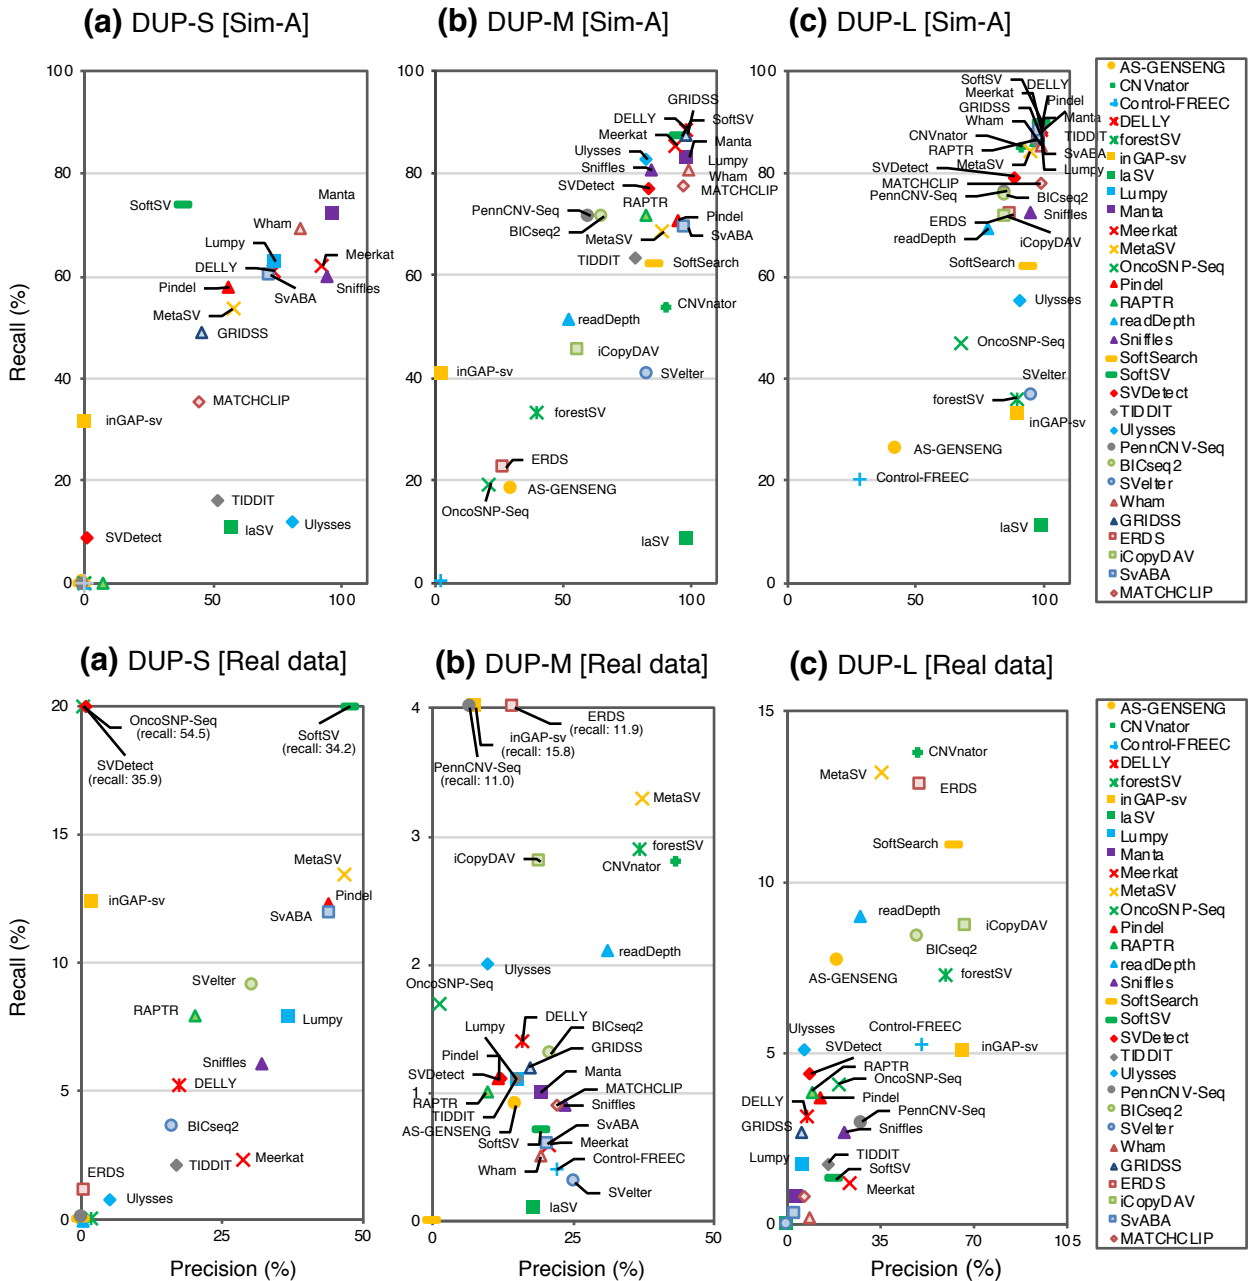

**Figure S4. Precision and recall of DUPs called using existing algorithms with the simulated and the NA12878 real data.** DUPs were called using the indicated algorithms and the simulated data (a-c) and the four NA12878 real datasets (d-f). DUPs were categorized into three sets depending on the size-ranges; S: 50 bp–1 Kb (a,d), M: 1 Kb–100 Kb (b,e), L: 100 Kb–1 Mb (c,f). The precision and recall percentages are indicated as in Figure S3.



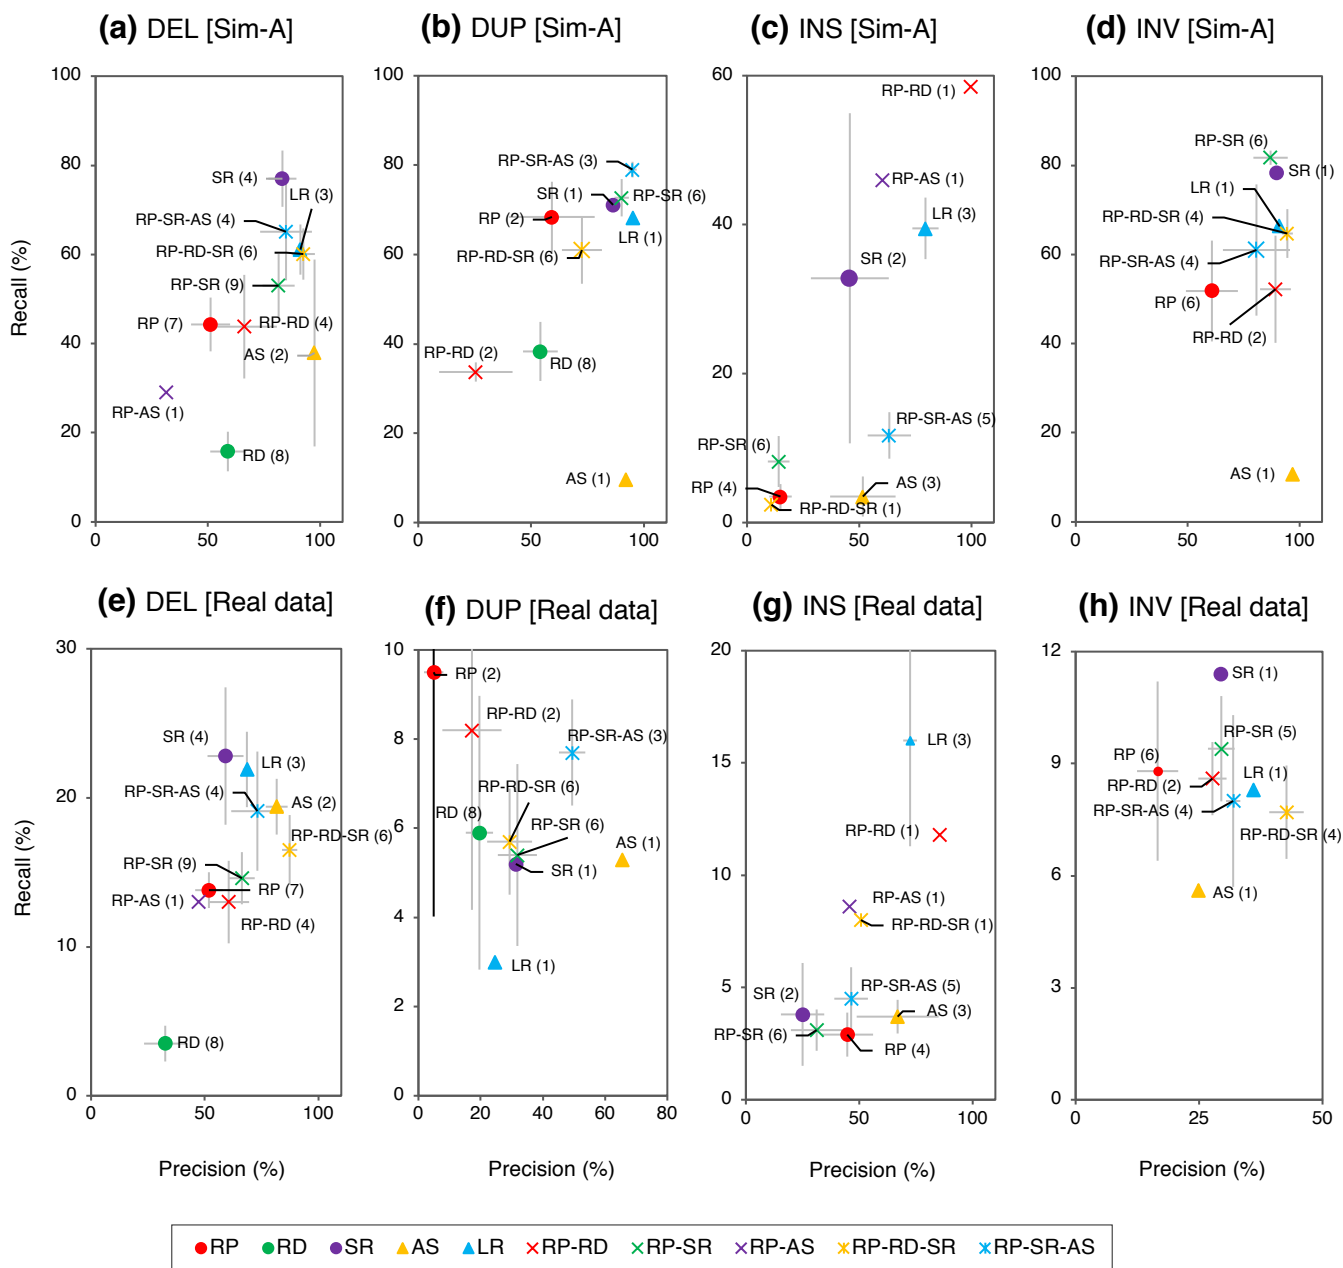

**Figure S6. Precision and recall of called SVs based on SV calling methods.** Precision and recall of DELs (a,e), DUPs (b,f), INSs (c,g), and INVs (d,h) were determined with the simulated data (a–d) and real data (e–h) using the algorithms indicated in Table S1 in Additional file 1. For the real data the mean values of the results obtained with the four (or three) NA12878 real datasets (data1 to data4) are indicated. The algorithms were categorized by the 10 methods: RP: read pair, RD: read pair, SR: split read, AS: assembly, LR: long read, RP-RD, RP-SR, RP-AS, RP-RD-SR, and RP-SR-AS. The hyphenated tools are combinations of RD, RD, SR, and AS. MetaSV was categorized into the RP-RD-SR method, and the data for BreakSeq2, which did not meet the criteria for these methods, was not used. The means of the precision and recall percentages of the algorithms categorized for each method are indicated with the scales on the x-axis and y-axis, respectively. The number of tools used for taking the means is indicated in parentheses for each symbol. The standard errors for precision and recall for each method are indicated with bars in light gray. Methods exhibiting a higher precision and a higher recall are placed toward the upper right corner.



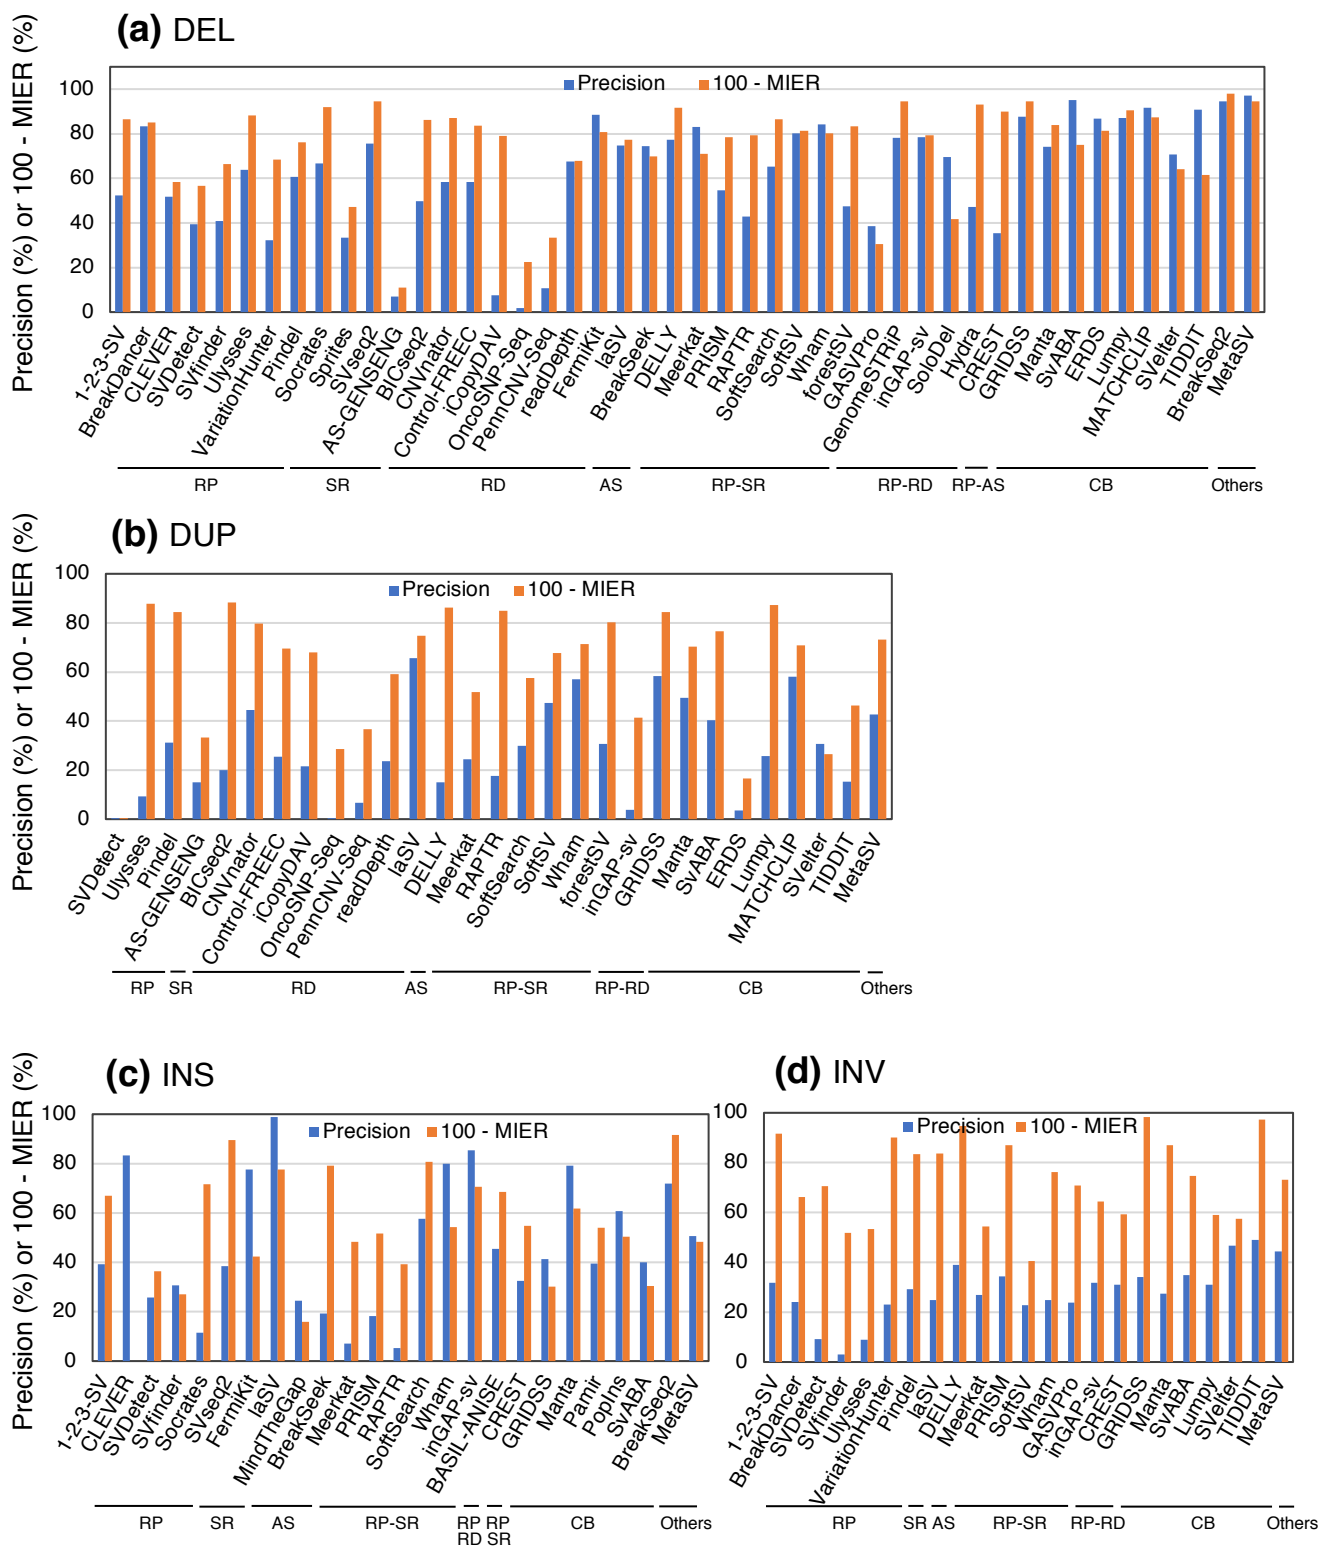

**Figure S7. Mean precision and Mendelian inheritance error rate for SV detection algorithms.** Mean precision and Mendelian inheritance error rates (MIER) of SV detection algorithms were determined for the different SV types, DEL (a), DUP (b), INS (c), and INV (d), using four sets of NA12878 real data. MIER is the percentage of Mendelian inheritance errors, which are the number of sites called only for NA12878 but not for the parents NA12891 and NA12892, in the number of the calls for the respective SV type. The mean precision and 100 – MIER are indicated with blue and orange bars, respectively. The algorithms were categorized according to the methods used to detect SV signals (RP: read pairs, SR: split reads, RD: read depth, AS: assembly, LR: long reads, and CB: their combined methods). The numerical data, including those for the other SV categories, are presented in Tables S6–S10 in Additional file 3.

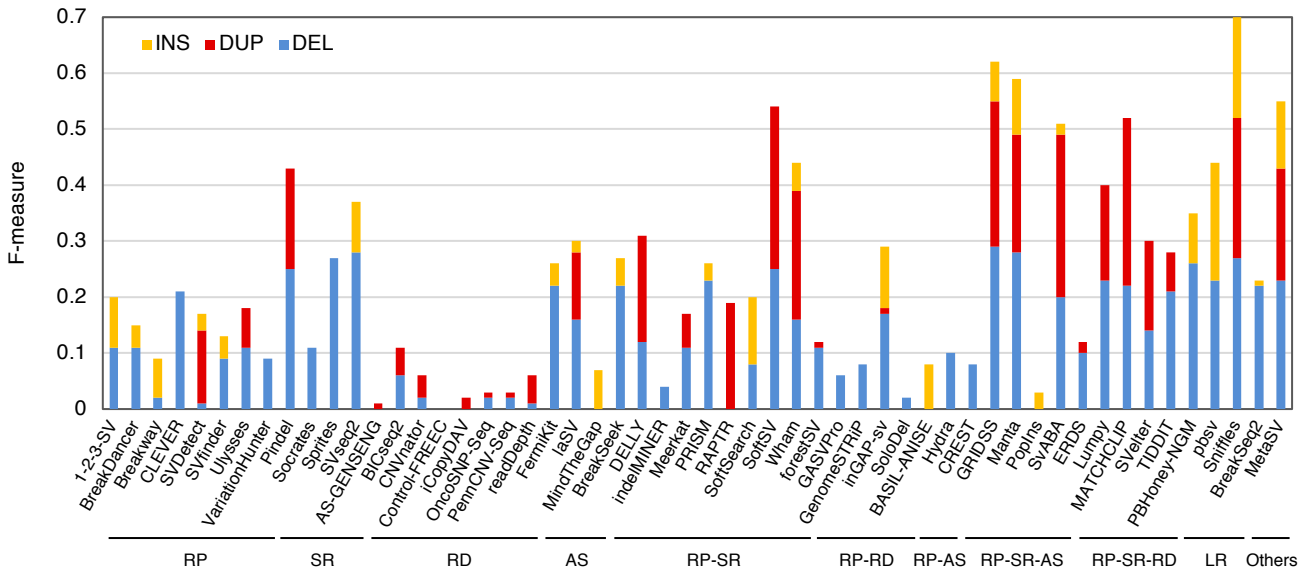

**Figure S8. SV type-specificity of SV detection algorithms, determined with the HG00514 real data.** Precision and recall of DELs, DUPs, and INSs were determined with the HG00514 real data. Modified F-measures (the combined statistics for precision and recall (see Methods for details)), are shown for the algorithms indicated with blue (for DEL), red (for DUP), and orange (for INS) bars. The algorithms were categorized according to the methods used to detect SV signals (RP: read pairs, SR: split reads, RD: read depth, AS: assembly, LR: long reads) and their combined methods (RP-SR, RP-RD, RP-AS, RP-SR-AS, and RP-SR-RD).

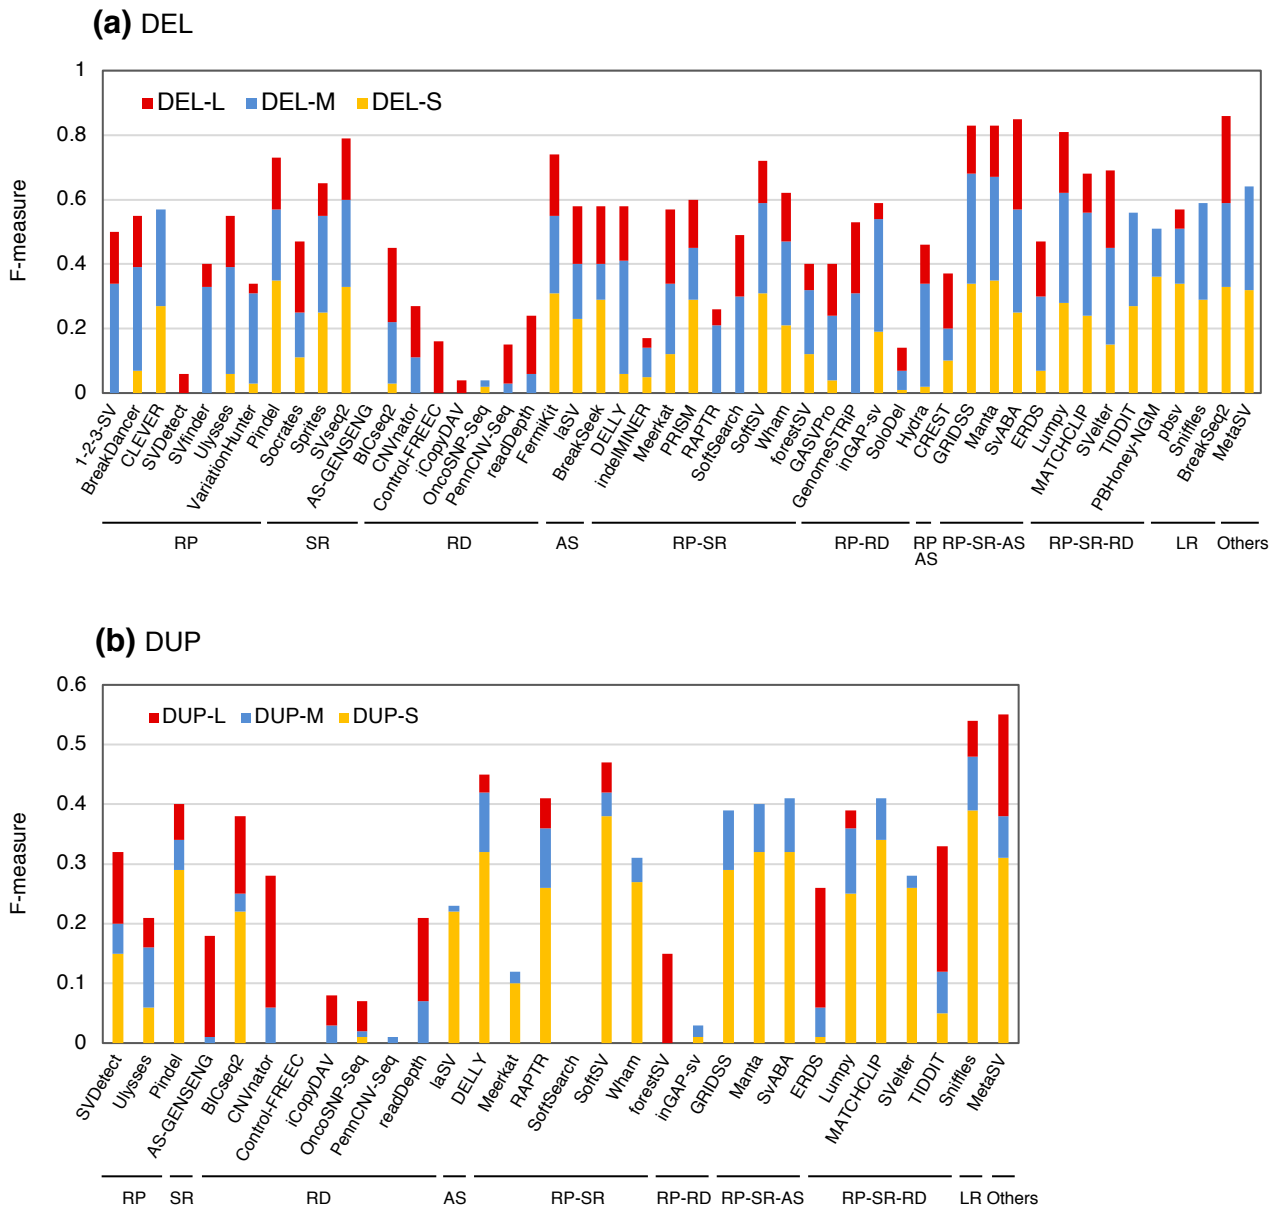

**Figure S9. Size range-specificity of SV detection algorithms for DELs and DUPs, determined with the HG00514 real data.** Precision and recall of each size range of DELs (a,b) and DUPs (c,d) were determined with the HG00514 real data. Modified F-measures (the combined statistics for precision and recall) are shown for the algorithms indicated with orange (for S: 100 bp–1 Kb), blue (for M: 1 Kb–100 Kb), and red (for L: 100 Kb–1 Mb) bars. The algorithms were categorized according to the methods used to detect SV signals, as in Figure S8.

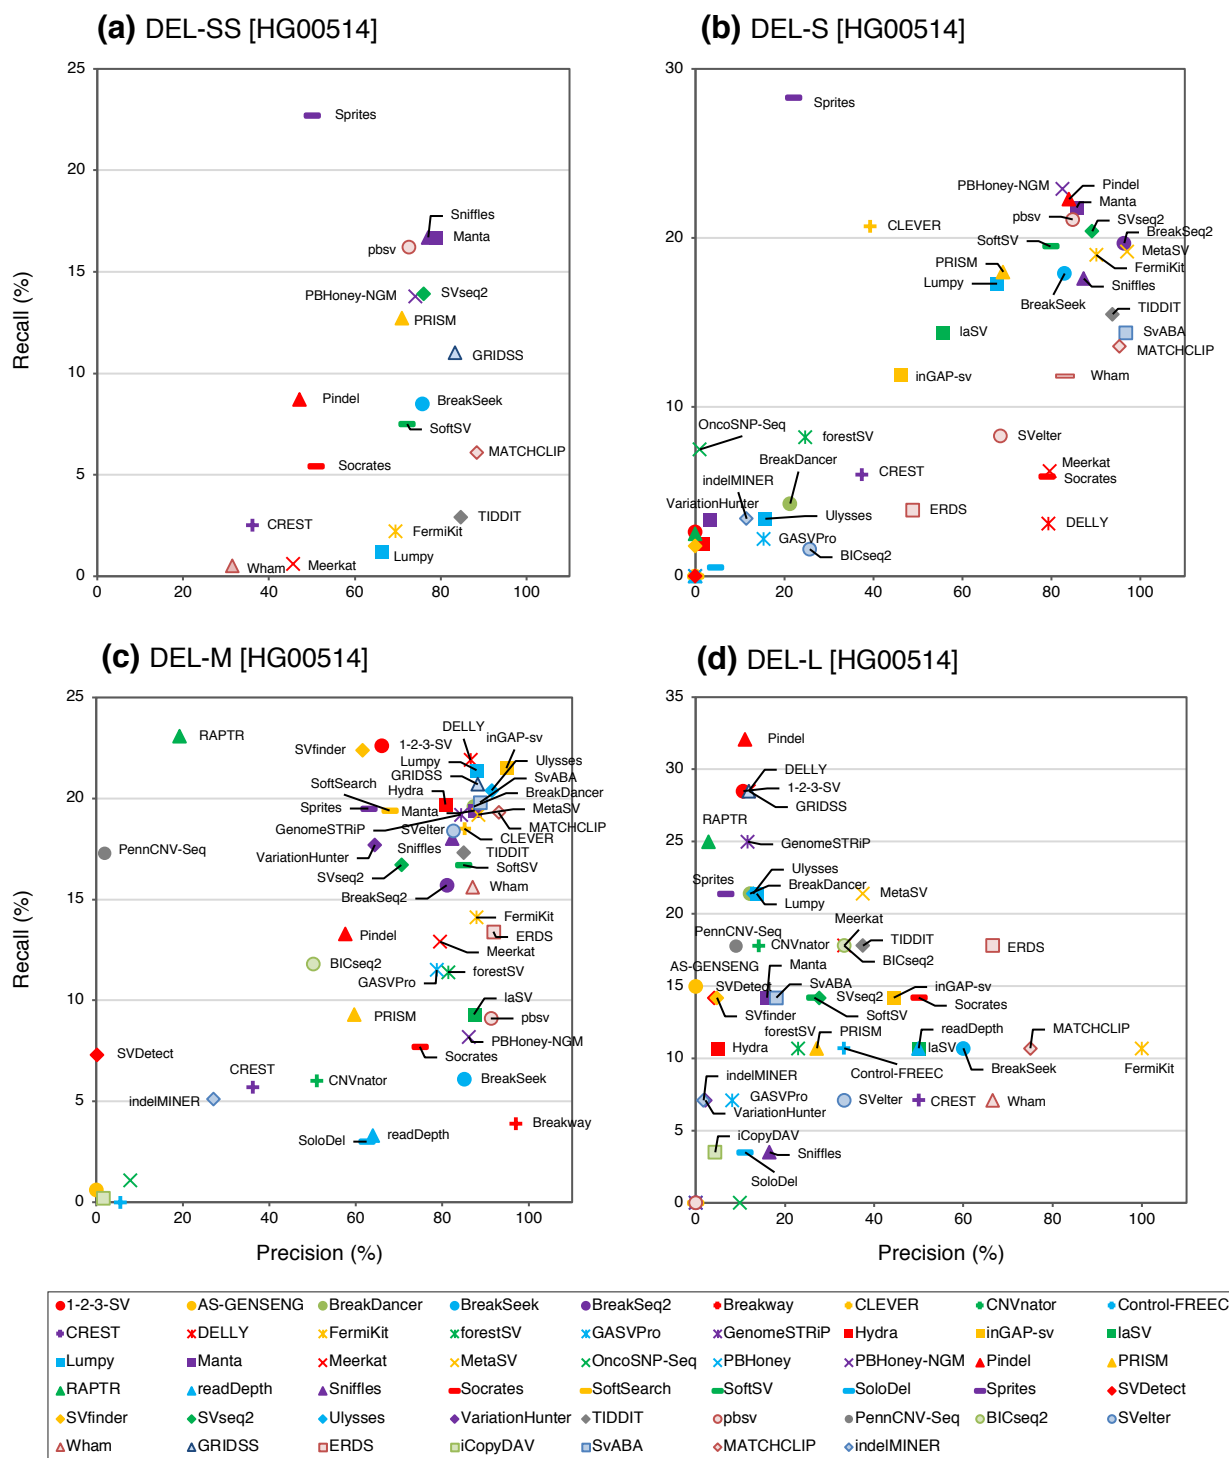

**Figure S10. Precision and recall of DELs called using existing algorithms with the HG00514 real data.** DELs were called with the indicated algorithms and the HG00514 real data. DELs were categorized into four sets depending on the size-ranges; SS: 50–100 bp (a), S: 100 bp–1 Kb (b), M: 1 Kb–100 Kb (c), L: 100 Kb–1 Mb (d). The precision and recall percentages are indicated as in Figure S3.

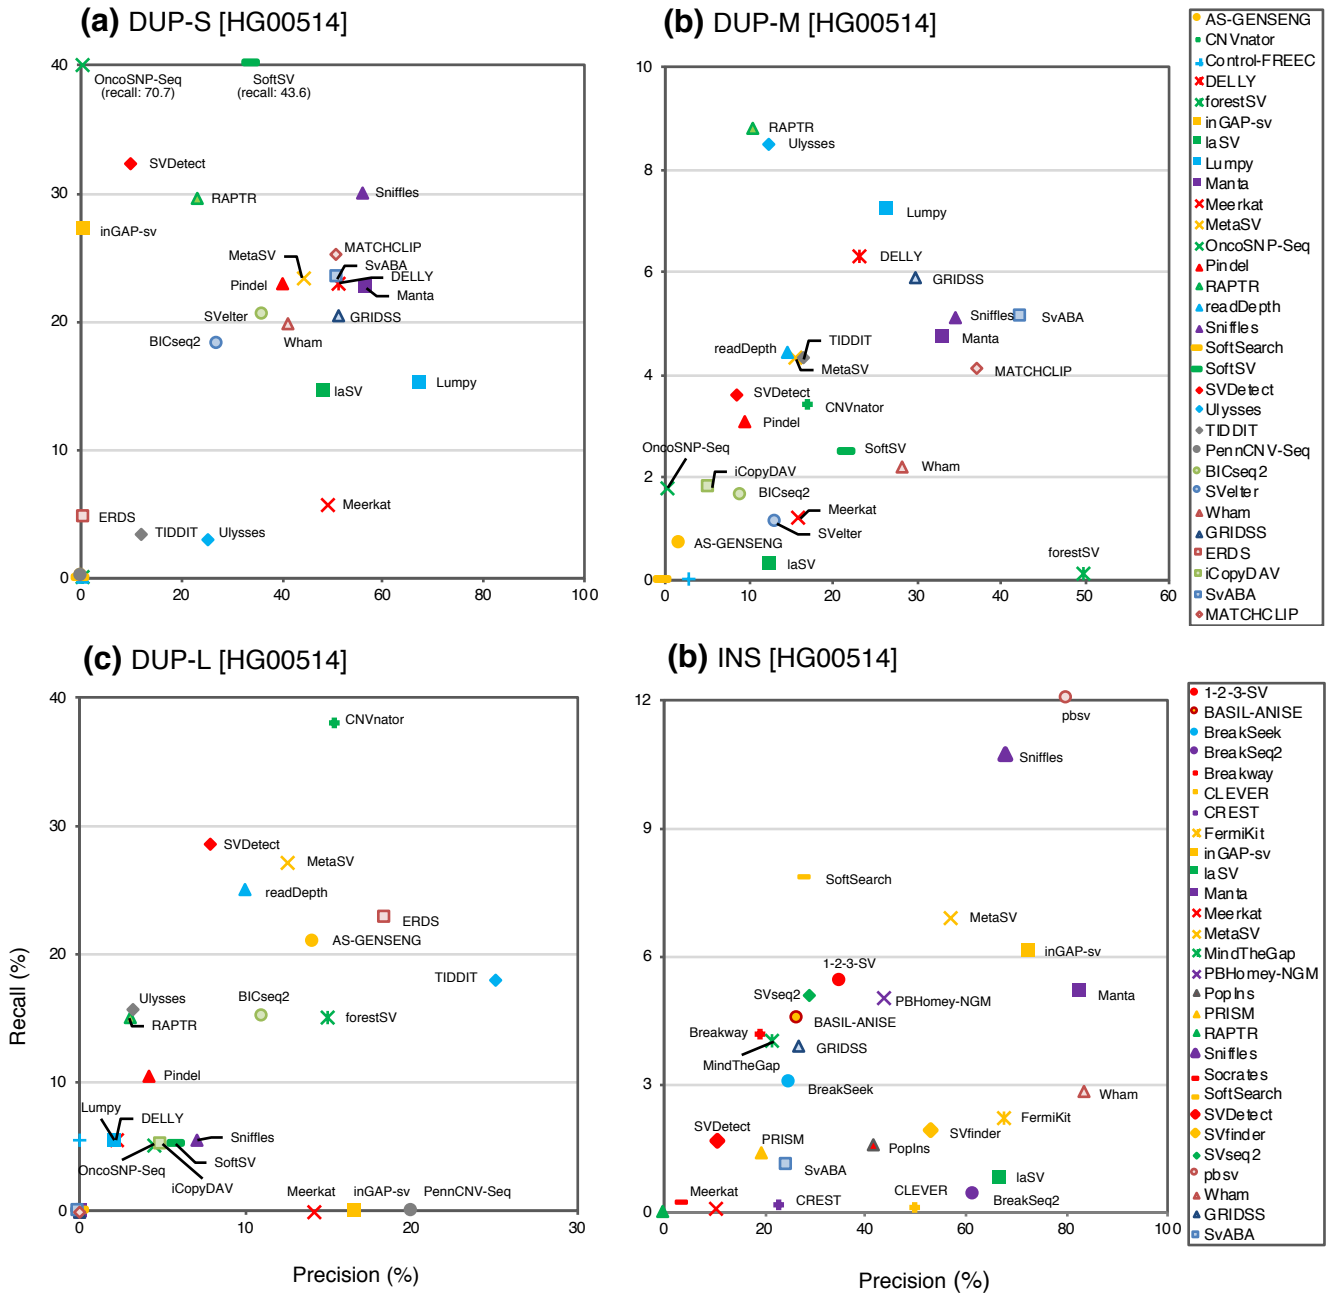

**Figure S11. Precision and recall of DUPs and INSSs called using existing algorithms with the HG00514 real data.** DUPs (a–c) and INSSs (d) were called using the indicated algorithms and the HG00514 real data. DUPs were categorized into three sets depending on the size-ranges; S: 50 bp–1 Kb (a), M: 1 Kb–100 Kb (b), L: 100 Kb–1 Mb (c). The precision and recall percentages are indicated as in Figure S3.

**(a) DEL**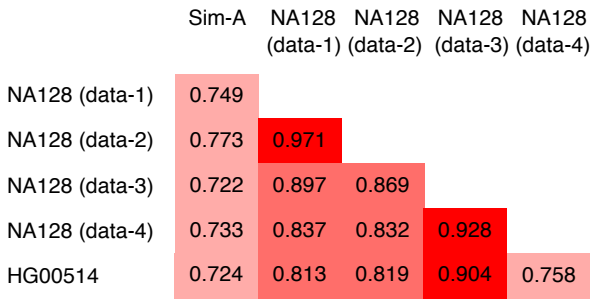**(b) DUP**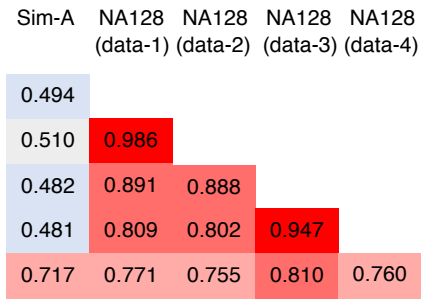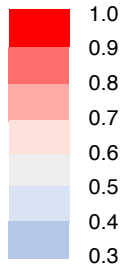**(c) INS**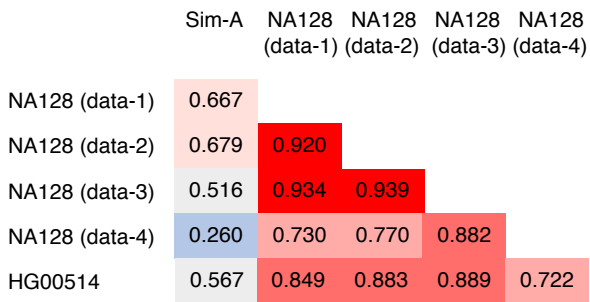**(d) INV**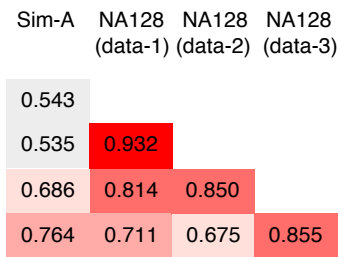**Figure S12. Spearman's rank correlation of SV calling accuracy between the datasets.**

Spearman's rank correlation coefficients were determined with the F-measures calculated with precision and recall values from pairs of datasets, which included the evaluation results for 23~45 algorithms for each SV type. The Spearman's rank correlation coefficients for DEL (a), DUP (b), INS (c), and INV (d) were determined with the pairs of the Sim-A data, NA12878 real data-1, NA12878 real data-2, NA12878 real data-3, NA12878 real data-4, and HG00514 real datasets, which are indicated at the left side and the upper panel. The levels of the Spearman's rank correlation coefficients are shown as a heatmap.

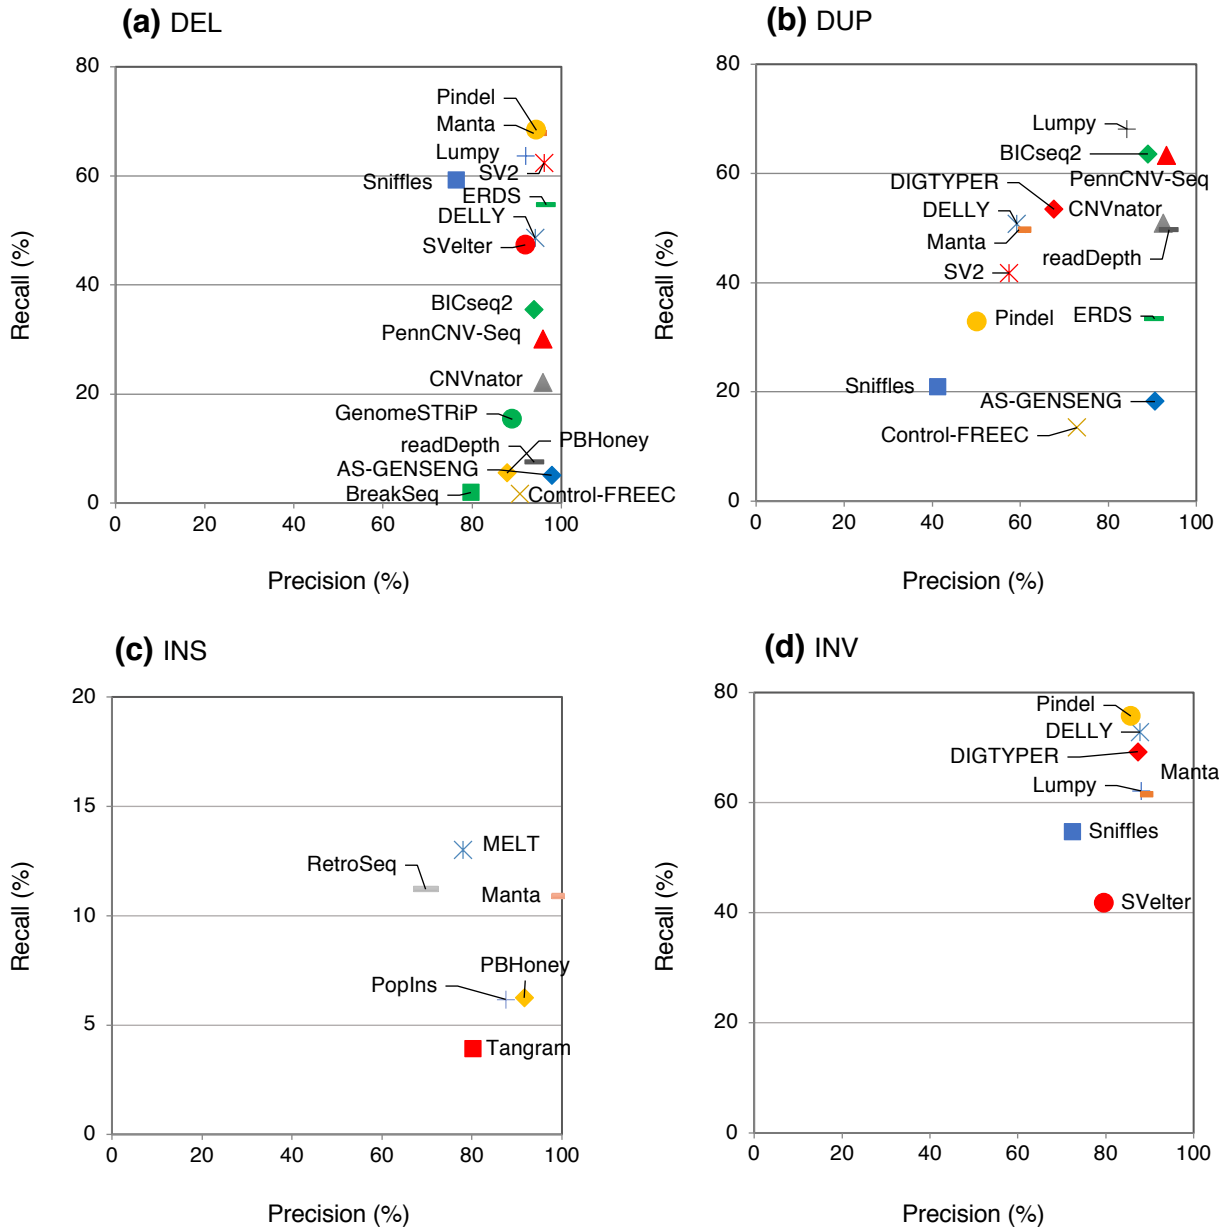

**Figure S14. Precision and recall of genotypes called with the simulated data.** The genotypes of DEL (a), DUP (b), INS (c), and INV (d) were called using the indicated algorithms with the simulated data. Precision was calculated by dividing the number of correctly called genotypes with the number of true positive calls with genotyped information and recall was calculated by dividing the number of correctly called genotypes with the total number of the corresponding reference SVs. The precision and recall determined for each respective SV type are indicated with the scales on the x-axis and y-axis, respectively.

| Algorithm     | BreakSeek:3            | CREST:3              | GRIDSS:6               | Lumpy:7               | Manta:3                | PBHoney-NGM:3          | pbsv:3                 | Pindel:9              | PRISM:5                | Sniffles:2             | Socrates:4             | SoftSV:5               | Sprites:3              | SVseq2:5               |
|---------------|------------------------|----------------------|------------------------|-----------------------|------------------------|------------------------|------------------------|-----------------------|------------------------|------------------------|------------------------|------------------------|------------------------|------------------------|
| BreakSeek:3   | 41.2/81.8<br>25.9/53.5 | 7.1/100<br>4.2/73.6  | 34.1/100<br>18.3/70.5  | 23.0/100<br>9.6/81.1  | 35.7/88.4<br>23.3/67.5 | 31.7/93.1<br>10.8/71.4 | 33.3/91.6<br>11.3/53.1 | 11.1/93.3<br>4.9/77.6 | 35.7/97.8<br>17.2/67.0 | 30.9/93.0<br>14.1/71.8 | 23.8/100<br>8.7/82.8   | 33.3/91.4<br>11.6/76.2 | 36.5/97.8<br>23.2/68.8 | 34.1/97.7<br>15.4/69.8 |
| CREST:3       | 7.1/100<br>4.2/73.6    | 7.9/30.3<br>6.7/26.7 | 7.9/100<br>5.8/73.9    | 5.5/100<br>3.8/79.6   | 7.1/100<br>6.4/72.8    | 7.1/100<br>3.1/81.1    | 7.9/100<br>3.1/58.3    | 3.1/100<br>1.8/73.1   | 6.3/100<br>4.1/72.3    | 6.3/100<br>3.8/81.0    | 5.5/100<br>3.3/84.2    | 7.9/100<br>4.0/78.6    | 7.9/100<br>6.4/73.4    | 7.1/100<br>5.1/75.6    |
| GRIDSS:6      | 34.1/100<br>18.3/70.5  | 7.9/100<br>5.8/73.9  | 54.7/92.2<br>31.5/55.0 | 30.1/100<br>12.8/80.1 | 44.4/100<br>29.6/64.5  | 44.4/100<br>11.4/70.8  | 45.2/100<br>12.2/52.9  | 19.8/100<br>6.1/75.5  | 48.4/100<br>18.0/63.7  | 42.0/100<br>15.2/70.5  | 30.9/100<br>11.1/84.6  | 38.8/100<br>13.6/78.2  | 49.2/100<br>29.4/63.5  | 46.0/100<br>20.1/66.7  |
| Lumpy:7       | 23.0/100<br>9.6/81.1   | 5.5/100<br>3.8/79.6  | 30.1/100<br>12.8/80.1  | 30.1/100<br>13.1/76.9 | 28.5/100<br>12.6/81.2  | 26.9/100<br>6.1/85.9   | 28.5/100<br>6.3/63.8   | 15.0/100<br>3.9/82.6  | 26.9/100<br>7.6/83.5   | 26.1/100<br>8.0/85.5   | 25.3/100<br>8.6/86.7   | 26.9/100<br>9.5/82.7   | 27.7/100<br>12.5/82.6  | 27.7/100<br>10.6/82.5  |
| Manta:3       | 35.7/88.4<br>23.3/67.5 | 7.1/100<br>6.4/72.8  | 44.4/100<br>29.6/64.5  | 28.5/100<br>12.6/81.2 | 55.5/69.4<br>46.0/42.5 | 46.8/91.0<br>18.5/64.9 | 48.4/90.1<br>19.1/48.4 | 18.2/92.0<br>7.7/76.6 | 46.8/92.3<br>28.7/58.1 | 45.2/90.7<br>23.8/65.4 | 28.5/97.2<br>10.9/84.1 | 37.3/94.1<br>14.5/76.0 | 46.8/93.8<br>40.1/61.1 | 41.2/98.1<br>23.3/66.3 |
| PBHoney-NGM:3 | 31.7/93.1<br>10.8/71.4 | 7.1/100<br>3.1/81.1  | 44.4/100<br>11.4/70.8  | 26.9/100<br>6.1/85.9  | 46.8/91.0<br>18.5/64.9 | 72.2/65.4<br>29.7/47.4 | 70.6/69.3<br>28.8/53.6 | 20.6/100<br>3.8/70.3  | 53.9/100<br>15.5/64.4  | 63.4/71.5<br>26.2/55.1 | 27.7/100<br>5.6/88.8   | 37.3/96.1<br>6.7/78.2  | 55.5/95.9<br>18.9/65.5 | 38.8/100<br>9.3/72.4   |
| pbsv:3        | 33.3/91.6<br>11.3/53.1 | 7.9/100<br>3.1/58.3  | 45.2/100<br>12.2/52.9  | 28.5/100<br>6.3/63.8  | 48.4/90.1<br>19.1/48.4 | 70.6/69.3<br>28.8/53.6 | 80.9/53.4<br>43.6/48.4 | 21.4/93.1<br>3.6/56.7 | 57.1/100<br>16.4/48.1  | 67.4/64.8<br>36.1/52.3 | 30.1/100<br>5.9/65.0   | 39.6/91.3<br>7.1/59.0  | 56.3/88.0<br>19.9/48.7 | 42.8/93.3<br>13.6/71.2 |
| Pindel:9      | 11.1/93.3<br>4.9/77.6  | 3.1/100<br>1.8/73.1  | 19.8/100<br>6.1/75.5   | 15.0/100<br>3.9/82.6  | 18.2/92.0<br>7.7/76.6  | 20.6/100<br>3.8/70.3   | 21.4/93.1<br>3.6/56.7  | 21.4/58.6<br>7.9/34.7 | 19.0/88.8<br>4.8/68.6  | 19.0/100<br>4.7/71.9   | 12.6/100<br>2.9/96.6   | 15.8/86.9<br>4.0/83.8  | 16.6/100<br>7.1/72.6   | 15.8/100<br>4.7/76.5   |
| PRISM:5       | 35.7/97.8<br>17.2/67.0 | 6.3/100<br>4.1/72.3  | 48.4/100<br>18.0/63.7  | 26.9/100<br>7.6/83.5  | 46.8/92.3<br>28.7/58.1 | 53.9/100<br>15.5/64.4  | 57.1/100<br>16.4/48.1  | 19.0/88.8<br>4.8/68.6 | 69.0/47.5<br>35.0/39.1 | 50.0/100<br>19.8/61.9  | 27.7/100<br>7.3/83.8   | 38.0/100<br>10.1/76.6  | 57.9/94.8<br>29.7/58.7 | 46.0/98.3<br>20.2/60.3 |
| Sniffles:2    | 30.9/93.0<br>14.1/71.8 | 6.3/100<br>3.8/81.0  | 42.0/100<br>15.2/70.5  | 26.1/100<br>8.0/85.5  | 45.2/90.7<br>23.8/65.4 | 63.4/71.5<br>26.2/55.1 | 67.4/64.8<br>36.1/52.3 | 19.0/100<br>4.7/71.9  | 50.0/100<br>19.8/61.9  | 69.8/63.5<br>37.9/48.5 | 26.9/100<br>7.3/87.0   | 34.1/93.8<br>9.0/78.4  | 50.7/91.7<br>24.7/66.0 | 37.3/94.1<br>12.5/70.6 |
| Socrates:4    | 23.8/100<br>8.7/82.8   | 5.5/100<br>3.3/84.2  | 30.9/100<br>11.1/84.6  | 25.3/100<br>8.6/86.7  | 28.5/97.2<br>10.9/84.1 | 27.7/100<br>5.6/88.8   | 30.1/100<br>5.9/65.0   | 12.6/100<br>2.9/96.6  | 27.7/100<br>7.3/83.8   | 26.9/100<br>7.3/87.0   | 32.5/48.2<br>11.6/39.5 | 27.7/100<br>8.0/84.7   | 30.9/97.5<br>11.2/85.4 | 30.9/100<br>10.0/82.1  |
| SoftSV:5      | 33.3/91.4<br>11.6/76.2 | 7.9/100<br>4.0/78.6  | 38.8/100<br>13.6/78.2  | 26.9/100<br>9.5/82.7  | 37.3/94.1<br>14.5/76.0 | 37.3/96.1<br>6.7/78.2  | 39.6/91.3<br>7.1/59.0  | 15.8/86.9<br>4.0/83.8 | 38.0/100<br>10.1/76.6  | 34.1/93.8<br>9.0/78.4  | 27.7/100<br>8.0/84.7   | 45.2/83.3<br>15.3/66.1 | 40.4/100<br>14.5/77.0  | 36.5/97.9<br>13.2/76.8 |
| Sprites:3     | 36.5/97.8<br>23.2/68.8 | 7.9/100<br>6.4/73.4  | 49.2/100<br>29.4/63.5  | 27.7/100<br>12.5/82.6 | 46.8/93.8<br>40.1/61.1 | 55.5/95.9<br>18.9/65.5 | 56.3/88.0<br>19.9/48.7 | 16.6/100<br>7.1/72.6  | 57.9/94.8<br>29.7/58.7 | 50.7/91.7<br>24.7/66.0 | 30.9/97.5<br>11.2/85.4 | 40.4/100<br>14.5/77.0  | 67.4/53.3<br>48.4/30.2 | 47.6/92.4<br>24.2/62.8 |
| SVseq2:5      | 34.1/97.7<br>15.4/69.8 | 7.1/100<br>5.1/75.6  | 46.0/100<br>20.1/66.7  | 27.7/100<br>10.6/82.5 | 41.2/98.1<br>23.3/66.3 | 38.8/100<br>9.3/72.4   | 42.8/93.3<br>13.6/71.2 | 15.8/100<br>4.7/76.5  | 46.0/98.3<br>20.2/60.3 | 37.3/94.1<br>12.5/70.6 | 30.9/100<br>10.0/82.1  | 36.5/97.9<br>13.2/76.8 | 47.6/92.4<br>24.2/62.8 | 52.3/86.0<br>26.0/51.7 |

**Figure S15. Recall and precision of SVs commonly called between a pair of SV detection algorithms for the DEL-SS category.** DELs in the small size-range (50 bp–100 bp), called using the indicated algorithms, were filtered with the minimum number of reads supporting the called SVs, indicated with the suffix number of the algorithm name. The DELs overlapping between the filtered SV sets from a pair of the indicated algorithms were selected, and the recall and precision of the selected DELs were determined. Recall (%) and precision (%) are presented with an intervening slash, and the recall/precision values for the simulated and real data are indicated in the upper and lower lines of each cell, respectively. The values for the real data are the mean of the values determined with four different NA12878 datasets. The recall/precision values for each individual algorithm are indicated with blue letters and white background. The data contained in the top 20th percentile of the combined precision scores for the simulated and real data are highlighted with a red background, and the next data contained in the top 21st–50th percentile of the combined precision scores are shown with a pale red background.



| Algorithm     | BreakDanc-er:4         | BreakSeek:3            | CLEVER:8               | CREST:4               | DELLY:4               | ERDS:3                | FermiKit:5             | forestSV:5            | GRIDSS:6               | inGAP-sv:7             | Lumpy:4                | Manta:3                | MATCHCLIP:4            | Meerkat:7              | MetaSV:3               | PBHoney-NGM:2          | pbsv:3                 | Pindel:4               | PRISM:4                | Sniffles:2             | Socrates:3            | SoftSV:4               | Sprites:3              | SvABA:3                | SVelter:3              | SVseq2:6               | Ulysses:4              | Wham:5                 |          |
|---------------|------------------------|------------------------|------------------------|-----------------------|-----------------------|-----------------------|------------------------|-----------------------|------------------------|------------------------|------------------------|------------------------|------------------------|------------------------|------------------------|------------------------|------------------------|------------------------|------------------------|------------------------|-----------------------|------------------------|------------------------|------------------------|------------------------|------------------------|------------------------|------------------------|----------|
| BreakDancer:4 | 60.3/84.2<br>13.8/80.2 | 49.7/99.7<br>9.2/97.8  | 59.8/99.7<br>10.7/92.4 | 21.8/100<br>3.5/99.1  | 28.0/100<br>7.8/87.7  | 41.9/99.3<br>7.2/97.6 | 49.5/99.5<br>9.7/98.0  | 26.2/91.6<br>4.9/92.1 | 62.3/99.7<br>13.3/95.0 | 60.8/99.1<br>13.3/93.3 | 58.6/99.7<br>10.7/95.4 | 57.3/99.8<br>11.5/96.7 | 54.6/99.8<br>11.0/96.1 | 47.9/99.7<br>9.0/99.0  | 54.7/99.7<br>10.9/97.8 | 56.1/99.5<br>8.2/95.4  | 56.5/99.7<br>6.1/72.1  | 58.2/99.8<br>11.3/94.7 | 43.8/99.7<br>9.2/86.3  | 58.3/99.7<br>7.9/96.2  | 48.3/99.8<br>2.8/99.0 | 55.7/99.8<br>10.4/98.9 | 60.9/99.7<br>12.1/95.8 | 37.7/99.8<br>7.2/97.0  | 37.4/99.5<br>8.8/97.7  | 57.1/99.7<br>12.8/98.7 | 34.2/99.1<br>10.3/70.6 | 53.8/99.7<br>10.7/98.6 |          |
| BreakSeek:3   | 49.7/99.7<br>9.2/97.8  | 69.1/99.8<br>23.1/85.8 | 60.7/99.8<br>15.7/97.0 | 23.1/100<br>5.6/98.4  | 24.7/100<br>6.1/96.4  | 37.1/99.8<br>5.6/98.9 | 55.7/99.9<br>17.8/97.8 | 2.5/98.2              | 67.6/99.9<br>21.6/97.2 | 53.3/100<br>12.6/97.2  | 61.4/99.9<br>18.6/98.0 | 62.5/99.4<br>20.7/97.0 | 56.2/99.9<br>16.1/98.7 | 47.8/99.5<br>9.2/99.2  | 61.7/99.9<br>9.1/99.4  | 62.1/99.9<br>15.0/98.1 | 62.1/99.9<br>11.3/73.6 | 64.4/99.9<br>20.8/97.5 | 51.4/99.9<br>13.2/95.2 | 63.5/99.6<br>14.5/98.2 | 54.7/100<br>6.4/98.6  | 64.0/99.9<br>16.9/97.6 | 67.9/99.4<br>21.7/95.5 | 37.7/100<br>10.7/98.1  | 34.0/100<br>9.2/99.1   | 65.4/99.8<br>19.1/98.1 | 29.9/98.8<br>8.1/72.2  | 55.4/99.8<br>14.0/99.3 |          |
| CLEVER:8      | 59.8/99.7<br>10.7/92.4 | 60.7/99.4<br>15.7/97.0 | 81.4/87.3<br>27.9/40.3 | 26.3/100<br>5.2/98.8  | 28.2/99.8<br>6.7/94.0 | 41.1/99.8<br>6.5/98.2 | 60.9/99.7<br>16.8/98.0 | 21.9/99.7<br>3.2/93.2 | 77.4/99.8<br>22.0/96.4 | 67.6/99.8<br>16.1/93.3 | 68.0/99.8<br>16.8/98.8 | 69.4/99.7<br>19.3/96.7 | 63.0/99.8<br>15.8/98.7 | 54.2/99.4<br>9.7/99.1  | 56.3/99.9<br>9.8/98.0  | 72.1/99.9<br>17.8/93.0 | 73.1/99.6<br>13.6/70.0 | 70.9/99.6<br>19.4/96.1 | 56.7/99.3<br>13.8/91.0 | 74.4/99.7<br>17.2/93.6 | 57.7/100<br>4.7/99.1  | 67.3/99.6<br>15.6/98.5 | 75.8/99.6<br>20.3/96.0 | 43.6/99.8<br>10.5/97.8 | 37.6/99.8<br>11.0/97.2 | 69.4/99.7<br>18.1/98.3 | 83.9/99.0<br>9.1/71.6  | 61.1/99.9<br>13.7/99.5 |          |
| CREST:4       | 21.8/100<br>3.5/99.1   | 23.1/100<br>5.6/98.4   | 26.3/100<br>5.2/98.8   | 29.8/46.3<br>2.1/99.5 | 28.0/100<br>11.2/93.2 | 14.9/100<br>1.9/99.1  | 25.1/100<br>6.7/98.6   | 7.8/100<br>0.9/99.6   | 29.5/100<br>4.2/100    | 24.2/100<br>4.5/99.1   | 27.8/100<br>7.4/98.3   | 27.6/100<br>7.7/97.9   | 23.3/100<br>5.1/99.3   | 21.2/100<br>3.5/99.8   | 20.6/100<br>3.3/99.8   | 26.4/99.8<br>4.9/99.1  | 26.6/100<br>3.7/74.3   | 28.5/100<br>7.8/97.9   | 21.9/100<br>4.3/96.2   | 26.8/100<br>4.7/99.0   | 25.6/100<br>2.8/97.6  | 27.7/99.6<br>6.4/98.4  | 29.5/100<br>8.1/97.5   | 17.3/100<br>3.9/97.6   | 14.9/100<br>2.4/99.1   | 28.9/100<br>6.6/98.4   | 13.5/100<br>3.0/74.3   | 25.1/99.7<br>5.4/99.5  |          |
| DELLY:4       | 28.0/100<br>7.8/87.7   | 24.7/100<br>6.1/96.4   | 28.2/99.8<br>6.7/94.0  | 11.0/99.5<br>2.2/98.2 | 30.4/99.4<br>8.9/88.8 | 23.1/100<br>5.2/96.7  | 23.0/99.7<br>6.0/97.3  | 9.3/100<br>2.4/66.9   | 29.6/99.8<br>8.4/95.1  | 28.4/100<br>8.2/95.4   | 29.7/99.8<br>6.7/95.9  | 27.3/100<br>7.2/96.5   | 26.7/99.8<br>5.4/96.8  | 25.6/100<br>6.5/98.5   | 26.3/99.8<br>5.2/95.4  | 26.4/99.8<br>3.9/72.4  | 26.4/99.8<br>3.9/72.4  | 27.2/99.8<br>7.0/95.9  | 18.6/99.7<br>5.8/97.0  | 18.6/99.7<br>5.8/97.0  | 27.9/100<br>5.3/96.4  | 22.9/100<br>1.9/97.8   | 26.8/99.6<br>6.5/97.4  | 29.1/99.8<br>4.6/95.0  | 18.8/99.7<br>5.8/94.6  | 21.3/100<br>7.8/98.6   | 26.4/99.8<br>8.3/69.2  | 28.9/99.6<br>6.5/97.7  |          |
| ERDS:3        | 41.9/99.3<br>7.2/97.6  | 37.1/99.8<br>5.6/98.9  | 41.1/99.8<br>6.5/98.2  | 14.9/100<br>1.9/99.1  | 23.1/100<br>5.2/96.7  | 43.6/95.1<br>8.8/82.8 | 34.1/100<br>5.6/99.4   | 16.7/99.0<br>2.2/94.0 | 44.5/99.8<br>8.1/97.8  | 43.0/98.9<br>8.1/96.1  | 42.3/99.8<br>6.2/98.7  | 43.1/100<br>6.9/99.2   | 39.4/100<br>6.4/99.3   | 35.7/99.8<br>5.1/98.7  | 39.6/99.8<br>6.0/99.9  | 40.4/99.7<br>5.4/96.0  | 40.6/99.8<br>4.0/72.4  | 42.0/100<br>6.6/99.2   | 31.3/100<br>5.4/99.0   | 41.7/99.8<br>5.3/96.8  | 34.1/100<br>2.0/99.7  | 40.0/100<br>6.1/99.1   | 43.0/99.7<br>7.2/98.7  | 26.1/100<br>4.5/99.4   | 30.9/98.6<br>5.9/98.6  | 40.0/100<br>7.4/99.0   | 27.8/99.8<br>6.8/70.2  | 37.3/100<br>6.0/99.6   |          |
| FermiKit:5    | 49.5/99.5<br>9.7/98.0  | 55.7/99.9<br>18.7/97.8 | 60.0/99.7<br>16.8/98.0 | 2.5/100<br>6.7/98.6   | 23.0/99.7<br>6.0/97.3 | 34.1/100<br>5.6/99.4  | 67.8/99.2<br>27.2/89.6 | 17.6/100<br>3.0/98.9  | 66.5/99.8<br>24.4/96.4 | 55.2/99.9<br>13.4/98.6 | 61.1/99.8<br>21.1/97.4 | 61.1/99.9<br>23.7/95.7 | 54.5/99.8<br>17.2/98.8 | 46.2/99.7<br>9.5/99.6  | 48.4/99.9<br>15.5/97.7 | 59.5/99.9<br>11.8/73.3 | 59.6/100<br>11.8/73.3  | 64.4/99.8<br>23.6/95.5 | 51.3/99.7<br>13.5/94.5 | 61.4/100<br>15.1/97.9  | 56.6/100<br>6.7/97.1  | 61.1/99.8<br>17.5/98.5 | 66.1/99.8<br>24.4/95.4 | 38.1/99.8<br>10.9/97.5 | 32.8/99.8<br>9.3/99.1  | 64.1/99.8<br>19.1/97.7 | 28.2/99.8<br>8.2/74.4  | 55.5/99.9<br>14.8/99.4 |          |
| forestSV:5    | 26.2/91.6<br>4.9/92.1  | 17.6/99.7<br>2.5/98.2  | 21.9/99.7<br>3.2/93.2  | 7.8/100<br>0.9/99.6   | 9.3/100<br>2.4/66.9   | 16.7/99.0<br>2.2/94.0 | 17.6/100<br>3.0/98.9   | 18.2/54.0<br>8.0/28.0 | 20.4/99.7<br>4.1/95.8  | 20.3/99.8<br>3.8/93.2  | 18.3/99.8<br>2.6/98.5  | 19.6/100<br>3.5/97.1   | 18.4/100<br>2.8/98.9   | 15.5/100<br>2.2/98.4   | 15.2/99.1<br>2.3/99.4  | 19.6/99.4<br>2.7/93.9  | 18.9/99.7<br>2.0/71.9  | 19.2/100<br>3.2/99.1   | 14.8/100<br>2.5/98.9   | 19.5/99.7<br>2.7/95.4  | 15.6/100<br>1.1/98.7  | 18.3/100<br>2.6/99.1   | 20.2/99.7<br>3.5/96.4  | 2.4/98.6               | 2.4/98.6               | 2.6/96.6               | 3.4/99.4               | 7.9/68.9               | 2.5/98.1 |
| GRIDSS:6      | 62.3/99.7<br>13.3/95.0 | 67.6/99.9<br>21.6/99.2 | 77.4/99.8<br>22.0/96.4 | 29.5/100<br>8.0/97.9  | 29.6/99.8<br>8.4/95.1 | 44.5/99.8<br>8.1/97.8 | 66.5/99.8<br>24.4/96.4 | 20.4/99.8<br>4.1/95.8 | 88.0/97.9<br>70.2/95.6 | 70.9/99.6<br>25.7/94.2 | 75.8/99.9<br>28.9/95.5 | 77.4/99.8<br>28.9/95.5 | 67.4/99.8<br>21.2/98.0 | 57.8/99.7<br>12.0/98.9 | 59.2/99.9<br>19.4/97.3 | 76.9/99.6<br>19.4/97.3 | 77.5/99.7<br>14.7/73.0 | 79.5/99.8<br>28.6/95.4 | 61.6/99.7<br>16.9/95.0 | 79.2/99.7<br>18.8/97.1 | 65.1/100<br>8.3/95.2  | 74.7/99.7<br>21.4/97.8 | 83.8/99.6<br>30.5/93.3 | 47.8/99.8<br>14.4/97.1 | 39.4/99.8<br>23.4/96.6 | 78.6/99.9<br>15.5/71.2 | 36.9/99.5<br>11.5/71.2 | 66.1/100<br>17.8/98.9  |          |
| inGAP-sv:7    | 60.8/99.1<br>13.3/93.3 | 55.3/100<br>12.6/97.2  | 67.6/99.8<br>16.1/93.3 | 24.2/100<br>4.5/99.1  | 28.4/100<br>8.2/95.4  | 43.0/98.9<br>8.1/96.1 | 55.2/99.9<br>13.4/98.6 | 20.3/99.4<br>3.8/93.2 | 70.2/99.6<br>19.3/95.5 | 71.9/95.5<br>21.1/68.1 | 64.6/99.9<br>14.1/97.4 | 64.4/99.9<br>15.4/99.7 | 60.2/100<br>14.0/98.1  | 53.8/99.9<br>10.9/98.9 | 57.4/99.9<br>11.7/99.0 | 63.8/99.6<br>13.0/96.0 | 64.5/99.6<br>9.7/72.4  | 65.9/100<br>15.7/98.2  | 50.6/99.8<br>12.5/96.6 | 66.4/99.9<br>12.5/96.6 | 53.8/100<br>4.1/99.4  | 62.3/100<br>13.8/99.0  | 68.5/99.8<br>16.7/97.4 | 43.1/100<br>10.4/98.0  | 38.9/99.2<br>12.0/97.5 | 63.8/100<br>16.7/99.3  | 34.5/99.7<br>11.2/70.2 | 60.4/99.4<br>13.5/99.0 |          |
| Lumpy:4       | 58.6/99.7<br>10.7/95.4 | 61.4/99.9<br>18.6/98.0 | 68.0/99.8<br>16.8/98.0 | 27.8/100<br>7.4/98.3  | 29.7/99.8<br>6.7/95.9 | 42.3/99.8<br>6.2/98.7 | 61.1/99.8<br>21.1/97.4 | 18.3/98.8<br>2.6/98.5 | 75.8/99.5<br>25.7/94.2 | 64.6/99.9<br>14.1/97.4 | 76.5/99.2<br>26.2/90.3 | 69.7/99.8<br>24.2/96.9 | 62.1/99.8<br>18.4/98.8 | 53.7/99.8<br>10.4/99.4 | 55.6/99.9<br>10.4/99.2 | 67.3/99.8<br>15.2/98.8 | 67.6/99.8<br>11.4/74.2 | 72.3/99.8<br>24.0/96.5 | 54.0/99.7<br>12.5/98.2 | 69.9/99.9<br>14.6/98.9 | 62.4/100<br>7.7/94.6  | 68.2/99.8<br>18.6/98.2 | 74.4/99.6<br>25.3/92.5 | 44.3/99.8<br>11.9/97.9 | 38.3/100<br>10.1/99.1  | 70.9/99.8<br>20.5/97.7 | 35.7/99.4<br>8.3/71.0  | 63.5/99.9<br>16.5/99.3 |          |
| Manta:3       | 57.3/99.8<br>11.5/96.7 | 62.5/99.4<br>20.7/97.0 | 69.4/99.8<br>19.3/96.7 | 7.4/98.3<br>7.7/97.9  | 23.7/100<br>7.2/96.5  | 43.1/100<br>6.9/99.2  | 61.1/99.9<br>23.7/95.7 | 6.9/100<br>3.9/97.1   | 77.4/99.8<br>28.9/95.5 | 64.4/99.9<br>15.9/97.7 | 69.2/99.8<br>24.2/96.9 | 79.6/99.4<br>32.5/77.9 | 62.5/99.7<br>19.9/98.3 | 53.6/99.7<br>11.1/99.1 | 55.0/99.9<br>11.1/98.7 | 70.5/99.0<br>17.8/96.0 | 70.7/98.9<br>13.6/72.5 | 73.4/99.4<br>27.7/94.7 | 56.8/99.8<br>16.6/88.8 | 72.5/99.2<br>17.3/96.6 | 60.6/100<br>8.0/97.6  | 69.1/99.2<br>20.6/97.5 | 76.5/99.6<br>25.9/92.6 | 43.3/100<br>13.9/97.1  | 38.5/99.8<br>11.2/98.3 | 22.5/99.7<br>10.0/72.9 | 61.1/99.9<br>12.6/99.2 | 61.6/99.9<br>16.8/99.2 |          |
| MATCHCLIP:4   | 54.6/99.8<br>11.0/96.1 | 56.2/99.9<br>16.1/98.7 | 63.0/99.8<br>15.8/98.7 | 23.3/100<br>5.1/99.3  | 26.7/99.8<br>7.2/97.6 | 39.4/100<br>6.4/99.3  | 54.5/99.8<br>17.2/98.8 | 18.4/100<br>2.8/98.9  | 67.4/99.8<br>21.2/98.0 | 60.2/100<br>14.0/98.1  | 62.1/99.8<br>18.4/98.8 | 62.5/99.7<br>19.9/98.3 | 67.8/99.6<br>21.4/96.5 | 49.0/99.7<br>10.1/99.4 | 51.7/99.9<br>10.6/99.3 | 60.5/100<br>13.3/99.2  | 60.9/100<br>10.0/74.4  | 61.4/99.8<br>19.8/98.2 | 50.6/99.6<br>12.7/94.9 | 50.6/99.6<br>12.7/94.9 | 62.4/100<br>4.8/99.2  | 54.9/100<br>6.0/99.2   | 62.1/99.7<br>16.7/98.9 | 62.1/99.7<br>16.7/98.9 | 38.4/99.8<br>10.1/98.8 | 36.6/100<br>18.5/98.5  | 32.2/99.8<br>9.6/74.4  | 57.2/100<br>14.9/99.2  |          |
| Meerkat:7     | 47.9/99.7<br>9.0/99.0  | 47.5/99.5<br>9.2/99.2  | 54.2/99.4<br>9.7/99.1  | 21.2/100<br>3.5/98.9  | 24.0/99.7<br>5.6/96.8 | 35.7/99.8<br>5.1/98.7 | 46.2/99.7<br>9.5/99.6  | 15.5/100<br>2.2/98.4  | 57.8/99.7<br>12.0/98.9 | 53.8/99.9<br>10.9/98.9 | 53.7/99.8<br>10.4/99.4 | 53.6/99.7<br>11.1/99.1 | 49.0/99.7<br>12.3/91.9 | 58.2/97.3<br>12.3/91.9 | 46.4/99.8<br>8.6/99.9  | 52.1/99.8<br>7.7/99.4  | 52.5/99.7<br>5.7/74.5  | 55.4/99.8<br>11.1/99.3 | 42.0/99.7<br>8.3/99.1  | 53.9/99.7<br>7.3/99.0  | 47.4/100<br>3.0/98.6  | 53.0/99.5<br>10.4/98.9 | 57.0/99.4<br>11.8/98.8 | 35.5/99.8<br>7.0/98.4  | 31.5/100<br>12.3/99.3  | 64.7/99.8<br>8.7/84.1  | 28.7/99.4<br>7.8/74.1  | 51.5/100<br>10.3/99.4  |          |
| MetaSV:3      | 54.7/99.7<br>10.9/97.8 | 47.8/99.8<br>9.1/99.4  | 56.3/99.9<br>13.3/99.8 | 20.6/100<br>3.9/99.8  | 25.6/100<br>6.5/98.5  | 39.6/99.8<br>6.0/99.9 | 48.4/99.8<br>9.5/98.7  | 18.2/99.1<br>2.3/99.4 | 59.2/99.9<br>12.0/98.7 | 57.4/99.9<br>11.7/99.0 | 55.6/99.9<br>10.4/99.2 | 55.0/99.9<br>11.1/98.7 | 51.7/99.9<br>10.6/99.3 | 46.4/99.8<br>12.1/97.7 | 59.4/99.9<br>7.6/99.5  | 53.1/99.9<br>5.7/74.4  | 53.3/99.8<br>5.7/74.4  | 58.8/99.9<br>11.9/98.6 | 43.6/99.8<br>9.0/95.9  | 55.2/99.9<br>7.3/99.4  | 47.7/100<br>2.9/99.3  | 53.7/99.9<br>10.5/99.8 | 58.2/99.9<br>11.6/99.3 | 37.3/100<br>7.0/98.3   | 34.6/100<br>8.0/99.7   | 55.4/99.9<br>12.7/99.7 | 31.2/99.8<br>9.0/74.6  | 52.6/99.8<br>10.5/99.8 |          |
| PBHoney-NGM:2 | 56.1/99.5<br>8.2/95.4  | 61.7/99.5<br>11.8/93.0 | 72.1/99.7<br>17.8/93.0 | 26.4/99.8<br>4.9/99.1 | 26.3/99.8<br>5.2/95.4 | 40.4/99.7<br>5.4/96.0 | 59.5/99.9<br>15.5/97.7 | 19.6/99.4<br>2.7/93.9 | 76.9/99.6<br>19.4/97.3 | 63.8/99.6<br>13.0/96.0 | 67.3/99.8<br>15.2/98.8 | 70.5/99.0<br>17.8/96.0 | 60.5/100<br>13.3/99.2  | 52.1/99.8<br>7.7/99.4  | 53.1/99.9<br>6.7/99.5  | 83.3/92.3<br>28.8/72.3 | 82.8/94.2<br>27.3/81.0 | 71.3/99.7<br>18.0/97.0 | 57.5/99.8<br>13.7/95.2 | 81.1/96.3<br>25.6/81.2 | 58.6/100<br>4.8/99.2  | 67.8/99.6<br>14.0/98.5 | 76.6/99.5<br>19.1/95.8 | 41.4/100<br>10.1/97.8  | 35.9/99.8<br>9.9/97.0  | 70.2/99.8<br>14.0/98.8 | 31.4/98.2<br>6.9/84.2  | 58.8/100<br>11.6/99.6  |          |
| pbsv:3        | 56.5/99.7<br>6.1/72.1  | 62.1/99.5<br>11.3/73.6 | 73.1/99.6<br>13.6/70.0 | 26.6/100<br>3.7/74.3  | 26.4/99.8<br>3.9/72.4 | 40.6/99.8<br>4.0/72.4 | 59.6/100<br>11.8/73.3  | 18.9/99.7<br>2.0/71.9 | 77.5/99.7<br>14.7/73.0 | 64.5/99.7<br>9.7/72.4  | 67.6/99.8<br>11.4/74.2 | 60.9/100<br>10.0/74.4  | 52.5/99.7<br>5.7/74.5  | 53.3/99.8<br>5.7/74.4  | 53.3/99.8<br>5.7/74.4  | 82.8/94.2<br>29.4/78.4 | 84.4/92.4<br>13.6/72.7 | 58.1/99.2<br>10.5/71.3 | 58.1/99.2<br>10.5/71.3 | 61.9/96.               |                       |                        |                        |                        |                        |                        |                        |                        |          |

| Algorithm   | 1-2-3-SV-8 | EOseq2   | BreakDanc | CLEVER4  | OWriters | CREST3   | DELLy5   | ERDS3    | FemKits  | foresSV  | GAS/Pro  | GenomesT | GRDSS-6  | Hydra-sv7 | inGAP-sv7 | Lumpy-6  | Manta3    | MATCHCLIP-4 | Meerkat7 | MetaSV3  | pbsv3    | PennCNV  | Pindel4  | PRISM3   | RAPTR-10 | Sniffles-2 | Socrates3 | SoftSV4  | Sprites3 | SvABA3   | SVDetect5 | SvFilter3 | SvFinder10 | SVseq2-5 | TIDDIT3  | Ulysses-4 | Variation Hunter-6 | Wham-4   |
|-------------|------------|----------|-----------|----------|----------|----------|----------|----------|----------|----------|----------|----------|----------|-----------|-----------|----------|-----------|-------------|----------|----------|----------|----------|----------|----------|----------|------------|-----------|----------|----------|----------|-----------|-----------|------------|----------|----------|-----------|--------------------|----------|
| 1-2-3-SV-8  | 72,951.6   | 25,898.5 | 4,986.8   | 11,577.7 | 25,788.8 | 2,310.0  | 5,932.8  | 4,935.5  | 3,694.1  | 57,864.2 | 17,697.8 | 13,386.7 | 6,594.4  | 72,253.8  | 5,697.3   | 6,293.1  | 5,498.6   | 4,293.2     | 5,286.0  | 7,668.2  | 1,110.0  | 29,572.5 | 5,189.3  | 1,675.8  | 55,050.1 | 7,787.0    | 4,391.8   | 4,592.1  | 6,884.7  | 4,498.3  | 70,253.6  | 4,695.2   | 72,053.0   | 5,992.8  | 55,898.7 | 50,994.5  | 30,266.1           | 5,590.0  |
| BICseq2-8   | 25,898.5   | 7,668.7  | 6,831.9   | 13,075.4 | 3,597.9  | 2,874.4  | 10,066.6 | 9,486.6  | 7,590.5  | 15,794.0 | 14,293.6 | 13,079.9 | 12,366.2 | 25,898.9  | 11,590.1  | 11,776.3 | 11,886.9  | 9,284.8     | 9,186.7  | 9,195.1  | 9,076.0  | 5,480.4  | 4,152.1  | 5,651.1  | 17,780.4 | 5,786.2    | 4,494.5   | 8,570.6  | 10,861.0 | 10,890.2 | 18,369.1  | 8,293.6   | 26,184.2   | 21,170.6 | 14,993.3 | 18,378.8  | 17,694.0           | 8,888.4  |
| BreakDanc3  | 4,986.8    | 66,798.4 | 11,410.2  | 13,199.6 | 6,088.1  | 3,210.0  | 13,999.6 | 13,597.8 | 9,210.0  | 14,493.2 | 9,099.9  | 12,810.0 | 13,499.9 | 13,099.9  | 12,910.0  | 13,199.9 | 13,399.9  | 10,810.0    | 9,599.9  | 9,499.6  | 3,173.6  | 11,774.5 | 7,174.5  | 5,100.0  | 9,198.4  | 7,599.3    | 6,888.9   | 8,399.9  | 11,099.6 | 11,310.0 | 10,595.1  | 8,999.0   | 12,999.1   | 8,710.0  | 14,198.6 | 14,998.3  | 11,498.9           | 9,299.8  |
| CLEVER4     | 11,577.7   | 61,497.9 | 78,899.4  | 84,059.7 | 52,297.2 | 31,710.0 | 25,794.8 | 11,099.2 | 64,917.0 | 10,596.4 | 16,210.0 | 22,599.6 | 82,510.0 | 81,465.1  | 24,197.8  | 20,899.0 | 75,910.0  | 73,099.5    | 62,798.8 | 58,598.7 | 40,998.1 | 32,100.0 | 62,198.6 | 58,097.7 | 70,998.1 | 63,192.6   | 74,298.0  | 64,465.7 | 77,899.7 | 62,798.2 | 66,910.0  | 73,998.4  | 84,099.4   | 80,469.8 | 73,998.6 | 63,597.1  | 32,497.2           | 75,010.0 |
| CREST3      | 2,310.0    | 26,945.3 | 4,300.0   | 81,170.0 | 17,189.5 | 36,043.5 | 35,710.0 | 31,000.0 | 29,710.0 | 30,997.1 | 14,010.0 | 35,410.0 | 35,610.0 | 35,198.9  | 34,210.0  | 34,810.0 | 34,810.0  | 31,500.0    | 33,599.7 | 25,296.6 | 4,400.0  | 26,499.1 | 26,710.0 | 26,197.1 | 32,810.0 | 29,210.0   | 34,999.7  | 35,000.0 | 30,010.0 | 34,498.6 | 29,710.0  | 34,998.9  | 35,040.0   | 29,710.0 | 36,099.7 | 10,697.0  | 10,100.0           | 33,710.0 |
| DELLy5      | 5,932.8    | 68,996.0 | 88,994.8  | 83,099.8 | 65,999.6 | 35,710.0 | 74,995.0 | 80,099.1 | 73,199.8 | 78,099.6 | 18,799.1 | 92,899.5 | 93,599.7 | 92,599.7  | 88,499.1  | 91,399.0 | 80,399.9  | 81,499.8    | 85,099.5 | 86,198.8 | 13,210.0 | 71,399.6 | 68,499.0 | 65,699.1 | 73,096.6 | 83,899.6   | 73,799.7  | 87,399.9 | 93,399.7 | 77,499.0 | 92,698.4  | 72,998.6  | 92,098.8   | 89,899.8 | 76,610.0 | 93,899.5  | 95,299.7           | 85,010.0 |
| ERDS3       | 4,986.8    | 65,494.1 | 77,099.0  | 71,099.2 | 38,896.3 | 31,099.5 | 20,099.1 | 80,795.6 | 13,998.8 | 78,199.8 | 16,899.9 | 70,999.7 | 79,299.3 | 78,899.3  | 77,799.8  | 77,799.3 | 78,199.3  | 74,299.9    | 73,098.5 | 59,697.8 | 11,910.0 | 64,692.7 | 57,799.0 | 39,499.4 | 65,499.1 | 72,499.5   | 84,499.7  | 75,099.6 | 79,199.8 | 68,099.6 | 77,598.8  | 68,399.5  | 78,497.7   | 78,499.5 | 71,199.7 | 80,799.1  | 29,999.4           | 72,799.7 |
| FemKits3    | 3,694.1    | 56,296.1 | 71,999.8  | 64,910.0 | 42,999.7 | 29,710.0 | 73,199.8 | 83,999.2 | 73,199.8 | 83,999.2 | 14,399.4 | 73,499.7 | 73,999.7 | 72,299.8  | 70,299.8  | 73,299.6 | 71,599.8  | 68,899.7    | 68,499.6 | 53,598.4 | 11,710.0 | 5,999.9  | 52,999.9 | 39,999.7 | 57,599.6 | 66,999.8   | 63,999.8  | 71,410.0 | 73,199.8 | 81,099.8 | 70,798.6  | 59,999.8  | 71,498.2   | 72,299.0 | 59,710.0 | 73,299.7  | 70,710.0           |          |
| foresSV-6   | 57,864.2   | 66,798.3 | 75,869.5  | 70,496.4 | 72,997.2 | 30,997.1 | 78,968.7 | 75,794.8 | 62,897.2 | 68,585.1 | 15,165.1 | 67,594.0 | 74,798.6 | 65,263.8  | 63,492.6  | 63,299.5 | 68,995.5  | 58,995.5    | 58,895.2 | 40,994.0 | 39,975.0 | 50,981.1 | 47,494.9 | 91,894.2 | 52,161.5 | 68,995.5   | 52,996.6  | 60,795.9 | 64,999.1 | 51,295.5 | 63,895.6  | 65,894.0  | 62,995.0   | 67,696.7 | 70,094.8 | 28,599.5  | 52,925.3           |          |
| GAS/Pro7    | 17,697.8   | 14,493.2 | 18,599.4  | 19,098.9 | 7,381.2  | 4,598.9  | 20,598.9 | 18,497.5 | 12,999.2 | 24,154.2 | 12,099.6 | 15,599.1 | 15,999.1 | 18,797.7  | 15,198.6  | 15,498.7 | 15,899.3  | 12,799.1    | 11,499.3 | 10,299.3 | 3,474.7  | 13,173.3 | 7,299.4  | 6,199.8  | 13,794.9 | 8,099.2    | 7,498.1   | 9,199.4  | 13,999.1 | 13,999.1 | 14,599.2  | 10,896.8  | 18,696.1   | 10,999.5 | 18,497.3 | 20,297.5  | 15,296.0           | 11,399.5 |
| GenomesT    | 6,594.4    | 70,996.2 | 89,999.7  | 82,510.0 | 40,499.6 | 35,999.3 | 79,299.3 | 73,499.7 | 64,799.5 | 11,699.5 | 19,799.5 | 44,992.2 | 92,999.6 | 82,899.6  | 22,899.9  | 31,399.9 | 50,999.7  | 81,799.6    | 78,199.5 | 69,199.8 | 14,795.8 | 23,999.4 | 26,090.4 | 25,395.6 | 35,999.7 | 24,499.2   | 26,499.9  | 25,899.6 | 23,899.6 | 23,895.2 | 22,999.6  | 23,895.2  | 23,895.2   | 23,895.2 | 23,895.2 | 23,895.2  | 23,895.2           | 23,895.2 |
| GRDSS-6     | 12,366.2   | 13,499.9 | 25,995.2  | 25,295.4 | 6,290.0  | 6,795.2  | 27,993.1 | 18,699.8 | 16,999.6 | 15,999.9 | 14,795.8 | 23,999.3 | 26,090.4 | 25,395.6  | 25,499.4  | 26,499.2 | 25,899.9  | 20,999.9    | 19,899.7 | 17,798.1 | 6,074.8  | 10,499.1 | 12,599.0 | 18,299.5 | 18,299.5 | 13,899.6   | 11,095.5  | 19,598.8 | 23,895.2 | 22,999.6 | 18,299.7  | 18,299.7  | 18,299.7   | 18,299.7 | 18,299.7 | 18,299.7  | 18,299.7           |          |
| Hydra-sv7   | 72,253.8   | 5,697.3  | 6,293.1   | 5,498.6  | 4,293.2  | 5,286.0  | 7,668.2  | 1,110.0  | 29,572.5 | 5,189.3  | 1,675.8  | 55,050.1 | 7,787.0  | 4,391.8   | 4,592.1   | 6,884.7  | 4,498.3   | 70,253.6    | 4,695.2  | 72,053.0 | 5,992.8  | 55,898.7 | 50,994.5 | 30,266.1 | 5,590.0  | 72,951.6   | 25,898.5  | 4,986.8  | 11,577.7 | 25,788.8 | 2,310.0   | 5,932.8   | 4,935.5    | 3,694.1  | 57,864.2 | 17,697.8  | 13,386.7           | 6,594.4  |
| inGAP-sv7   | 11,590.1   | 11,776.3 | 11,886.9  | 9,284.8  | 9,186.7  | 9,195.1  | 9,076.0  | 5,480.4  | 4,152.1  | 5,651.1  | 17,780.4 | 5,786.2  | 4,494.5  | 8,570.6   | 10,861.0  | 10,890.2 | 18,369.1  | 8,293.6     | 26,184.2 | 21,170.6 | 14,993.3 | 18,378.8 | 17,694.0 | 8,888.4  | 25,898.5 | 7,668.7    | 6,831.9   | 13,075.4 | 3,597.9  | 2,874.4  | 10,066.6  | 9,486.6   | 7,590.5    | 15,794.0 | 14,293.6 | 13,079.9  | 12,366.2           |          |
| Lumpy-6     | 6,293.1    | 5,498.6  | 4,293.2   | 5,286.0  | 7,668.2  | 1,110.0  | 29,572.5 | 5,189.3  | 1,675.8  | 5,651.1  | 17,780.4 | 5,786.2  | 4,494.5  | 8,570.6   | 10,861.0  | 10,890.2 | 18,369.1  | 8,293.6     | 26,184.2 | 21,170.6 | 14,993.3 | 18,378.8 | 17,694.0 | 8,888.4  | 25,898.5 | 7,668.7    | 6,831.9   | 13,075.4 | 3,597.9  | 2,874.4  | 10,066.6  | 9,486.6   | 7,590.5    | 15,794.0 | 14,293.6 | 13,079.9  | 12,366.2           |          |
| Manta3      | 11,590.1   | 11,776.3 | 11,886.9  | 9,284.8  | 9,186.7  | 9,195.1  | 9,076.0  | 5,480.4  | 4,152.1  | 5,651.1  | 17,780.4 | 5,786.2  | 4,494.5  | 8,570.6   | 10,861.0  | 10,890.2 | 18,369.1  | 8,293.6     | 26,184.2 | 21,170.6 | 14,993.3 | 18,378.8 | 17,694.0 | 8,888.4  | 25,898.5 | 7,668.7    | 6,831.9   | 13,075.4 | 3,597.9  | 2,874.4  | 10,066.6  | 9,486.6   | 7,590.5    | 15,794.0 | 14,293.6 | 13,079.9  | 12,366.2           |          |
| MATCHCLIP-4 | 4,293.2    | 5,286.0  | 7,668.2   | 1,110.0  | 29,572.5 | 5,189.3  | 1,675.8  | 5,651.1  | 17,780.4 | 5,786.2  | 4,494.5  | 8,570.6  | 10,861.0 | 10,890.2  | 18,369.1  | 8,293.6  | 26,184.2  | 21,170.6    | 14,993.3 | 18,378.8 | 17,694.0 | 8,888.4  | 25,898.5 | 7,668.7  | 6,831.9  | 13,075.4   | 3,597.9   | 2,874.4  | 10,066.6 | 9,486.6  | 7,590.5   | 15,794.0  | 14,293.6   | 13,079.9 | 12,366.2 |           |                    |          |
| Meerkat7    | 5,286.0    | 6,831.9  | 7,668.2   | 1,110.0  | 29,572.5 | 5,189.3  | 1,675.8  | 5,651.1  | 17,780.4 | 5,786.2  | 4,494.5  | 8,570.6  | 10,861.0 | 10,890.2  | 18,369.1  | 8,293.6  | 26,184.2  | 21,170.6    | 14,993.3 | 18,378.8 | 17,694.0 | 8,888.4  | 25,898.5 | 7,668.7  | 6,831.9  | 13,075.4   | 3,597.9   | 2,874.4  | 10,066.6 | 9,486.6  | 7,590.5   | 15,794.0  | 14,293.6   | 13,079.9 | 12,366.2 |           |                    |          |
| MetaSV3     | 7,668.2    | 1,110.0  | 29,572.5  | 5,189.3  | 1,675.8  | 5,651.1  | 17,780.4 | 5,786.2  | 4,494.5  | 8,570.6  | 10,861.0 | 10,890.2 | 18,369.1 | 8,293.6   | 26,184.2  | 21,170.6 | 14,993.3  | 18,378.8    | 17,694.0 | 8,888.4  | 25,898.5 | 7,668.7  | 6,831.9  | 13,075.4 | 3,597.9  | 2,874.4    | 10,066.6  | 9,486.6  | 7,590.5  | 15,794.0 | 14,293.6  | 13,079.9  | 12,366.2   |          |          |           |                    |          |
| pbsv3       | 9,186.7    | 9,195.1  | 9,076.0   | 5,480.4  | 4,152.1  | 5,651.1  | 17,780.4 | 5,786.2  | 4,494.5  | 8,570.6  | 10,861.0 | 10,890.2 | 18,369.1 | 8,293.6   | 26,184.2  | 21,170.6 | 14,993.3  | 18,378.8    | 17,694.0 | 8,888.4  | 25,898.5 | 7,668.7  | 6,831.9  | 13,075.4 | 3,597.9  | 2,874.4    | 10,066.6  | 9,486.6  | 7,590.5  | 15,794.0 | 14,293.6  | 13,079.9  | 12,366.2   |          |          |           |                    |          |
| PennCNV     | 29,572.5   | 5,189.3  | 1,675.8   | 5,651.1  | 17,780.4 | 5,786.2  | 4,494.5  | 8,570.6  | 10,861.0 | 10,890.2 | 18,369.1 | 8,293.6  | 26,184.2 | 21,170.6  | 14,993.3  | 18,378.8 | 17,694.0  | 8,888.4     | 25,898.5 | 7,668.7  | 6,831.9  | 13,075.4 | 3,597.9  | 2,874.4  | 10,066.6 | 9,486.6    | 7,590.5   | 15,794.0 | 14,293.6 | 13,079.9 | 12,366.2  |           |            |          |          |           |                    |          |
| Pindel4     | 5,189.3    | 1,675.8  | 5,651.1   | 17,780.4 | 5,786.2  | 4,494.5  | 8,570.6  | 10,861.0 | 10,890.2 | 18,369.1 | 8,293.6  | 26,184.2 | 21,170.6 | 14,993.3  | 18,378.8  | 17,694.0 | 8,888.4   | 25,898.5    | 7,668.7  | 6,831.9  | 13,075.4 | 3,597.9  | 2,874.4  | 10,066.6 | 9,486.6  | 7,590.5    | 15,794.0  | 14,293.6 | 13,079.9 | 12,366.2 |           |           |            |          |          |           |                    |          |
| PRISM3      | 1,675.8    | 5,651.1  | 17,780.4  | 5,786.2  | 4,494.5  | 8,570.6  | 10,861.0 | 10,890.2 | 18,369.1 | 8,293.6  | 26,184.2 | 21,170.6 | 14,993.3 | 18,378.8  | 17,694.0  | 8,888.4  | 25,898.5  | 7,668.7     | 6,831.9  | 13,075.4 | 3,597.9  | 2,874.4  | 10,066.6 | 9,486.6  | 7,590.5  | 15,794.0   | 14,293.6  | 13,079.9 | 12,366.2 |          |           |           |            |          |          |           |                    |          |
| RAPTR-10    | 17,780.4   | 5,786.2  | 4,494.5   | 8,570.6  | 10,861.0 | 10,890.2 | 18,369.1 | 8,293.6  | 26,184.2 | 21,170.6 | 14,993.3 | 18,378.8 | 17,694.0 | 8,888.4   | 25,898.5  | 7,668.7  | 6,831.9</ |             |          |          |          |          |          |          |          |            |           |          |          |          |           |           |            |          |          |           |                    |          |

| Algorithm      | 1-2-3-SV7 | BicSeq2  | BreakPa ncer3 | CNVator3 | Control-FREEC3 | CREST-5 | DELLY   | ERDS-3  | FemKit5 | JonesSV5 | GASPro5 | Genome STRIP-4 | GRDSS8  | HydraSV | CopyCat2 | 4-MyA4  | Mantra-3 | Maskat5 | MelSV5  | OncosN V-SEQ3 | PennCN V-Seq3 | Pindel4 | PRISM-3 | RAPTR-4 | readDepth5 | SoftSV3 | SvABA-3 | SVDetect-4 | SVelter-3 | SVnnder | SVseq2-8 | TIDDT-3 | Utils5  | Variation Hunter-8 | Wham-3  |         |         |         |         |         |         |
|----------------|-----------|----------|---------------|----------|----------------|---------|---------|---------|---------|----------|---------|----------------|---------|---------|----------|---------|----------|---------|---------|---------------|---------------|---------|---------|---------|------------|---------|---------|------------|-----------|---------|----------|---------|---------|--------------------|---------|---------|---------|---------|---------|---------|---------|
| 1-2-3-SV7      | 91.5797   | 126.2964 | 4.8100        | 35.9595  | 45.7865        | 1.8755  | 6.0714  | 4.2100  | 3.0833  | 59.0980  | 20.4918 | 9.0750         | 5.4900  | 89.1857 | 2.4666   | 5.4818  | 4.2875   | 4.8571  | 11.4100 | 5.4100        | 31.9000       | 3.6500  | 1.8500  | 0.8400  | 86.1911    | 0.6100  | 9.0500  | 4.8815     | 5.4642    | 4.2777  | 91.5806  | 3.8857  | 91.5802 | 3.0555             | 59.6900 | 42.7853 | 33.7949 | 4.8100  |         |         |         |
| BicSeq2        | 11.2028   | 4.1011   | 1.8239        | 2.6679   | 4.1100         | 0.5500  | 3.1194  | 3.1708  | 1.3054  | 4.4100   | 3.9200  | 4.4200         | 4.1275  | 6.2293  | 3.1100   | 3.3221  | 3.3821   | 2.9210  | 1.8369  | 4.4858        | 1.8917        | 2.6161  | 0.8448  | 5.2183  | 0.3250     | 1.7499  | 2.1155  | 3.6203     | 2.8330    | 10.0265 | 1.07229  | 1.0258  | 5.4827  | 5.7413             | 5.9944  | 1.8939  |         |         |         |         |         |
| CNVator3       | 16.2964   | 4.3061   | 4.3392        | 3.9166   | 8.7660         | 14.4366 | 43.9924 | 43.9910 | 31.4922 | 40.3837  | 44.5925 | 44.5925        | 44.5925 | 44.5925 | 44.5925  | 7.2750  | 4.3392   | 4.3392  | 41.5949 | 43.9924       | 9.6800        | 34.3824 | 46.2766 | 19.2966 | 4.8533     | 37.3911 | 42.7934 | 43.9924    | 40.9181   | 46.9977 | 33.8616  | 45.7987 | 3.0278  | 45.1677            | 44.5966 | 21.0522 | 40.9918 |         |         |         |         |
| BSecQnvr3      | 4.8100    | 5.7628   | 1.5100        | 2.8729   | 3.1742         | 5.5000  | 1.5100  | 2.3100  | 0.3250  | 3.6100   | 1.5100  | 3.1100         | 8.2810  | 1.5750  | 2.6867   | 1.8100  | 1.8100   | 1.8100  | 4.7872  | 1.8575        | 1.0750        | 0.5500  | 2.6100  | 5.2600  | 5.2600     | 10.0667 | 2.1750  | 2.8100     | 1.3100    | 42.1000 | 0.5250   | 2.6100  | 0.3333  | 3.9100             | 3.1100  | 0.8500  | 0.5600  |         |         |         |         |
| Control-FREEC3 | 18.2539   | 1.9150   | 5.7325        | 2.8100   | 3.1100         | 0.3250  | 5.2424  | 4.1100  | 2.8629  | 3.3100   | 3.4349  | 5.7389         | 5.4058  | 3.9482  | 2.3100   | 5.7408  | 4.9453   | 2.8625  | 2.8625  | 3.4100        | 1.0500        | 2.8316  | 1.8517  | 3.9389  | 0.0000     | 51.1200 | 2.8472  | 4.6539     | 5.2485    | 4.9439  | 2.3100   | 5.2389  | 1.7772  | 4.6100             | 4.7606  | 3.1327  | 3.1668  |         |         |         |         |
| CREST-5        | 35.9595   | 1.9876   | 56.0968       | 48.3962  | 43.9924        | 0.0000  | 56.0968 | 53.0967 | 60.2090 | 60.2090  | 60.2090 | 60.2090        | 60.2090 | 60.2090 | 60.2090  | 54.8906 | 54.8906  | 54.8906 | 60.2090 | 54.8906       | 54.8906       | 54.8906 | 54.8906 | 54.8906 | 54.8906    | 54.8906 | 54.8906 | 54.8906    | 54.8906   | 54.8906 | 54.8906  | 54.8906 | 54.8906 | 54.8906            | 54.8906 | 54.8906 | 54.8906 | 54.8906 | 54.8906 | 54.8906 |         |
| DELLY          | 1.8100    | 3.1174   | 1.5100        | 5.2424   | 4.8628         | 0.0000  | 2.8938  | 4.4866  | 2.0100  | 4.1838   | 2.0792  | 3.4825         | 3.6725  | 2.6663  | 3.7509   | 3.1938  | 3.1100   | 2.3767  | 3.6100  | 5.4700        | 3.1600        | 2.8875  | 1.3875  | 5.5839  | 0.3250     | 1.3100  | 3.9917  | 3.3804     | 2.6833    | 6.2881  | 2.3938   | 4.9708  | 1.1700  | 4.4950             | 3.6833  | 3.6684  | 1.5875  |         |         |         |         |
| ERDS-3         | 4.2100    | 43.9901  | 72.2983       | 53.0967  | 5.4900         | 24.6100 | 76.5992 | 78.9632 | 57.2989 | 89.9434  | 19.8100 | 75.9992        | 75.9992 | 75.9992 | 72.923   | 74.6992 | 74.0991  | 71.0991 | 74.0991 | 10.2944       | 60.8961       | 71.6991 | 21.6991 | 74.0991 | 3.6100     | 68.0991 | 74.6100 | 75.9992    | 72.2991   | 78.9894 | 59.0898  | 77.7992 | 82.6100 | 75.9992            | 75.9992 | 29.5998 | 70.4999 |         |         |         |         |
| FemKit5        | 3.0833    | 3.0189   | 63.2981       | 43.9964  | 3.6100         | 24.6100 | 65.0991 | 57.2989 | 66.5990 | 53.6956  | 15.0100 | 65.0990        | 65.0990 | 64.9990 | 42.1000  | 64.9990 | 65.0990  | 59.6939 | 62.6991 | 5.4900        | 48.7897       | 61.4990 | 27.7100 | 63.2990 | 2.4100     | 61.4990 | 63.8100 | 65.0990    | 63.8990   | 65.0990 | 50.0988  | 65.0990 | 59.6100 | 63.2990            | 65.0990 | 56.9757 | 63.8900 |         |         |         |         |
| Genome STRIP-4 | 1.3954    | 0.3265   | 2.8629        | 2.8629   | 2.8629         | 3.6100  | 0.3250  | 5.8667  | 3.1100  | 3.1500   | 2.1750  | 2.0525         | 2.8632  | 2.8647  | 1.6900   | 4.2100  | 2.8688   | 2.8688  | 2.8688  | 3.1883        | 1.8750        | 1.5000  | 1.5442  | 2.7200  | 0.0000     | 0.3333  | 2.0663  | 2.3667     | 2.8629    | 2.8629  | 2.8629   | 3.1642  | 1.1700  | 3.1100             | 2.8750  | 1.8483  | 2.6875  |         |         |         |         |
| GRDSS8         | 59.0980   | 4.3813   | 63.2981       | 60.2090  | 4.8888         | 22.2944 | 71.6952 | 69.9434 | 65.9965 | 72.8487  | 16.8965 | 81.4935        | 58.9332 | 72.2975 | 6.6785   | 58.4932 | 59.0933  | 57.8932 | 7.2857  | 51.2904       | 57.2922       | 27.7984 | 69.9438 | 3.0100  | 53.0987    | 57.8932 | 59.6916 | 57.2931    | 74.6968   | 45.7938 | 73.4976  | 51.2934 | 68.6942 | 65.6923            | 27.7978 | 56.0932 | 59.0980 |         |         |         |         |
| HydraSV        | 20.4918   | 12.6290  | 21.8100       | 16.8100  | 23.0100        | 14.4100 | 22.8926 | 19.8100 | 15.0100 | 16.8985  | 22.8926 | 22.8926        | 22.8926 | 22.8926 | 12.7000  | 21.8947 | 22.2973  | 19.8100 | 21.0000 | 21.8947       | 21.8947       | 9.6100  | 21.8100 | 0.0000  | 18.6968    | 21.0944 | 22.2973 | 22.2973    | 22.2973   | 13.2995 | 22.8926  | 15.9992 | 22.8926 | 3.6100             | 21.0972 | 2.0555  | 1.0100  | 0.3333  | 0.0000  |         |         |
| JonesSV5       | 9.0750    | 4.4200   | 3.9100        | 2.8100   | 3.1100         | 0.3250  | 5.0500  | 0.3250  | 0.3250  | 0.3250   | 0.3250  | 0.3250         | 0.3250  | 0.3250  | 0.3250   | 0.3250  | 0.3250   | 0.3250  | 0.3250  | 0.3250        | 0.3250        | 0.3250  | 0.3250  | 0.3250  | 0.3250     | 0.3250  | 0.3250  | 0.3250     | 0.3250    | 0.3250  | 0.3250   | 0.3250  | 0.3250  | 0.3250             | 0.3250  | 0.3250  | 0.3250  | 0.3250  |         |         |         |
| Maskat5        | 89.1857   | 2.4666   | 5.4818        | 4.2875   | 4.8571         | 11.4100 | 5.4100  | 31.9000 | 3.6500  | 1.8500   | 0.8400  | 86.1911        | 0.6100  | 9.0500  | 4.8815   | 5.4642  | 4.2777   | 91.5806 | 3.8857  | 91.5802       | 3.0555        | 59.6900 | 42.7853 | 33.7949 | 4.8100     | 11.2028 | 4.1011  | 1.8239     | 2.6679    | 4.1100  | 0.5500   | 3.1194  | 3.1708  | 1.3054             | 4.4100  | 3.9200  | 4.4200  | 4.1275  | 6.2293  | 3.1100  |         |
| MelSV5         | 43.9924   | 43.9924  | 43.9924       | 43.9924  | 43.9924        | 43.9924 | 43.9924 | 43.9924 | 43.9924 | 43.9924  | 43.9924 | 43.9924        | 43.9924 | 43.9924 | 43.9924  | 43.9924 | 43.9924  | 43.9924 | 43.9924 | 43.9924       | 43.9924       | 43.9924 | 43.9924 | 43.9924 | 43.9924    | 43.9924 | 43.9924 | 43.9924    | 43.9924   | 43.9924 | 43.9924  | 43.9924 | 43.9924 | 43.9924            | 43.9924 | 43.9924 | 43.9924 | 43.9924 | 43.9924 | 43.9924 |         |
| OncosN V-SEQ3  | 31.9100   | 34.3824  | 46.2766       | 19.2966  | 4.8533         | 37.3911 | 42.7934 | 43.9924 | 40.9181 | 46.9977  | 33.8616 | 45.7987        | 3.0278  | 45.1677 | 44.5966  | 21.0522 | 40.9918  | 46.9977 | 33.8616 | 45.7987       | 3.0278        | 45.1677 | 44.5966 | 21.0522 | 40.9918    | 46.9977 | 33.8616 | 45.7987    | 3.0278    | 45.1677 | 44.5966  | 21.0522 | 40.9918 | 46.9977            | 33.8616 | 45.7987 | 3.0278  | 45.1677 | 44.5966 | 21.0522 | 40.9918 |
| PennCN V-Seq3  | 3.6100    | 1.8100   | 4.7872        | 1.8575   | 1.0750         | 0.5500  | 2.6100  | 5.2600  | 10.0667 | 2.1750   | 2.8100  | 1.3100         | 42.1000 | 0.5250  | 2.6100   | 0.3333  | 3.9100   | 3.1100  | 0.8500  | 0.5600        | 1.8939        | 1.8100  | 0.5600  | 1.8939  | 1.8100     | 0.5600  | 1.8939  | 1.8100     | 0.5600    | 1.8939  | 1.8100   | 0.5600  | 1.8939  | 1.8100             | 0.5600  | 1.8939  | 1.8100  | 0.5600  | 1.8939  | 1.8100  | 0.5600  |
| Pindel4        | 1.8100    | 3.1174   | 1.5100        | 5.2424   | 4.8628         | 0.0000  | 2.8938  | 4.4866  | 2.0100  | 4.1838   | 2.0792  | 3.4825         | 3.6725  | 2.6663  | 3.7509   | 3.1938  | 3.1100   | 2.3767  | 3.6100  | 5.4700        | 3.1600        | 2.8875  | 1.3875  | 5.5839  | 0.3250     | 1.3100  | 3.9917  | 3.3804     | 2.6833    | 6.2881  | 2.3938   | 4.9708  | 1.1700  | 4.4950             | 3.6833  | 3.6684  | 1.5875  |         |         |         |         |
| PRISM-3        | 1.8100    | 3.1174   | 1.5100        | 5.2424   | 4.8628         | 0.0000  | 2.8938  | 4.4866  | 2.0100  | 4.1838   | 2.0792  | 3.4825         | 3.6725  | 2.6663  | 3.7509   | 3.1938  | 3.1100   | 2.3767  | 3.6100  | 5.4700        | 3.1600        | 2.8875  | 1.3875  | 5.5839  | 0.3250     | 1.3100  | 3.9917  | 3.3804     | 2.6833    | 6.2881  | 2.3938   | 4.9708  | 1.1700  | 4.4950             | 3.6833  | 3.6684  | 1.5875  |         |         |         |         |
| RAPTR-4        | 0.6100    | 4.8533   | 5.4900        | 4.2875   | 4.8100         | 1.2100  | 4.2875  | 5.6100  | 2.4100  | 3.0100   | 0.0000  | 0.0000         | 0.0000  | 0.0000  | 0.0000   | 0.0000  | 0.0000   | 0.0000  | 0.0000  | 0.0000        | 0.0000        | 0.0000  | 0.0000  | 0.0000  | 0.0000     | 0.0000  | 0.0000  | 0.0000     | 0.0000    | 0.0000  | 0.0000   | 0.0000  | 0.0000  | 0.0000             | 0.0000  | 0.0000  | 0.0000  | 0.0000  |         |         |         |
| readDepth5     | 9.0500    | 37.3911  | 74.0968       | 51.2944  | 6.6100         | 27.7100 | 77.7977 | 68.0991 | 61.4990 | 53.0989  | 16.8968 | 77.7977        | 77.1984 | 12.6488 | 31.9929  | 75.9976 | 75.9976  | 75.9976 | 75.9976 | 75.9976       | 75.9976       | 75.9976 | 75.9976 | 75.9976 | 75.9976    | 75.9976 | 75.9976 | 75.9976    | 75.9976   | 75.9976 | 75.9976  | 75.9976 | 75.9976 | 75.9976            | 75.9976 | 75.9976 | 75.9976 | 75.9976 | 75.9976 |         |         |
| SoftSV3        | 1.8100    | 3.1174   | 1.5100        | 5.2424   | 4.8628         | 0.0000  | 2.8938  | 4.4866  | 2.0100  | 4.1838   | 2.0792  | 3.4825         | 3.6725  | 2.6663  | 3.7509   | 3.1938  | 3.1100   | 2.3767  | 3.6100  | 5.4700        | 3.1600        | 2.8875  | 1.3875  | 5.5839  | 0.3250     | 1.3100  | 3.9917  | 3.3804     | 2.6833    | 6.2881  | 2.3938   | 4.9708  | 1.1700  | 4.4950             | 3.6833  | 3.6684  | 1.5875  |         |         |         |         |
| SvABA-3        | 4.2777    | 40.9918  | 75.9976       | 52.4965  | 5.4100         | 28.9100 | 85.5979 | 72.2989 | 63.9990 | 57.2983  | 22.9731 | 85.5979        | 84.8979 | 8.4888  | 34.9883  | 31.9100 | 31.9100  | 31.9100 | 31.9100 | 31.9100       | 31.9100       | 31.9100 | 31.9100 | 31.9100 | 31.9100    | 31.9100 | 31.9100 | 31.9100    | 31.9100   | 31.9100 | 31.9100  | 31.9100 | 31.9100 | 31.9100            | 31.9100 | 31.9100 | 31.9100 | 31.9100 | 31.9100 |         |         |
| SVDetect-4     | 91.6265   | 46.9797  | 83.7965       | 75.9633  | 7.2923         | 30.7100 | 89.1948 | 78.9898 | 66.6990 | 74.6968  | 22.8950 | 89.7965        | 89.7965 | 89.7965 | 40.3971  | 86.7872 | 87.3973  | 83.7885 | 83.7885 | 83.7885       | 83.7885       | 83.7885 | 83.7885 | 83.7885 | 83.7885    | 83.7885 | 83.7885 | 83.7885    | 83.7885   | 83.7885 | 83.7885  | 83.7885 | 83.7885 | 83.7885            | 83.7885 | 83.7885 | 83.7885 | 83.7885 | 83.7885 |         |         |
| SVelter-3      | 31.6557   | 33.7811  | 62.0962       | 40.9976  | 1.2100         | 21.6100 | 62.0971 | 59.0988 | 50.0988 | 45.7938  | 13.2966 | 62.0971        |         |         |          |         |          |         |         |               |               |         |         |         |            |         |         |            |           |         |          |         |         |                    |         |         |         |         |         |         |         |

| Algorithm   | DELLY:3               | GRIDSS:7               | Lumpy:4               | Manta:4               | MATCHCLIP:7            | Meerkat:8             | MetaSV:6              | Pindel:3               | Sniffles:3            | SoftSV:3               | SvABA:3                | Wham:6                 |
|-------------|-----------------------|------------------------|-----------------------|-----------------------|------------------------|-----------------------|-----------------------|------------------------|-----------------------|------------------------|------------------------|------------------------|
| DELLY:3     | 28.9/69.4<br>5.9/15.3 | 27.9/83.7<br>2.0/24.6  | 27.9/83.0<br>2.1/18.1 | 26.9/99.0<br>1.4/33.9 | 21.4/80.6<br>1.7/31.5  | 25.5/96.9<br>1.1/52.3 | 25.0/92.9<br>0.7/25.1 | 27.9/87.2<br>1.5/22.0  | 22.2/100<br>0.4/40.0  | 28.4/84.6<br>2.6/24.1  | 27.6/84.2<br>3.5/19.8  | 26.0/96.9<br>1.2/40.0  |
| GRIDSS:7    | 27.9/83.7<br>2.0/24.6 | 31.3/51.3<br>15.5/51.6 | 29.5/75.1<br>6.6/47.1 | 29.6/99.0<br>6.3/63.9 | 22.8/73.6<br>7.8/70.9  | 25.2/96.8<br>0.9/58.0 | 27.4/84.8<br>5.9/65.7 | 30.6/81.8<br>7.6/65.2  | 22.2/100<br>0.3/51.5  | 30.8/80.2<br>8.9/63.8  | 29.8/83.3<br>8.6/52.2  | 29.0/95.5<br>8.5/74.7  |
| Lumpy:4     | 27.9/83.0<br>2.1/18.1 | 29.5/75.1<br>6.6/47.1  | 29.8/70.9<br>7.7/36.5 | 28.2/99.0<br>4.6/46.9 | 22.8/79.2<br>5.2/61.6  | 25.0/97.8<br>1.0/57.1 | 26.3/88.9<br>4.6/58.5 | 29.2/88.5<br>5.6/55.6  | 22.5/100<br>0.2/30.9  | 29.5/90.0<br>5.0/46.0  | 28.4/87.5<br>5.7/37.2  | 27.7/96.2<br>5.4/65.1  |
| Manta:4     | 26.9/99.0<br>1.4/33.9 | 29.6/99.0<br>6.3/63.9  | 28.2/99.0<br>4.6/46.9 | 30.1/98.2<br>7.4/54.9 | 22.0/100<br>4.5/73.7   | 24.7/98.9<br>0.9/63.1 | 26.6/98.9<br>4.1/58.7 | 29.3/99.0<br>5.2/61.0  | 22.0/100<br>0.2/44.0  | 29.8/99.0<br>5.4/65.4  | 28.8/99.0<br>4.8/50.9  | 27.9/99.0<br>5.9/77.6  |
| MATCHCLIP:7 | 21.4/80.6<br>1.7/31.5 | 22.8/73.6<br>7.8/70.9  | 22.8/79.2<br>5.2/61.6 | 22.0/100<br>4.5/73.7  | 23.9/54.6<br>13.1/55.8 | 19.8/98.6<br>0.5/37.7 | 22.0/83.5<br>5.3/69.0 | 23.6/77.6<br>6.6/60.3  | 17.6/100<br>0.3/57.1  | 23.9/68.2<br>8.1/65.8  | 23.6/85.2<br>7.9/63.9  | 23.0/96.5<br>6.0/77.0  |
| Meerkat:8   | 25.5/96.9<br>1.1/52.3 | 25.2/96.8<br>0.9/58.0  | 25.0/97.8<br>1.0/57.1 | 24.7/98.9<br>0.9/63.1 | 19.8/98.6<br>0.5/37.7  | 25.5/96.9<br>1.2/30.6 | 22.2/97.6<br>0.4/65.7 | 24.7/97.8<br>0.7/67.0  | 20.6/100<br>0.2/42.2  | 25.2/96.8<br>0.9/29.5  | 24.7/98.9<br>1.0/29.8  | 23.3/100<br>0.7/71.5   |
| MetaSV:6    | 25.0/92.9<br>0.7/25.1 | 27.4/84.8<br>5.9/65.7  | 26.3/88.9<br>4.6/58.5 | 26.6/98.9<br>4.1/58.7 | 22.0/83.5<br>5.3/69.0  | 22.2/97.6<br>0.4/65.7 | 29.3/54.8<br>9.1/45.0 | 29.3/55.1<br>9.1/45.1  | 19.8/100<br>0.1/66.7  | 28.8/89.8<br>6.1/65.6  | 27.4/93.5<br>5.6/54.8  | 26.9/99.0<br>5.4/76.3  |
| Pindel:3    | 27.9/87.2<br>1.5/22.0 | 30.6/81.8<br>7.6/65.2  | 29.2/88.5<br>5.6/55.6 | 29.3/99.0<br>5.2/61.0 | 23.6/77.6<br>6.6/60.3  | 24.7/97.8<br>0.7/67.0 | 29.3/55.1<br>9.1/45.1 | 32.3/33.0<br>15.1/29.4 | 22.0/100<br>0.3/66.7  | 31.9/84.2<br>8.1/51.6  | 30.3/88.8<br>7.4/51.0  | 29.3/98.1<br>6.5/78.1  |
| Sniffles:3  | 22.2/100<br>0.4/40.0  | 22.2/100<br>0.3/51.5   | 22.5/100<br>0.2/30.9  | 22.0/100<br>0.2/44.0  | 17.6/100<br>0.3/57.1   | 20.6/100<br>0.2/42.2  | 19.8/100<br>0.1/66.7  | 22.0/100<br>0.3/66.7   | 24.4/96.8<br>2.1/41.7 | 23.3/100<br>0.4/70.8   | 22.8/100<br>0.8/62.4   | 21.4/100<br>0.2/66.7   |
| SoftSV:3    | 28.4/84.6<br>2.6/24.1 | 30.8/80.2<br>8.9/63.8  | 29.5/90.0<br>5.0/46.0 | 29.8/99.0<br>5.4/65.4 | 23.9/68.2<br>8.1/65.8  | 25.2/96.8<br>0.9/29.5 | 28.8/89.8<br>6.1/65.6 | 31.9/84.2<br>8.1/51.6  | 23.3/100<br>0.4/70.8  | 33.3/33.4<br>39.3/25.8 | 31.1/88.4<br>8.8/49.1  | 29.8/95.6<br>7.6/72.6  |
| SvABA:3     | 27.6/84.2<br>3.5/19.8 | 29.8/83.3<br>8.6/52.2  | 28.4/87.5<br>5.7/37.2 | 28.8/99.0<br>4.8/50.9 | 23.6/85.2<br>7.9/63.9  | 24.7/98.9<br>1.0/29.8 | 27.4/93.5<br>5.6/54.8 | 30.3/88.8<br>7.4/51.0  | 22.8/100<br>0.8/62.4  | 31.1/88.4<br>8.8/49.1  | 31.7/71.3<br>18.6/36.4 | 28.5/95.4<br>5.6/73.6  |
| Wham:6      | 26.0/96.9<br>1.2/40.0 | 29.0/95.5<br>8.5/74.7  | 27.7/96.2<br>5.4/65.1 | 27.9/99.0<br>5.9/77.6 | 23.0/96.5<br>6.0/77.0  | 23.3/100<br>0.7/71.5  | 26.9/99.0<br>5.4/76.3 | 29.3/98.1<br>6.5/78.1  | 21.4/100<br>0.2/66.7  | 29.8/95.6<br>7.6/72.6  | 28.5/95.4<br>5.6/73.6  | 30.1/86.7<br>11.7/65.4 |

**Figure S19. Recall and precision of SVs commonly called between a pair of SV detection algorithms for the DUP-S category.** DUPs in the short size-range (100 bp–1 Kb), called using the indicated algorithms, were filtered with the minimum number of reads supporting the called SVs, indicated with the suffix number of the algorithm name. The DUPs overlapping between the filtered SV sets from a pair of the indicated algorithms were selected, and the recall and precision of the selected DUPs were determined. Recall and precision percentages are presented as in Figure S15. The data contained in the top 20th percentile of the combined precision scores for the simulated and real data are highlighted with a red background, and the next data contained in the top 21st–50th percentile of the combined precision scores are shown with a pale red background.

| Algorithm     | BICseq2:8             | CNVnator4             | DELLY:3               | ERDS:3                | forestSV:4            | GRIDSS:6              | iCopyDAV:3            | Lumpy:7               | Manta:4               | Meerkat:8             | MetaSV:6              | PennCNV-Seq:3         | Pindel:5              | RAPTR:5               | readDepth:6           | Sniffles:3            | SoftSV:3              | SVDetect:6            | TIDDIT:3              | Ulysses:3             | Wham:6                |
|---------------|-----------------------|-----------------------|-----------------------|-----------------------|-----------------------|-----------------------|-----------------------|-----------------------|-----------------------|-----------------------|-----------------------|-----------------------|-----------------------|-----------------------|-----------------------|-----------------------|-----------------------|-----------------------|-----------------------|-----------------------|-----------------------|
| BICseq2:8     | 32.3/65.7<br>2.9/22.3 | 16.1/94.4<br>0.6/67.7 | 30.4/97.1<br>0.6/40.8 | 6.5/79.5<br>1.4/38.0  | 13.5/69.4<br>1.1/29.9 | 30.2/97.3<br>0.5/57.2 | 12.5/79.0<br>0.5/30.2 | 29.5/97.1<br>0.3/54.4 | 29.5/97.6<br>0.3/69.4 | 29.3/98.0<br>0.2/78.3 | 24.6/96.1<br>0.6/63.6 | 10.0/80.7<br>0.6/25.4 | 26.2/97.6<br>0.3/50.3 | 2.1/72.3<br>0/4.2     | 17.2/81.0<br>1.0/43.2 | 24.4/96.9<br>0.1/13.9 | 30.4/97.8<br>0.2/49.7 | 2.2/71.0<br>0.2/31.9  | 1.7/61.9<br>0.1/41.7  | 30.0/94.9<br>0.6/31.9 | 28.6/97.6<br>0.2/62.0 |
| CNVnator:4    | 16.1/94.4<br>0.6/67.7 | 24.2/91.3<br>2.4/40.1 | 14.0/99.0<br>0.1/100  | 8.5/93.1<br>1.4/49.3  | 6.7/89.7<br>1.0/38.0  | 13.8/99.0<br>0.5/0.0  | 14.9/94.5<br>0.5/41.4 | 13.0/99.3<br>0/50.0   | 13.4/99.0<br>0/50.0   | 13.6/99.6<br>0.25/0   | 14.4/89.8<br>1.6/42.6 | 6.6/89.6<br>0.3/39.7  | 13.5/99.0<br>0/25.0   | 7.2/98.1<br>0/0       | 14.5/91.7<br>0.7/67.0 | 10.6/97.9<br>0/33.3   | 14.1/98.7<br>0.25/0   | 8.0/98.3<br>0.1/75.0  | 4.8/98.1<br>0.1/75.0  | 14.2/98.1<br>0.1/87.5 | 12.5/99.2<br>0/25.0   |
| DELLY:3       | 30.4/97.1<br>0.6/40.8 | 24.0/99.0<br>0.1/100  | 40.8/98.2<br>1.8/12.7 | 7.5/95.4<br>0.5/37.9  | 15.6/95.5<br>0.3/39.9 | 39.4/98.6<br>1.0/18.8 | 13.9/97.1<br>0/5.3    | 37.1/98.7<br>0.9/18.0 | 37.7/99.2<br>0.9/19.1 | 37.7/99.1<br>0.4/37.3 | 28.5/99.3<br>0.4/22.8 | 13.3/97.6<br>0.1/22.2 | 30.9/99.2<br>0.6/14.8 | 1.3/80.5<br>0.2/7.8   | 18.3/95.7<br>0.2/39.3 | 30.4/99.2<br>0.1/7.4  | 40.0/98.9<br>0.5/22.6 | 0.9/68.9<br>0.5/12.9  | 1.6/82.2<br>0.2/15.6  | 38.9/98.3<br>1.7/12.9 | 35.7/99.4<br>0.3/24.8 |
| ERDS:3        | 6.5/79.5<br>1.4/38.0  | 8.5/93.1<br>1.4/49.3  | 7.5/95.4<br>0.3/37.9  | 10.0/19.5<br>10.3/3.3 | 3.7/38.0<br>2.8/20.6  | 5.4/99.1<br>0.3/59.0  | 6.7/84.7<br>0.6/38.0  | 5.0/99.1<br>0.2/53.4  | 5.1/99.1<br>0.2/49.2  | 5.3/98.3<br>0.1/52.5  | 5.5/87.7<br>1.4/47.3  | 3.0/73.9<br>0.3/45.2  | 5.3/98.3<br>0.3/45.2  | 3.0/89.4<br>0.1/25.6  | 6.1/85.5<br>1.4/59.1  | 4.8/96.4<br>0.1/66.7  | 5.5/98.4<br>0.1/46.1  | 3.3/91.4<br>0.3/40.1  | 2.3/78.4<br>0.3/48.3  | 5.8/94.8<br>0.5/42.4  | 4.9/99.0<br>0.1/54.1  |
| forestSV:4    | 13.5/69.4<br>1.1/29.9 | 6.7/89.7<br>1.0/38.0  | 15.6/95.5<br>0.3/39.9 | 3.7/38.0<br>2.8/20.6  | 20.2/5.3<br>15.1/9.8  | 20.4/94.7<br>0.3/60.2 | 10.1/67.7<br>0.7/30.5 | 19.3/94.9<br>0.2/51.8 | 19.5/95.3<br>0.2/51.8 | 19.8/95.6<br>0.1/62.5 | 15.7/90.6<br>1.4/39.8 | 10.1/59.9<br>2.4/12.0 | 16.4/95.5<br>0.3/37.5 | 7.2/66.3<br>0.1/22.8  | 10.7/72.4<br>1.0/42.2 | 17.1/94.5<br>0.1/69.0 | 21.0/95.4<br>0.1/51.3 | 8.2/69.5<br>0.3/42.9  | 5.7/57.2<br>0.4/48.4  | 19.2/81.5<br>0.6/39.1 | 18.7/95.8<br>0.1/52.5 |
| GRIDSS:6      | 30.2/97.3<br>0.5/57.2 | 13.8/99.0<br>0/50.0   | 39.4/98.6<br>1.0/18.8 | 5.4/99.1<br>0.3/59.0  | 20.4/94.7<br>0.3/60.2 | 39.4/98.7<br>1.1/17.0 | 13.7/97.4<br>0.1/45.8 | 37.1/98.7<br>0.9/20.8 | 37.6/99.4<br>0.8/21.6 | 36.9/99.1<br>0.3/41.8 | 28.1/99.6<br>0.3/32.7 | 12.8/98.0<br>0.1/70.8 | 30.6/99.5<br>0.4/27.9 | 1.0/82.1<br>0.1/6.0   | 18.0/96.1<br>0.2/66.4 | 30.0/99.4<br>0.1/47.6 | 38.9/98.9<br>0.5/26.5 | 0.7/84.2<br>0.3/13.2  | 1.4/86.8<br>0.1/10.4  | 37.4/99.0<br>0.9/17.6 | 35.7/99.4<br>0.3/27.4 |
| iCopyDAV:3    | 12.5/79.0<br>0.5/30.2 | 14.9/94.5<br>0.5/41.4 | 13.9/97.1<br>0/5.3    | 6.7/84.7<br>0.6/38.0  | 10.1/67.7<br>0.7/30.5 | 13.7/97.4<br>0.1/45.8 | 20.4/56.8<br>2.5/19.2 | 14.3/98.4<br>0/37.5   | 14.4/99.0<br>0/50.0   | 14.4/98.1<br>0/0      | 14.0/94.2<br>0.6/49.5 | 8.4/86.5<br>0.7/29.2  | 14.3/98.1<br>0.1/5.3  | 9.2/91.8<br>0/0       | 13.3/83.0<br>0.6/39.5 | 11.6/98.4<br>0/0      | 14.8/97.0<br>0/0      | 10.0/93.2<br>0.1/15.0 | 7.4/92.6<br>0.1/23.3  | 15.0/94.5<br>0.1/11.0 | 13.7/99.6<br>0/0      |
| Lumpy:7       | 29.5/97.1<br>0.3/54.4 | 13.0/99.3<br>0/50.0   | 37.1/98.7<br>0.9/18.0 | 5.0/99.1<br>0.2/53.4  | 19.3/94.9<br>0.2/51.8 | 37.1/98.7<br>0.9/20.8 | 14.3/98.4<br>0/37.5   | 37.1/98.9<br>0.9/17.4 | 36.7/99.3<br>0.8/22.1 | 35.1/99.2<br>0.3/41.1 | 26.8/99.6<br>0.3/33.8 | 12.0/98.8<br>0.1/66.7 | 29.1/99.5<br>0.4/27.4 | 0.9/86.9<br>0.1/9.3   | 17.3/96.0<br>0.1/80.4 | 29.2/99.3<br>0.1/44.4 | 36.8/99.0<br>0.5/29.2 | 0.4/76.9<br>0.2/13.7  | 0.9/81.4<br>0.1/14.9  | 35.4/98.9<br>0.8/16.9 | 35.3/99.7<br>0.3/26.1 |
| Manta:4       | 29.5/97.6<br>0.3/69.4 | 13.4/99.0<br>0/50.0   | 37.7/99.2<br>0.9/19.1 | 5.1/99.1<br>0.2/49.2  | 19.5/95.3<br>0.2/51.8 | 37.6/99.4<br>0.8/21.6 | 14.4/99.0<br>0/50.0   | 36.7/99.3<br>0.9/19.0 | 37.8/99.4<br>0.3/41.7 | 35.6/99.4<br>0.3/41.7 | 27.2/99.8<br>0.3/33.1 | 12.1/98.8<br>0.1/43.3 | 29.6/99.6<br>0.4/29.9 | 0.7/94.4<br>0.1/7.4   | 17.6/96.7<br>0.1/67.9 | 29.4/99.5<br>0.1/50.0 | 37.5/99.5<br>0.5/29.5 | 0.3/77.7<br>0.2/12.1  | 1.2/93.1<br>0.1/20.6  | 35.9/99.4<br>0.8/18.0 | 35.3/99.8<br>0.3/31.1 |
| Meerkat:8     | 29.3/98.0<br>0.2/78.3 | 13.6/99.0<br>0/25.0   | 37.7/99.1<br>0.4/37.3 | 5.3/98.3<br>0.1/52.5  | 19.8/95.6<br>0.1/62.5 | 36.9/99.1<br>0.3/41.8 | 14.4/98.1<br>0/0      | 35.1/99.2<br>0.3/41.1 | 35.6/99.4<br>0.3/41.7 | 38.3/96.4<br>0.4/37.2 | 27.4/98.5<br>0.2/67.9 | 12.6/98.5<br>0.1/43.8 | 29.5/98.0<br>0.2/59.7 | 1.1/76.4<br>0/19.6    | 17.6/96.2<br>0.1/45.8 | 28.5/99.0<br>0.1/55.5 | 37.8/97.3<br>0.3/47.5 | 0.6/69.2<br>0.1/33.2  | 1.6/87.8<br>0.6/25.5  | 36.4/96.4<br>0.3/35.9 | 34.1/99.6<br>0.3/55.9 |
| MetaSV:6      | 24.6/96.1<br>0.6/63.6 | 14.4/89.8<br>1.6/42.6 | 28.5/99.3<br>0.4/22.8 | 5.5/87.7<br>1.4/47.3  | 15.7/90.6<br>1.4/39.8 | 28.1/99.6<br>0.6/49.5 | 14.0/94.2<br>0.3/32.7 | 26.8/99.6<br>0.3/33.1 | 27.2/99.8<br>0.3/33.1 | 27.4/98.5<br>0.2/67.9 | 30.0/89.9<br>3.3/33.8 | 9.3/95.4<br>0.4/39.6  | 28.0/96.8<br>0.7/25.4 | 0.9/86.9<br>0.1/15.8  | 16.4/94.0<br>0.6/59.4 | 21.4/99.1<br>0.1/33.3 | 28.2/98.1<br>0.2/46.2 | 0.4/84.6<br>0.2/29.3  | 0.3/88.8<br>0.1/38.3  | 28.0/97.7<br>0.4/25.5 | 25.6/99.8<br>0.2/47.6 |
| PennCNV-Seq:3 | 10.0/80.7<br>0.6/25.4 | 6.6/89.6<br>0.3/39.7  | 13.3/97.6<br>0.1/22.2 | 3.0/73.9<br>1.4/16.4  | 10.1/59.9<br>2.4/12.0 | 12.8/98.9<br>0.1/70.8 | 8.4/86.5<br>0.7/29.2  | 12.0/98.8<br>0.1/66.7 | 12.1/98.8<br>0.1/43.3 | 12.6/98.5<br>0.1/43.8 | 9.3/95.4<br>0.4/39.6  | 32.4/60.7<br>9.8/6.6  | 26.9/98.3<br>0.2/37.8 | 24.1/88.4<br>0.2/30.4 | 21.6/84.7<br>1.0/35.7 | 25.7/98.9<br>0.1/6.7  | 32.9/98.6<br>0.1/56.3 | 24.7/88.6<br>0.4/48.3 | 17.6/82.7<br>0.6/50.8 | 30.7/89.3<br>0.7/39.4 | 29.1/99.0<br>0.1/72.9 |
| Pindel:5      | 26.2/97.6<br>0.3/50.3 | 13.5/99.0<br>0/25.0   | 30.9/99.2<br>0.6/14.8 | 5.3/98.3<br>0.3/45.2  | 16.4/95.5<br>0.3/37.5 | 30.6/99.5<br>0.4/27.9 | 14.3/98.1<br>0.1/5.3  | 29.1/99.5<br>0.4/27.4 | 29.6/99.6<br>0.4/29.9 | 29.5/98.0<br>0.2/59.7 | 28.0/96.8<br>0.7/25.4 | 26.9/98.3<br>1.2/13.6 | 31.3/95.8<br>0.1/5.9  | 0.8/86.3<br>0.1/5.9   | 17.7/97.2<br>0.1/33.3 | 23.5/99.2<br>0.3/38.1 | 31.1/97.8<br>0.3/38.1 | 0.4/76.9<br>0.3/11.3  | 0.5/80.0<br>0.1/22.8  | 30.8/97.8<br>0.6/11.3 | 28.3/99.8<br>0.2/41.3 |
| RAPTR:5       | 2.1/72.3<br>0/4.2     | 7.2/98.1<br>0/0       | 1.3/80.5<br>0.2/7.8   | 3.0/89.4<br>0.1/25.6  | 7.2/66.3<br>0.1/22.8  | 1.0/82.1<br>0.1/6.0   | 9.2/91.8<br>0/19.3    | 0.9/86.9<br>0.1/9.3   | 0.7/94.4<br>0.1/7.4   | 1.1/76.4<br>0/19.6    | 0.9/86.9<br>0.1/15.8  | 24.1/88.4<br>0.2/30.4 | 0.8/86.3<br>0.1/5.9   | 31.8/84.0<br>1.1/8.9  | 20.5/98.0<br>0.1/49.0 | 26.8/98.9<br>0.1/15.8 | 34.6/97.5<br>0.1/15.8 | 30.8/86.7<br>0.2/9.9  | 26.7/86.4<br>0.3/17.0 | 31.7/84.8<br>0.6/9.2  | 30.7/99.7<br>0.1/10.2 |
| readDepth:6   | 17.2/81.0<br>1.0/43.2 | 14.5/91.7<br>0.7/67.0 | 18.3/95.7<br>0.2/39.3 | 6.1/85.5<br>1.4/59.1  | 10.7/72.4<br>1.0/42.2 | 18.0/96.1<br>0.2/66.4 | 13.3/83.0<br>0.6/39.5 | 17.3/96.0<br>0.1/80.4 | 17.6/96.2<br>0.1/67.9 | 17.6/96.2<br>0.1/45.8 | 16.4/94.0<br>0.6/59.4 | 21.6/84.7<br>1.0/35.7 | 17.7/97.2<br>0.1/33.3 | 20.5/98.0<br>0.1/49.0 | 23.2/52.1<br>2.9/28.0 | 9.9/60<br>0.2/2.2     | 12.3/95.7<br>0.1/93.8 | 7.4/91.6<br>0.1/41.7  | 5.7/84.1<br>0.2/62.2  | 12.3/93.4<br>0.2/41.4 | 11.3/96.8<br>0.1/75.0 |
| Sniffles:3    | 24.4/96.9<br>0.1/13.9 | 10.6/97.9<br>0/33.3   | 30.4/99.2<br>0.1/7.4  | 4.8/96.4<br>0.1/66.7  | 17.1/94.5<br>0.1/69.0 | 30.0/99.4<br>0.1/47.6 | 11.6/98.4<br>0/0      | 29.2/99.3<br>0.1/44.4 | 29.4/99.5<br>0.1/50.0 | 28.5/99.0<br>0.1/55.5 | 21.4/99.1<br>0.1/33.3 | 25.7/98.9<br>0/16.7   | 23.5/99.2<br>0.1/5.1  | 26.8/98.9<br>0.1/6.6  | 9.9/60<br>0.2/2.2     | 31.2/93.3<br>0.3/18.3 | 30.4/99.2<br>0.1/24.4 | 0.9/76.9<br>0.6/7     | 1.1/86.2<br>0/0       | 29.4/98.9<br>0.1/6.0  | 28.2/99.6<br>0.8/3    |
| SoftSV:3      | 30.4/97.8<br>0.2/49.7 | 14.1/98.7<br>0/25.0   | 40.0/98.9<br>0.5/22.6 | 5.5/98.4<br>0.1/46.1  | 21.0/95.4<br>0.1/51.3 | 38.9/98.9<br>0.5/26.5 | 14.8/97.0<br>0/0      | 36.8/99.0<br>0.5/29.2 | 37.5/99.5<br>0.5/29.5 | 37.8/97.3<br>0.3/47.5 | 28.2/98.1<br>0.2/46.2 | 32.9/98.6<br>0.1/56.3 | 31.1/97.8<br>0.3/38.1 | 34.6/97.5<br>0.1/15.8 | 12.3/95.7<br>0.1/93.8 | 30.4/99.2<br>0.1/24.4 | 40.9/96.1<br>0.6/18.9 | 0.9/70.9<br>0.2/13.1  | 1.7/82.6<br>0/13.5    | 38.7/96.5<br>0.5/21.0 | 35.4/99.4<br>0.3/35.6 |
| SVDetect:6    | 2.2/71.0<br>0.2/31.9  | 8.0/98.3<br>0.1/75.0  | 0.9/68.9<br>0.5/12.9  | 3.3/91.4<br>0.3/40.1  | 8.2/69.5<br>0.3/42.9  | 0.7/84.2<br>0.3/13.2  | 10.0/93.2<br>0.1/15.0 | 0.4/76.9<br>0.2/13.7  | 0.3/77.7<br>0.2/12.1  | 0.8/69.2<br>0.1/33.2  | 0.4/84.6<br>0.2/29.3  | 24.7/88.6<br>0.4/48.3 | 0.4/76.9<br>0.3/11.3  | 30.8/86.7<br>0.2/9.9  | 7.4/91.6<br>0.1/41.7  | 0.9/76.9<br>0.6/7     | 0.9/70.9<br>0.2/13.1  | 34.5/83.4<br>1.0/12.6 | 27.8/87.4<br>0.5/32.9 | 34.4/85.3<br>0.9/14.2 | 32.5/99.6<br>0.1/21.1 |
| TIDDIT:3      | 1.7/61.9<br>0.1/41.7  | 4.8/98.1<br>0.1/75.0  | 1.6/82.2<br>0.2/15.6  | 2.3/78.4<br>0.3/48.3  | 5.7/57.2<br>0.4/48.4  | 1.4/86.8<br>0.1/10.4  | 7.4/92.6<br>0.1/23.3  | 0.9/81.4<br>0.1/14.9  | 1.2/93.1<br>0.1/20.6  | 1.6/87.8<br>0.6/25.5  | 0.3/88.8<br>0.1/38.3  | 17.6/82.7<br>0.6/50.8 | 0.5/80.0<br>0.1/22.8  | 26.7/86.4<br>0.3/17.0 | 5.7/84.1<br>0.2/62.2  | 1.1/86.2<br>0/0       | 1.7/82.6<br>0/13.5    | 27.8/87.4<br>0.5/32.9 | 28.8/78.4<br>1.0/14.6 | 29.9/87.0<br>0.8/26.9 | 30.2/99.8<br>0.2/39.9 |
| Ulysses:3     | 30.0/94.9<br>0.6/31.9 | 14.2/98.1<br>0.1/87.5 | 38.9/98.3<br>1.7/12.9 | 5.8/94.8<br>0.5/42.4  | 19.2/81.5<br>0.7/39.9 | 37.4/99.0<br>0.9/17.6 | 15.0/94.5<br>0.1/11.0 | 35.4/98.9<br>0.8/16.9 | 35.9/99.4<br>0.8/18.0 | 36.4/96.4<br>0.3/35.9 | 28.0/97.7<br>0.4/25.5 | 30.7/89.3<br>0.7/39.4 | 30.8/97.8<br>0.6/11.3 | 31.7/84.8<br>0.6/9.2  | 12.3/93.4<br>0.2/41.4 | 29.4/98.9<br>0.1/6.0  | 38.7/96.5<br>0.5/21.0 | 34.4/85.3<br>0.9/14.2 | 29.9/87.0<br>0.8/26.9 | 35.7/82.9<br>2.3/8.9  | 33.9/99.6<br>0.2/21.6 |
| Wham:6        | 28.6/97.6<br>0.2/62.0 | 12.5/99.2<br>0/25.0   | 35.7/99.4<br>0.3/24.8 | 4.9/99.0<br>0.1/54.1  | 18.7/95.8<br>0.1/52.5 | 35.7/99.4<br>0.3/27.4 | 13.7/99.6<br>0/0      | 35.3/99.7<br>0.3/26.1 | 35.3/99.8<br>0.3/31.1 | 34.1/99.6<br>0.3/55.9 | 25.6/99.8<br>0.2/47.6 | 29.1/98.0<br>0.1/72.9 | 28.3/99.8<br>0.2/41.3 | 30.7/99.7<br>0.1/10.2 | 11.3/96.8<br>0.1/75.0 | 28.2/99.6<br>0.8/3    | 35.4/99.4<br>0.3/35.6 | 32.5/99.4<br>0.1/21.1 | 30.2/99.8<br>0.2/39.9 | 33.9/99.6<br>0.2/21.4 | 35.7/99.4<br>0.3/22.9 |

**Figure S20. Recall and precision of SVs commonly called between a pair of SV detection algorithms for the DUP-M category.** DUPs in the middle size-range (1 Kb–100 Kb), called using the indicated algorithms, were filtered with the minimum number of reads supporting the called SVs, indicated with the suffix number of the algorithm name. The DUPs overlapping between the filtered SV sets from a pair of the indicated algorithms were selected, and the recall and precision of the selected DUPs were determined. Recall and precision percentages are presented as in Figure S15. The data contained in the top 20th percentile of the combined precision scores for the simulated and real data are highlighted with a red background, and the next data contained in the top 21st–50th percentile of the combined precision scores are shown with a pale red background.

| Algorithm     | AS-GENSENG:3          | BICseq2:8              | CNVnator:4            | DELLY:3                | ERDS:3                 | forestSV6              | GRIDSS:6              | iCopyDAV:3            | inGAP-sv:3            | Lumpy:4               | Manta:4               | Meerkat:8             | MetaSV:7               | OncoSNP-SEQ:4         | PennCNV-Seq:3         | Pindel:4               | RAPTR:3               | readDepth:6           | Sniffles:2             | SoftSV:6               | SVDetect:3            | TIDDI:3               | Ulysses:3             |                       |
|---------------|-----------------------|------------------------|-----------------------|------------------------|------------------------|------------------------|-----------------------|-----------------------|-----------------------|-----------------------|-----------------------|-----------------------|------------------------|-----------------------|-----------------------|------------------------|-----------------------|-----------------------|------------------------|------------------------|-----------------------|-----------------------|-----------------------|-----------------------|
| AS-GENSENG:3  | 13.1/43.2<br>5.1/19.1 | 11.2/88.9<br>1.1/75.0  | 10.6/88.4<br>1.4/58.5 | 12.0/89.6<br>0.1/12.5  | 8.5/86.8<br>1.0/74.4   | 5.3/93.1<br>0.4/37.5   | 12.0/89.6<br>0/0      | 6.0/83.5<br>0.8/60.4  | 5.5/94.9<br>0.1/25.0  | 11.8/90.1<br>0/0      | 11.8/90.1<br>0/0      | 11.5/89.9<br>0.3/50.0 | 10.5/88.3<br>1.8/63.1  | 1.8/65.5<br>0.1/12.5  | 5.2/89.8<br>0/0       | 11.4/89.8<br>0.8/75.0  | 6.3/87.6<br>0.6/64.6  | 8.5/82.6<br>0.9/55.5  | 11.4/82.1<br>0.5/55.5  | 11.9/89.5<br>0.3/37.5  | 6.6/87.0<br>0.6/51.7  | 4.1/87.5<br>0.5/56.3  | 12.1/89.0<br>0.8/53.5 |                       |
| BICseq2:8     | 11.2/88.9<br>1.1/75.0 | 36.8/84.9<br>4.4/48.7  | 25.1/92.7<br>2.7/73.0 | 35.9/97.0<br>0.1/25.0  | 23.1/94.3<br>1.9/68.3  | 13.1/96.3<br>1.4/65.8  | 35.7/97.0<br>0/0      | 13.7/86.9<br>1.5/76.3 | 14.1/95.3<br>0.5/62.5 | 34.9/97.5<br>0/0      | 35.1/97.5<br>0/0      | 34.5/96.9<br>0.4/75.0 | 30.2/95.9<br>2.3/100.0 | 5.0/80.9<br>0/0       | 11.1/87.5<br>0.3/25.0 | 33.9/96.8<br>0.6/100.0 | 4.7/77.4<br>0.1/25.0  | 22.9/88.5<br>0.9/39.6 | 32.6/97.0<br>0.5/100.0 | 35.6/97.0<br>0.5/100.0 | 5.2/79.1<br>0.3/25.0  | 3.3/69.3<br>0.1/25.0  | 36.0/95.0<br>0.8/91.7 |                       |
| CNVnator:4    | 10.6/88.4<br>1.4/58.5 | 25.1/92.7<br>2.7/73.0  | 41.7/91.1<br>8.2/49.3 | 26.5/98.5<br>0.1/8.3   | 31.5/94.6<br>5.0/59.5  | 9.6/97.0<br>1.8/75.0   | 26.0/98.5<br>0/0      | 20.9/93.7<br>1.6/70.8 | 10.4/98.1<br>0.1/25.0 | 25.5/98.8<br>0/0      | 25.3/98.8<br>0/0      | 25.7/98.8<br>0/0      | 25.2/94.4<br>6.1/59.2  | 5.3/90.0<br>0/0       | 12.5/95.4<br>0.1/25.0 | 24.8/98.4<br>0.1/25.0  | 14.8/96.1<br>0.1/12.5 | 25.6/94.1<br>1.3/49.6 | 24.7/98.0<br>0/0       | 26.7/98.5<br>0/0       | 16.4/96.5<br>0.1/12.5 | 10.4/93.7<br>0.1/8.3  | 27.2/97.5<br>0.1/8.3  |                       |
| DELLY:3       | 12.0/89.6<br>0.1/12.5 | 35.9/97.0<br>0.1/25.0  | 26.5/98.5<br>0.1/8.3  | 44.9/98.0<br>2.4/7.0   | 26.3/96.0<br>0.6/100.0 | 14.2/97.9<br>0.6/100.0 | 43.8/98.6<br>0.8/7.0  | 15.5/90.2<br>0.6/91.7 | 15.4/97.5<br>0.1/25.0 | 42.2/99.0<br>1.0/6.1  | 42.3/99.0<br>0.4/3.9  | 42.2/99.7<br>0/0      | 36.5/99.4<br>0.9/23.4  | 5.5/82.3<br>0/0       | 13.2/97.8<br>0.2/5.0  | 41.8/99.5<br>1.3/10.9  | 1.2/65.0<br>1.1/6.8   | 25.4/96.2<br>0/0      | 39.7/99.5<br>0/0       | 44.5/99.5<br>0.1/12.5  | 1.5/66.6<br>1.3/8.4   | 0.9/58.8<br>0.6/12.1  | 44.8/98.0<br>2.4/7.1  |                       |
| ERDS:3        | 8.5/86.8<br>1.0/74.4  | 23.1/94.3<br>1.9/68.3  | 31.5/94.6<br>5.0/59.5 | 26.3/96.0<br>0.6/100.0 | 35.1/87.9<br>9.2/97.8  | 9.2/97.8<br>1.6/67.9   | 21.8/97.7<br>0/0      | 18.3/93.4<br>1.8/68.7 | 9.2/98.9<br>0.1/25.0  | 21.2/97.7<br>0/0      | 21.1/97.7<br>0/0      | 21.6/97.7<br>0/0      | 21.0/93.8<br>4.2/79.1  | 5.6/86.5<br>0/0       | 10.7/94.7<br>0/0      | 21.5/97.7<br>0.5/87.5  | 13.1/97.0<br>0.8/87.5 | 22.5/94.5<br>0.8/42.5 | 20.3/96.2<br>0/0       | 22.4/97.8<br>0/0       | 13.9/97.2<br>0.5/62.5 | 9.4/95.0<br>0.5/75.0  | 23.0/97.8<br>0.6/75.0 |                       |
| forestSV:6    | 5.3/93.1<br>0.4/37.5  | 13.1/96.3<br>1.4/65.8  | 9.6/97.0<br>1.8/75.0  | 14.2/97.9<br>0.6/100.0 | 9.2/97.8<br>1.6/67.9   | 17.4/92.1<br>3.8/62.4  | 16.1/98.1<br>0/0      | 12.0/95.2<br>0.4/29.2 | 14.8/96.1<br>0.4/75.0 | 15.8/98.1<br>0/0      | 16.0/98.1<br>0/0      | 15.5/98.1<br>0/0      | 14.5/98.0<br>1.6/76.2  | 0.8/100.0<br>0/0      | 7.2/97.3<br>0.3/50.0  | 15.9/98.1<br>0/0       | 4.2/93.4<br>0.1/25.0  | 10.5/94.6<br>0.8/66.7 | 15.7/96.9<br>0/0       | 16.5/98.2<br>0/0       | 5.2/94.6<br>0/0       | 3.0/88.5<br>0/0       | 16.6/98.2<br>0.1/25.0 |                       |
| GRIDSS:6      | 12.0/89.6<br>0/0      | 35.7/97.0<br>0/0       | 26.0/98.5<br>0.8/7.0  | 43.8/98.6<br>0.8/7.0   | 21.8/97.7<br>0/0       | 16.1/98.1<br>0.8/6.8   | 43.9/98.2<br>0.8/6.8  | 15.5/90.2<br>0/0      | 15.4/97.5<br>0/0      | 42.3/99.0<br>0.6/7.8  | 42.4/99.0<br>0.4/7.0  | 41.3/99.7<br>0/0      | 35.7/99.4<br>0.3/11.3  | 5.4/82.0<br>0/0       | 12.9/97.7<br>0/0      | 41.0/99.5<br>0.5/9.3   | 1.0/73.3<br>0/0       | 25.1/96.2<br>0/0      | 39.6/99.7<br>0/0       | 43.6/99.5<br>0/0       | 1.4/78.9<br>0/0       | 0.9/66.6<br>0/0       | 43.8/98.8<br>0.6/6.2  |                       |
| iCopyDAV:3    | 6.0/83.5<br>0.8/60.4  | 13.7/86.8<br>1.5/76.3  | 20.9/93.7<br>1.6/70.8 | 15.5/90.2<br>0.6/91.7  | 18.3/93.4<br>1.8/68.7  | 12.0/95.2<br>0.4/29.2  | 15.5/90.2<br>0/0      | 34.6/85.9<br>3.8/67.1 | 11.1/95.7<br>0.3/25.0 | 30.3/97.4<br>0/0      | 30.1/97.4<br>0/0      | 29.7/96.7<br>0/0      | 28.0/96.2<br>2.4/87.3  | 10.2/92.7<br>0/0      | 19.9/89.7<br>0.3/25.0 | 29.0/96.6<br>0.1/25.0  | 23.2/96.6<br>0.5/45.8 | 24.9/92.2<br>0.5/45.8 | 28.3/96.6<br>0/0       | 31.0/97.2<br>0/0       | 25.0/96.5<br>0/0      | 19.9/95.7<br>0.1/25.0 | 31.3/96.9<br>0.1/25.0 |                       |
| inGAP-sv:3    | 5.5/94.9<br>0.1/25.0  | 14.1/95.3<br>0.5/62.5  | 10.4/98.1<br>0.1/25.0 | 15.4/97.5<br>0.1/25.0  | 19.2/98.9<br>0.4/75.0  | 9.2/98.9<br>0/0        | 14.8/96.1<br>0/0      | 15.4/97.5<br>0.3/25.0 | 11.1/95.7<br>1.9/66.4 | 16.3/90.7<br>0/0      | 15.5/96.9<br>0/0      | 15.6/96.9<br>0/0      | 15.3/96.8<br>0/0       | 14.3/97.3<br>0.5/66.7 | 0.2/100.0<br>0/0      | 5.7/92.0<br>0.1/25.0   | 15.5/96.9<br>0/0      | 4.0/89.1<br>0.1/12.5  | 9.6/92.3<br>0/0        | 15.4/96.2<br>0.1/25.0  | 16.2/97.0<br>0.1/25.0 | 4.5/90.1<br>0/0       | 1.2/72.2<br>0/0       | 16.1/97.0<br>0.1/12.5 |
| Lumpy:4       | 11.8/90.1<br>0/0      | 34.9/97.5<br>0/0       | 25.5/98.8<br>0/0      | 42.2/99.0<br>1.0/6.1   | 21.2/97.7<br>0/0       | 15.8/98.1<br>0/0       | 42.3/99.0<br>0.6/7.8  | 30.3/97.4<br>0/0      | 15.5/96.9<br>0/0      | 42.4/98.8<br>0/0      | 42.0/98.8<br>0.4/4.5  | 40.1/99.7<br>0/0      | 34.5/99.4<br>0.6/23.8  | 5.1/81.2<br>0/0       | 12.5/98.4<br>0/0      | 39.6/99.5<br>0.8/11.9  | 1.4/83.3<br>0.4/4.5   | 24.3/96.4<br>0/0      | 38.7/99.7<br>0/0       | 42.1/99.5<br>0/0       | 1.4/78.9<br>0.9/12.5  | 0.8/60.0<br>0.1/3.1   | 42.4/98.8<br>1.0/6.1  |                       |
| Manta:4       | 11.8/90.1<br>0/0      | 35.1/97.5<br>0/0       | 25.3/98.8<br>0/0      | 42.3/99.0<br>0.4/3.9   | 21.1/97.7<br>0/0       | 16.0/98.1<br>0/0       | 42.4/99.0<br>0.4/7.0  | 30.1/97.4<br>0/0      | 15.6/96.9<br>0/0      | 42.0/98.8<br>0.4/4.5  | 42.4/98.8<br>0.5/5.3  | 40.2/99.7<br>0/0      | 34.8/99.4<br>0.3/14.6  | 5.1/81.2<br>0/0       | 12.5/98.4<br>0/0      | 39.8/99.5<br>0.3/8.8   | 0.8/75.0<br>0/0       | 23.9/96.4<br>0/0      | 38.5/99.7<br>0/0       | 42.2/99.5<br>0/0       | 1.1/75.0<br>0.3/6.9   | 0.6/58.3<br>0/0       | 42.3/99.0<br>0.4/4.0  |                       |
| Meerkat:8     | 11.5/89.9<br>0.3/50.0 | 34.5/96.9<br>0.4/75.0  | 25.7/98.8<br>0/0      | 42.2/99.7<br>0/0       | 21.6/97.7<br>0/0       | 15.5/98.1<br>0/0       | 41.3/99.7<br>0/0      | 29.7/96.7<br>0/0      | 15.3/96.8<br>0/0      | 40.1/99.7<br>0/0      | 40.2/99.7<br>0/0      | 43.3/98.8<br>0.5/41.7 | 35.2/98.6<br>0.4/62.5  | 5.2/81.5<br>0/0       | 12.5/97.6<br>0/0      | 40.0/98.7<br>0.4/58.3  | 1.2/72.2<br>0.1/12.5  | 24.4/96.0<br>0/0      | 38.2/98.7<br>0.5/66.7  | 42.8/99.0<br>0.4/62.5  | 1.3/70.0<br>0.1/8.3   | 0.9/71.4<br>0/0       | 43.1/99.0<br>0.4/31.3 |                       |
| MetaSV:7      | 10.5/88.3<br>1.8/63.1 | 30.2/95.9<br>2.3/100.0 | 25.2/94.4<br>6.1/59.2 | 36.5/99.4<br>0.9/23.4  | 21.0/93.8<br>4.2/79.1  | 14.5/98.0<br>1.6/76.2  | 35.7/99.4<br>0.3/11.3 | 28.0/96.2<br>2.4/87.3 | 14.3/97.3<br>0.5/66.7 | 34.5/99.4<br>0.6/23.8 | 34.8/99.4<br>0.3/14.6 | 35.2/98.6<br>0.4/62.5 | 38.9/94.2<br>7.2/39.5  | 5.3/91.5<br>0/0       | 11.2/99.1<br>0.1/25.0 | 34.9/98.5<br>1.0/18.2  | 2.7/87.5<br>0.5/16.1  | 21.5/94.3<br>1.1/58.3 | 33.4/97.9<br>0.2/33.3  | 37.0/99.2<br>0.3/33.3  | 3.0/88.5<br>0.5/19.6  | 1.6/80.9<br>0/0       | 37.3/98.6<br>0.9/20.6 |                       |
| OncoSNP-SEQ:4 | 1.8/65.5<br>0.1/12.5  | 5.0/80.9<br>0/0        | 5.3/90.0<br>0/0       | 5.5/82.3<br>0/0        | 5.6/86.5<br>0/0        | 0.8/100.0<br>0/0       | 5.4/82.0<br>0/0       | 10.2/92.7<br>0/0      | 0.2/100.0<br>0/0      | 5.1/81.2<br>0/0       | 5.1/81.2<br>0/0       | 5.2/81.5<br>0/0       | 5.3/91.5<br>0/0        | 22.8/67.2<br>2.5/19.2 | 17.4/92.6<br>0/0      | 20.6/98.1<br>0/0       | 20.9/97.6<br>0/0      | 18.7/94.5<br>0/0      | 19.7/97.0<br>0/0       | 21.9/98.6<br>0/0       | 21.7/97.7<br>0/0      | 20.8/97.6<br>0/0      | 22.4/98.2<br>0/0      |                       |
| PennCNV-Seq:3 | 5.2/89.8<br>0/0       | 11.1/87.5<br>0.3/25.0  | 12.5/95.4<br>0.1/25.0 | 13.2/97.8<br>0.2/5.0   | 10.7/94.7<br>0/0       | 7.2/97.3<br>0.3/50.0   | 12.9/97.7<br>0/0      | 19.9/89.7<br>0.3/25.0 | 5.7/92.0<br>0.5/50.0  | 12.5/98.4<br>0/0      | 12.5/98.4<br>0/0      | 12.5/97.6<br>0/0      | 11.2/99.1<br>0.1/25.0  | 17.4/92.6<br>2.0/58.4 | 37.3/85.4<br>3.0/58.4 | 36.0/98.1<br>0/0       | 32.0/95.2<br>0/0      | 29.2/88.5<br>0.3/25.0 | 34.7/98.3<br>0/0       | 37.7/98.4<br>0/0       | 33.2/95.4<br>0/0      | 25.2/95.5<br>0/0      | 38.0/96.9<br>0/0      |                       |
| Pindel:4      | 11.4/89.8<br>0.8/75.0 | 33.9/96.8<br>0.6/100.0 | 24.8/98.4<br>0.1/25.0 | 41.8/99.5<br>1.3/10.9  | 21.5/97.7<br>0.5/87.5  | 15.9/98.1<br>0/0       | 41.0/99.5<br>0.5/9.3  | 29.0/96.6<br>0/0      | 15.5/96.9<br>0.1/25.0 | 39.6/99.5<br>0.8/11.9 | 39.8/99.5<br>0.3/6.8  | 40.0/98.4<br>0.4/58.3 | 34.9/98.5<br>1.0/18.2  | 20.6/98.1<br>0/0      | 36.0/98.1<br>0/0      | 42.8/98.4<br>3.4/15.3  | 1.1/70.5<br>1.1/19.7  | 23.6/95.9<br>0.1/12.5 | 38.1/98.4<br>1.2/68.2  | 42.5/99.0<br>0.5/45.2  | 1.6/77.2<br>1.6/23.4  | 1.0/73.3<br>1.0/30.8  | 42.7/98.8<br>3.2/21.0 |                       |
| RAPTR:3       | 6.3/87.6<br>0.6/64.6  | 4.7/77.4<br>0.1/25.0   | 14.8/96.1<br>0.1/12.5 | 1.2/65.0<br>1.1/6.8    | 13.1/97.0<br>0.6/87.5  | 4.2/93.4<br>0.1/25.0   | 1.0/73.3<br>0/0       | 23.2/96.6<br>0.1/25.0 | 4.0/89.1<br>0/0       | 1.4/83.3<br>0.4/4.5   | 0.8/75.0<br>0/0       | 1.2/72.2<br>0.1/12.5  | 2.7/87.5<br>0.5/16.1   | 20.9/97.6<br>0/0      | 32.0/95.2<br>0/0      | 1.1/70.5<br>1.1/19.7   | 42.9/95.1<br>3.2/9.1  | 28.5/95.6<br>0.1/8.3  | 37.0/97.6<br>0.8/38.3  | 41.8/99.0<br>0.5/28.8  | 42.9/95.1<br>2.6/16.0 | 39.4/98.5<br>1.1/24.0 | 42.7/95.5<br>3.0/10.0 |                       |
| readDepth:6   | 8.5/82.6<br>0.9/55.5  | 22.9/88.5<br>0.9/39.6  | 25.6/94.1<br>1.3/49.6 | 25.4/96.2<br>0/0       | 22.5/94.5<br>0.8/42.5  | 10.5/94.6<br>0.8/66.7  | 25.1/96.2<br>0/0      | 24.9/92.2<br>0.5/45.8 | 9.6/92.3<br>0.1/12.5  | 24.3/96.4<br>0/0      | 23.9/96.4<br>0/0      | 24.4/96.0<br>0/0      | 21.5/94.3<br>1.1/58.3  | 18.7/94.5<br>0/0      | 29.2/88.5<br>0.3/25.0 | 23.6/95.9<br>0.1/12.5  | 28.5/95.6<br>0.1/8.3  | 33.9/77.4<br>4.5/29.3 | 19.1/92.7<br>0.1/6.3   | 21.4/94.3<br>0/0       | 16.2/91.6<br>0.3/25.0 | 12.6/85.9<br>0.3/37.5 | 21.6/91.9<br>0.4/33.3 |                       |
| Sniffles:2    | 11.4/82.1<br>0.5/55.5 | 32.6/97.0<br>0.5/100.0 | 24.7/98.0<br>0.3/3.3  | 39.7/99.5<br>0/0       | 20.3/96.2<br>0.3/3.3   | 15.7/96.9<br>0.3/3.3   | 39.6/99.7<br>0/0      | 28.3/96.6<br>0/0      | 15.4/96.2<br>0/0      | 38.7/99.7<br>0/0      | 38.5/99.7<br>0/0      | 38.2/98.7<br>0.5/66.7 | 33.4/97.9<br>0.2/33.3  | 19.7/97.0<br>0/0      | 34.7/98.3<br>0/0      | 38.1/98.4<br>1.2/68.2  | 37.0/97.6<br>0.8/38.3 | 19.1/92.7<br>0/0      | 41.5/80.7<br>0.8/100.0 | 40.5/98.5<br>0.8/100.0 | 4.0/78.8<br>0.8/57.8  | 2.1/73.3<br>0.2/11.1  | 40.9/97.8<br>1.5/42.9 |                       |
| SoftSV:6      | 11.9/89.5<br>0.3/37.5 | 35.6/97.0<br>0.5/100.0 | 26.7/98.5<br>0/0      | 44.5/99.5<br>0.1/12.5  | 22.4/97.8<br>0/0       | 16.5/98.2<br>0/0       | 43.6/99.5<br>0/0      | 31.0/97.2<br>0/0      | 16.2/97.0<br>0.1/25.0 | 42.1/99.5<br>0/0      | 42.2/99.5<br>0/0      | 42.8/99.0<br>0.4/62.5 | 37.0/99.2<br>0.3/33.3  | 21.9/98.6<br>0/0      | 37.7/98.4<br>0/0      | 42.5/99.0<br>0.5/45.2  | 41.8/99.0<br>0.5/28.8 | 21.4/94.3<br>0/0      | 40.5/98.5<br>0.8/100.0 | 46.0/98.7<br>0.5/20.6  | 1.6/73.9<br>0.1/6.3   | 0.9/71.4<br>0/0       | 45.7/98.9<br>0.5/21.9 |                       |
| SVDetect:3    | 6.6/87.0<br>0.6/51.7  | 5.2/79.1<br>0.3/25.0   | 16.4/96.5<br>0.1/12.5 | 1.5/66.6<br>1.3/8.4    | 13.9/97.2<br>0.5/62.5  | 5.2/94.6<br>0/0        | 1.4/78.9<br>0/0       | 25.0/96.5<br>0/0      | 4.5/90.1<br>0.9/12.5  | 1.4/78.9<br>0.3/6.9   | 1.1/75.0<br>0/0       | 1.3/70.0<br>0.1/8.3   | 1.3/70.0<br>0.5/19.6   | 21.7/97.7<br>0/0      | 33.2/95.4<br>0/0      | 1.6/77.2<br>1.6/23.4   | 42.9/95.1<br>2.6/16.0 | 16.2/91.6<br>0.3/25.0 | 4.0/78.8<br>0.8/57.8   | 1.6/73.9<br>0.1/6.3    | 47.1/89.2<br>3.7/10.5 | 41.7/97.4<br>1.3/27.5 | 46.9/92.3<br>3.1/11.1 |                       |
| TIDDI:3       | 4.1/87.5<br>0.5/56.3  | 3.3/69.3<br>0.1/25.0   | 10.4/93.7<br>0.1/8.3  | 0.9/58.8<br>0.6/12.1   | 9.4/95.0<br>0.5/75.0   | 3.0/88.5<br>0/0        | 0.9/66.6<br>0/0       | 19.9/95.7<br>0/0      | 1.2/72.2<br>0/0       | 0.8/60.0<br>0.1/3.1   | 0.6/58.3<br>0/0       | 0.9/71.4<br>0/0       | 1.6/80.9<br>0/0        | 20.8/97.6<br>0/0      | 25.2/95.5<br>0/0      | 1.0/73.3<br>1.0/30.8   | 39.4/98.5<br>1.1/24.0 | 12.6/85.9<br>0.3/37.5 | 2.1/73.3<br>0.2/11.1   | 0.9/71.4<br>0/0        | 41.7/97.4<br>1.3/27.5 | 43.4/95.4<br>1.5/17.0 | 43.5/97.5<br>1.5/21.1 |                       |
| Ulysses:3     | 12.1/89.0<br>0.8/53.5 | 36.0/95.0<br>0.8/91.7  | 27.2/97.5<br>0.1/8.3  | 44.8/98.0<br>2.4/7.1   | 23.0/97.8<br>0.6/75.0  | 16.6/98.2<br>0.1/25.0  | 43.8/9                |                       |                       |                       |                       |                       |                        |                       |                       |                        |                       |                       |                        |                        |                       |                       |                       |                       |

| Algorithm         | 1-2-3-SV:12          | BreakDancer:5        | DELLY:8              | GASVPro:8            | GRIDSS:7             | inGAP-sv:8           | Lumpy:9              | Manta:3              | Meerkat:7            | MetaSV:3             | Pindel:9             | PRISM:3              | Sniffles:3           | SoftSV:7             | SvABA:3              | SVELter:3            | TIDDIT:8             | Ulysses:3            | VariationHunter:4    | Wham:5               |
|-------------------|----------------------|----------------------|----------------------|----------------------|----------------------|----------------------|----------------------|----------------------|----------------------|----------------------|----------------------|----------------------|----------------------|----------------------|----------------------|----------------------|----------------------|----------------------|----------------------|----------------------|
| 1-2-3-SV:12       | 6.4/70.2<br>1.3/33.7 | 0.7/73.6<br>0.2/38.7 | 5.4/94.6<br>0.8/41.6 | 2.3/85.8<br>0.4/48.2 | 5.4/94.6<br>0.7/44.6 | 4.8/95.5<br>0.5/54.5 | 4.9/97.7<br>0.3/75.3 | 5.3/96.0<br>0.7/44.1 | 5.1/95.8<br>0.2/61.3 | 4.3/99.3<br>0.3/61.6 | 5.2/97.4<br>0.5/46.8 | 5.5/97.0<br>0.5/46.6 | 5.1/94.8<br>0.2/75.0 | 5.3/96.9<br>0.2/75.9 | 4.8/96.1<br>0.4/41.9 | 3.6/96.9<br>0.1/76.9 | 5.5/92.5<br>0.9/44.3 | 1.6/82.1<br>0.1/24.0 | 2.1/93.9<br>0.3/44.4 | 4.8/96.0<br>0.5/51.5 |
| BreakDancer:5     | 0.7/73.6<br>0.2/38.7 | 4.4/72.8<br>0.8/19.2 | 5.0/97.8<br>0.8/38.7 | 1.8/90.2<br>0.4/40.9 | 5.0/98.3<br>0.7/36.9 | 4.5/98.7<br>0.4/47.1 | 4.8/98.2<br>0.2/57.0 | 4.9/97.8<br>0.7/37.4 | 4.6/98.8<br>0.2/48.8 | 4.2/98.0<br>0.4/44.2 | 4.8/98.8<br>0.4/40.3 | 5.0/98.9<br>0.4/56.8 | 4.7/98.8<br>0.2/84.3 | 4.8/98.8<br>0.2/50.0 | 4.6/98.2<br>0.4/49.2 | 3.5/98.4<br>0.1/56.7 | 4.7/94.9<br>0.8/41.8 | 1.9/85.3<br>0.1/19.7 | 1.8/88.3<br>0.2/55.8 | 4.6/97.6<br>0.5/38.5 |
| DELLY:8           | 5.4/94.6<br>0.8/41.6 | 5.0/97.8<br>0.8/38.7 | 6.8/95.7<br>1.7/30.9 | 2.7/93.3<br>0.7/34.8 | 6.7/97.5<br>1.5/36.5 | 5.5/98.5<br>0.9/43.5 | 5.9/99.0<br>0.7/52.7 | 6.5/97.5<br>1.5/34.9 | 6.3/97.8<br>0.5/45.9 | 4.7/98.8<br>0.5/47.2 | 6.3/99.1<br>1.0/43.6 | 6.3/99.5<br>0.7/47.0 | 5.8/99.0<br>0.4/87.7 | 6.5/100<br>0.5/56.8  | 5.6/99.0<br>0.6/36.7 | 4.4/98.7<br>0.4/62.1 | 5.9/98.6<br>1.1/34.9 | 0.1/66.6<br>0.1/15.0 | 2.6/100<br>0.6/55.5  | 5.8/97.2<br>1.0/38.5 |
| GASVPro:8         | 2.3/85.8<br>0.4/48.2 | 1.8/90.2<br>0.4/40.9 | 2.7/93.3<br>0.7/34.8 | 2.6/80.6<br>0.7/19.3 | 2.5/97.8<br>0.5/43.0 | 2.0/98.6<br>0.3/49.6 | 2.2/98.7<br>0.2/48.9 | 2.6/100<br>0.6/36.9  | 2.4/100<br>0.2/50.3  | 1.8/95.5<br>0.2/51.8 | 2.5/100<br>0.4/52.6  | 2.4/100<br>0.3/54.0  | 2.2/97.5<br>0.1/100  | 2.5/100<br>0.2/73.1  | 2.0/100<br>0.2/54.9  | 1.4/98.1<br>0.2/72.1 | 2.2/98.7<br>0.4/37.4 | 0.02/100<br>0/4.2    | 0.8/100<br>0.1/28.8  | 2.2/98.7<br>0.4/49.9 |
| GRIDSS:7          | 5.4/94.6<br>0.7/44.6 | 5.0/98.3<br>0.7/36.9 | 6.7/97.5<br>1.5/36.5 | 2.5/97.8<br>0.5/43.0 | 6.8/96.8<br>1.7/26.5 | 5.5/99.0<br>0.8/49.2 | 6.0/99.5<br>0.6/46.9 | 6.6/98.3<br>1.5/32.0 | 6.3/98.2<br>0.5/48.8 | 4.7/98.8<br>0.5/43.8 | 6.3/99.5<br>1.0/39.3 | 6.2/99.5<br>0.7/51.0 | 5.8/99.5<br>0.4/87.9 | 6.5/100<br>0.5/45.9  | 5.6/99.5<br>0.6/37.9 | 4.4/99.3<br>0.4/66.8 | 5.9/99.0<br>1.1/33.2 | 0.1/100<br>0.1/14.9  | 2.5/100<br>0.4/67.9  | 5.8/98.5<br>1.1/33.9 |
| inGAP-sv:8        | 4.8/95.5<br>0.5/54.5 | 4.5/98.7<br>0.4/47.1 | 5.5/98.5<br>0.9/43.5 | 2.0/98.6<br>0.3/49.6 | 5.5/99.0<br>0.8/49.2 | 5.5/99.0<br>0.8/36.8 | 5.1/99.4<br>0.4/61.8 | 5.4/99.4<br>0.8/42.8 | 5.2/98.9<br>0.3/60.5 | 4.2/98.7<br>0.3/55.9 | 5.3/99.4<br>0.4/51.7 | 5.2/99.4<br>0.4/59.9 | 5.0/99.4<br>0.2/100  | 5.4/100<br>0.3/73.1  | 4.8/99.4<br>0.4/45.2 | 4.1/99.3<br>0.2/80.8 | 5.0/99.4<br>0.7/48.8 | 0/0<br>0/11.5        | 2.1/100<br>0.3/70.1  | 5.0/99.4<br>0.5/50.2 |
| Lumpy:9           | 4.9/97.7<br>0.3/75.3 | 4.8/98.2<br>0.2/57.0 | 5.9/99.0<br>0.7/52.7 | 2.2/98.7<br>0.2/48.9 | 6.0/99.5<br>0.6/46.9 | 5.1/99.4<br>0.4/61.8 | 6.0/100<br>0.7/40.2  | 6.0/100<br>0.6/50.3  | 5.6/99.0<br>0.2/68.5 | 4.5/98.7<br>0.2/92.9 | 5.7/100<br>0.4/79.1  | 5.4/100<br>0.3/90.8  | 5.2/100<br>0.2/100   | 5.9/100<br>0.4/50.4  | 5.3/100<br>0.3/71.2  | 4.3/100<br>0.3/64.8  | 5.5/99.4<br>0.5/69.4 | 0.02/50.0<br>0/15.2  | 2.3/100<br>0.4/76.2  | 5.6/100<br>0.4/47.1  |
| Manta:3           | 5.3/96.0<br>0.7/44.1 | 4.9/97.8<br>0.7/37.4 | 6.5/97.5<br>1.5/34.9 | 2.6/100<br>0.6/36.9  | 6.6/98.3<br>1.5/32.0 | 5.4/99.4<br>0.8/42.8 | 6.0/100<br>0.6/50.3  | 6.7/98.3<br>1.6/26.1 | 6.2/98.6<br>0.5/45.2 | 4.7/98.2<br>0.5/44.0 | 6.3/99.5<br>0.9/38.1 | 6.1/100<br>0.6/45.1  | 5.7/99.5<br>0.3/90.4 | 6.4/100<br>0.4/44.9  | 5.6/100<br>0.6/35.7  | 4.4/99.3<br>0.4/57.6 | 5.8/99.0<br>1.1/34.1 | 0.1/75.0<br>0.1/15.4 | 2.5/100<br>0.4/56.6  | 5.9/99.5<br>1.0/33.5 |
| Meerkat:7         | 5.1/95.8<br>0.2/61.3 | 4.6/98.8<br>0.2/48.8 | 6.3/97.8<br>0.5/45.9 | 2.4/100<br>0.2/50.3  | 6.3/98.2<br>0.5/48.8 | 5.2/98.9<br>0.3/60.5 | 5.6/99.0<br>0.2/68.5 | 6.2/98.6<br>0.5/45.2 | 6.9/92.9<br>0.6/33.7 | 4.4/96.9<br>0.2/66.6 | 6.1/95.6<br>0.4/56.7 | 6.2/98.9<br>0.2/67.0 | 6.1/95.6<br>0.1/50.0 | 5.8/98.5<br>0.2/76.3 | 5.4/98.9<br>0.2/53.1 | 4.2/98.0<br>0.2/71.7 | 5.8/97.6<br>0.4/54.0 | 0.1/75.0<br>0/29.2   | 2.6/97.9<br>0.2/61.0 | 5.5/98.5<br>0.4/54.2 |
| MetaSV:3          | 4.3/99.3<br>0.3/61.6 | 4.2/98.0<br>0.4/44.2 | 4.7/98.8<br>0.5/47.2 | 1.8/95.5<br>0.2/51.8 | 4.7/98.8<br>0.5/43.8 | 4.2/98.7<br>0.3/55.9 | 4.5/98.7<br>0.2/92.9 | 4.7/98.2<br>0.5/44.0 | 4.4/96.9<br>0.2/66.6 | 4.6/98.8<br>0.5/44.2 | 4.6/98.8<br>0.4/49.2 | 4.6/98.8<br>0.3/61.4 | 4.3/99.3<br>0.1/66.7 | 4.5/100<br>0.1/83.9  | 4.2/99.3<br>0.2/48.4 | 3.4/99.1<br>0.1/56.7 | 4.4/100<br>0.4/50.1  | 0.02/100<br>0.1/30.9 | 1.8/100<br>0.1/83.3  | 4.3/99.3<br>0.3/41.6 |
| Pindel:9          | 5.2/97.4<br>0.5/46.8 | 4.8/98.8<br>0.4/40.3 | 6.3/99.1<br>1.0/43.6 | 2.5/100<br>0.4/52.6  | 6.3/99.5<br>1.0/39.3 | 5.3/99.4<br>0.4/51.7 | 5.7/100<br>0.4/79.1  | 6.3/99.5<br>0.9/38.1 | 6.2/96.9<br>0.4/56.7 | 4.6/98.8<br>0.4/49.2 | 6.8/98.4<br>1.1/30.4 | 6.1/98.6<br>0.5/53.2 | 5.6/98.5<br>0.2/78.4 | 6.3/100<br>0.3/80.1  | 5.4/100<br>0.5/49.3  | 4.2/99.3<br>0.3/80.5 | 5.6/98.5<br>0.7/41.3 | 0.1/62.5<br>0.1/14.8 | 2.5/100<br>0.4/60.1  | 5.6/99.5<br>0.7/40.5 |
| PRISM:3           | 5.5/97.0<br>0.5/46.6 | 5.0/98.9<br>0.4/56.8 | 6.3/99.5<br>0.7/47.0 | 2.4/100<br>0.3/54.0  | 6.2/99.5<br>0.7/51.0 | 5.2/99.4<br>0.4/59.9 | 5.4/100<br>0.3/90.8  | 6.1/100<br>0.6/45.1  | 6.1/95.6<br>0.2/67.0 | 4.6/98.8<br>0.5/53.2 | 6.1/98.6<br>0.8/36.7 | 6.8/95.7<br>0.2/81.4 | 6.0/99.0<br>0.2/81.4 | 6.2/99.5<br>0.2/86.9 | 5.3/99.4<br>0.4/53.5 | 3.9/99.2<br>0.3/80.0 | 5.6/98.5<br>0.5/44.6 | 0.1/87.5<br>0/2.3    | 2.7/100<br>0.3/56.9  | 5.3/100<br>0.5/58.6  |
| Sniffles:3        | 5.1/94.8<br>0.2/75.0 | 4.7/98.8<br>0.2/84.3 | 5.8/99.0<br>0.4/87.7 | 2.2/97.5<br>0.1/100  | 5.8/99.5<br>0.4/87.9 | 5.0/99.4<br>0.2/100  | 5.2/100<br>0.2/100   | 5.7/99.5<br>0.3/90.4 | 5.8/98.5<br>0.1/50.0 | 4.3/99.3<br>0.1/66.7 | 5.6/98.5<br>0.2/78.4 | 6.0/99.0<br>0.2/81.4 | 6.2/70.3<br>0.6/44.1 | 5.8/94.5<br>0.2/100  | 5.0/95.7<br>0.2/80.8 | 3.8/95.1<br>0.1/91.7 | 5.3/93.6<br>0.2/81.4 | 0.1/50.0<br>0/33.3   | 2.3/93.3<br>0.3/62.7 | 5.0/96.2<br>0.3/96.8 |
| SoftSV:7          | 5.3/96.9<br>0.2/75.9 | 4.8/98.8<br>0.2/50.0 | 6.5/100<br>0.5/56.8  | 2.5/100<br>0.2/73.1  | 6.5/100<br>0.5/45.9  | 5.4/100<br>0.3/73.1  | 5.9/100<br>0.4/50.4  | 6.4/100<br>0.4/44.9  | 6.5/98.7<br>0.2/76.3 | 4.5/100<br>0.1/83.9  | 6.3/100<br>0.3/80.1  | 6.2/99.5<br>0.2/86.9 | 5.8/94.5<br>0.2/100  | 7.0/100<br>0.5/35.1  | 5.5/100<br>0.3/74.7  | 4.3/99.3<br>0.3/66.0 | 5.9/99.0<br>0.3/67.2 | 0.1/75.0<br>0/16.5   | 2.5/100<br>0.3/82.1  | 5.7/100<br>0.4/50.2  |
| SvABA:3           | 4.8/96.1<br>0.4/41.9 | 4.6/98.2<br>0.4/49.2 | 5.6/99.0<br>0.6/36.7 | 2.0/100<br>0.2/54.9  | 5.6/99.5<br>0.6/37.9 | 4.8/99.4<br>0.4/45.2 | 5.3/100<br>0.3/71.2  | 5.6/100<br>0.6/35.7  | 5.4/98.9<br>0.2/53.1 | 4.2/99.3<br>0.2/48.4 | 5.4/100<br>0.5/49.3  | 5.3/99.4<br>0.4/53.5 | 5.0/95.7<br>0.2/80.8 | 5.5/100<br>0.3/74.7  | 5.6/99.5<br>0.7/33.8 | 3.9/99.3<br>0.2/63.0 | 5.1/98.9<br>0.4/37.5 | 0.1/80.0<br>0.1/20.0 | 2.1/100<br>0.3/71.5  | 5.1/99.4<br>0.5/39.3 |
| SVELter:3         | 3.6/96.9<br>0.1/76.9 | 3.5/98.4<br>0.1/56.7 | 4.4/98.7<br>0.4/62.1 | 1.4/98.1<br>0.2/72.1 | 4.4/99.3<br>0.4/66.8 | 4.1/99.3<br>0.2/80.8 | 4.3/100<br>0.3/64.8  | 4.4/99.3<br>0.4/57.6 | 4.2/98.0<br>0.2/71.7 | 3.4/99.1<br>0.1/56.7 | 4.2/99.3<br>0.3/80.5 | 3.9/99.2<br>0.1/83.0 | 3.8/95.1<br>0.1/91.7 | 4.3/99.3<br>0.3/66.0 | 3.9/99.3<br>0.2/63.0 | 4.4/89.8<br>0.4/47.1 | 4.1/100<br>0.3/81.5  | 0.02/100<br>0/28.1   | 1.5/100<br>0.2/84.7  | 4.2/100<br>0.3/60.8  |
| TIDDIT:8          | 5.5/92.5<br>0.9/44.3 | 4.7/94.9<br>0.8/41.8 | 5.9/98.6<br>1.1/34.9 | 2.2/98.7<br>0.4/37.4 | 5.9/99.0<br>1.1/33.2 | 5.0/99.4<br>0.7/48.8 | 5.5/99.4<br>0.5/69.4 | 5.8/99.0<br>1.1/34.1 | 5.8/97.6<br>0.4/54.0 | 4.4/100<br>0.4/50.1  | 5.6/98.5<br>0.7/41.3 | 5.6/98.5<br>0.5/44.6 | 5.3/93.6<br>0.2/81.4 | 5.9/99.0<br>0.3/67.2 | 5.1/98.9<br>0.4/37.5 | 4.1/100<br>0.3/81.5  | 6.5/89.9<br>1.5/27.0 | 2.2/98.7<br>0.2/18.6 | 2.4/98.8<br>0.4/56.0 | 5.4/98.9<br>0.9/42.5 |
| Ulysses:3         | 1.6/82.1<br>0.1/24.0 | 1.9/85.3<br>0.1/19.7 | 0.1/66.6<br>0.1/15.0 | 0.02/100<br>0/4.2    | 0.1/100<br>0.1/14.9  | 0/0<br>0/11.5        | 0.02/50.0<br>0/15.2  | 0.1/75.0<br>0.1/15.4 | 0.1/75.0<br>0/29.2   | 0.02/100<br>0.1/30.9 | 0.1/82.5<br>0.1/14.8 | 0.1/87.5<br>0/2.3    | 0.1/50.0<br>0/33.3   | 0.1/75.0<br>0/16.5   | 0.1/80.0<br>0.1/20.0 | 0.02/100<br>0/28.1   | 2.2/98.7<br>0.2/18.6 | 2.4/78.3<br>0.4/8.0  | 1.1/95.3<br>0.2/35.8 | 2.3/97.6<br>0.1/20.6 |
| VariationHunter:4 | 2.1/93.9<br>0.3/44.4 | 1.8/88.3<br>0.2/55.8 | 2.6/100<br>0.6/55.5  | 0.8/100<br>0.1/28.8  | 2.5/100<br>0.4/67.9  | 2.1/100<br>0.3/70.1  | 2.3/100<br>0.4/76.2  | 2.5/100<br>0.4/56.6  | 2.6/97.9<br>0.2/61.0 | 1.8/100<br>0.1/83.3  | 2.5/100<br>0.4/60.1  | 2.7/100<br>0.3/56.9  | 2.3/93.3<br>0.3/62.7 | 2.5/100<br>0.3/82.1  | 2.1/100<br>0.3/71.5  | 1.5/100<br>0.2/84.7  | 2.4/98.8<br>0.4/56.0 | 1.1/95.3<br>0.2/35.8 | 2.8/90.9<br>0.1/19.0 | 2.2/100<br>0.3/85.8  |
| Wham:5            | 4.8/96.0<br>0.5/51.5 | 4.6/97.6<br>0.5/38.5 | 5.8/97.2<br>1.0/38.5 | 2.2/98.7<br>0.4/49.9 | 5.8/98.5<br>1.1/33.9 | 5.0/99.4<br>0.5/50.2 | 5.6/100<br>0.4/47.1  | 5.9/99.5<br>1.0/33.5 | 5.5/98.5<br>0.4/54.2 | 4.3/99.3<br>0.3/41.6 | 5.6/99.5<br>0.7/40.5 | 5.3/100<br>0.5/58.6  | 5.0/96.2<br>0.3/96.8 | 5.7/100<br>0.4/50.2  | 5.1/99.4<br>0.5/39.3 | 4.2/100<br>0.3/60.8  | 5.4/98.9<br>0.9/42.5 | 2.3/97.6<br>0.1/20.6 | 2.2/100<br>0.3/85.8  | 5.9/95.1<br>1.1/23.9 |

**Figure S22. Recall and precision of SVs commonly called between a pair of SV detection algorithms for the INV category.** INVs, called using the indicated algorithms, were filtered with the minimum number of reads supporting the called SVs, indicated with the suffix number of the algorithm name. The INVs overlapping between the filtered SV sets from a pair of the indicated algorithms were selected, and the recall and precision of the selected INVs were determined. Recall and precision percentages are presented as in Figure S15. The data contained in the top 20th percentile of the combined precision scores for the simulated and real data are highlighted with a red background, and the next data contained in the top 21st–50th percentile of the combined precision scores are shown with a pale red background.

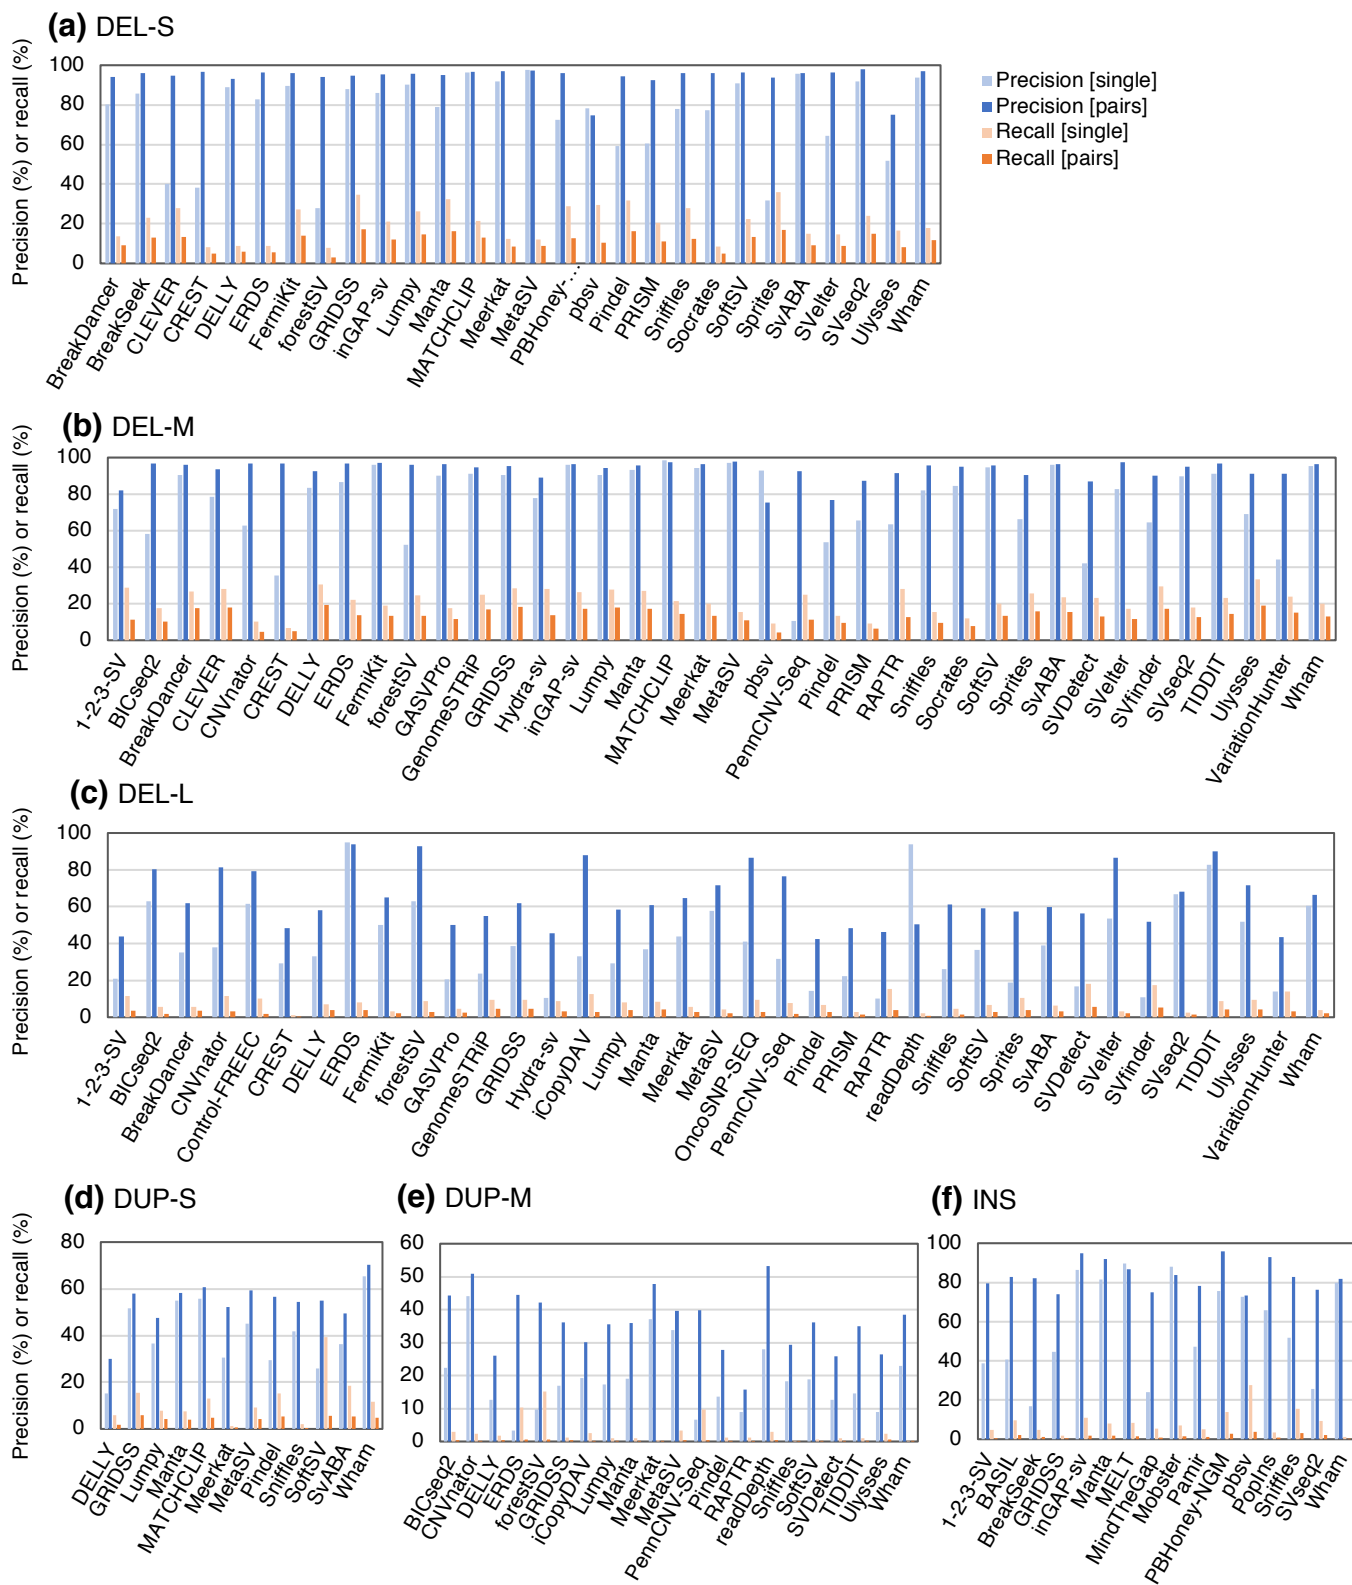

**Figure S23. Mean precision and recall of overlapped calls between SV detection**

**algorithms.** Mean precision and recall values of overlapped calls between pairs of algorithms were determined for the different SV categories, DEL-S (a), DEL-M (b), DUP-L (c), DUP-S (d), DUP-M (e), and INS (f), using four (or three) sets of NA12878 real data. The mean precision and the mean recall are indicated with blue and orange bars, respectively. The precision and recall obtained with the indicated single tool are shown as light blue and light orange bars, respectively. The numerical data, including those for the other SV categories, are presented in Table S17 in Additional file 3.



**Table S1.** SV detection algorithms used in this study

| Algorithms    | SV types *1             | Detection methods *2 | Input data | Version (released year) | Reference |
|---------------|-------------------------|----------------------|------------|-------------------------|-----------|
| 1-2-3-SV      | DEL, INS, INV, TRA      | RP                   | bam        | 1 (2012)                | url *8    |
| AS-GENSENG    | DEL, DUP                | RD                   | bam        | 1.0.2 (2015)            | [1]       |
| BASIL-ANISE   | INS                     | RP, AS               | bam        | 0.3.0 (2015)            | [2]       |
| BatVI         | VEI                     | RP, SR               | fastq      | 1.02 (2017)             | [3]       |
| BICseq2       | DEL, DUP                | RD                   | bam        | 0.2.4/0.7.2 (2016)      | [4]       |
| BreakDancer   | DEL, INS, INV, TRA      | RP                   | bam        | 1.3.6 (2015)            | [5]       |
| BreakSeek     | DEL, INS                | RP, SR               | bam        | 1.2 (2015)              | [6]       |
| BreakSeq2     | DEL, INS                | SV-library           | bam        | 2.2 (2015)              | [7]       |
| Breakway      | DEL, INS                | RP                   | bam        | 0.7.1 (2011)            | [8]       |
| CLEVER        | DEL, INS                | RP                   | bam        | 2 (2015)                | [9]       |
| CNVnator      | DEL, DUP                | RD                   | bam        | 0.3.2 (2015)            | [10]      |
| Control-FREEC | DEL, DUP                | RD                   | bam        | 8.7 (2016)              | [11]      |
| CREST         | DEL, INS, INV, TRA      | RP, SR, AS           | bam        | 1.0 (2011)              | [12]      |
| DELLY         | DEL, DUP, INV, TRA      | RP, SR               | bam        | 0.7.2 (2016)            | [13]      |
| DIGTYPER      | DUP, INV (genotyping)   | RP, SR               | bam        | unknown (2017)          | [14]      |
| DINUMT        | NUMT                    | RP                   | bam        | 0.0.23 (2014)           | [15]      |
| ERDS          | DEL, DUP                | RP, SR, RD           | bam        | 1.1 (2013)              | [16]      |
| FermiKit      | DEL, INS                | AS                   | fastq      | 0.13 (2015)             | [17]      |
| forestSV      | DEL, DUP                | RP, RD, RF           | bam        | 0.3.3 (2013)            | [18]      |
| GASVpro       | DEL, INV                | RP, RD               | bam        | 1.2.1 (2013)            | [19]      |
| GenomeSTRiP   | DEL [MS *4]             | RP, RD               | bam        | 2.00 (2016)             | [20]      |
| GRIDSS        | DEL, DUP, INS, INV, TRA | RP, SR, AS           | bam        | 1.5.0 (2017)            | [21]      |
| HGT-ID        | VEI                     | RP, SR               | bam        | 1.0 (2018)              | [22]      |
| Hydra-sv      | DEL                     | RP, AS               | bam        | 0.5.3 (2014)            | [23]      |
| iCopyDAV      | DEL, DUP                | RD                   | bam        | 1.0 (2018)              | [24]      |
| indelMINER    | DEL                     | RP, SR               | bam        | 0.10 (2015)             | [25]      |
| inGAP-sv      | DEL, DUP, INS, INV      | RP, RD               | sam        | 3.1.1 (2014)            | [26]      |
| ITIS          | MEI                     | RP, SR               | bam        | 1.0 (2015)              | [27]      |

|                       |                         |                   |                        |                    |                   |
|-----------------------|-------------------------|-------------------|------------------------|--------------------|-------------------|
| laSV                  | DEL, DUP, INV, TRA      | AS                | fastq                  | 1.0.2 (2015)       | [28]              |
| Lumpy                 | DEL, DUP, INV, TRA      | RP, SR, RD        | bam                    | 0.2.9 (2015)       | [29]              |
| Manta                 | DEL, DUP, INS, INV, TRA | RP, SR, AS        | bam                    | 0.29.5 (2016)      | [30]              |
| MATCHCLIP             | DEL, DUP                | RP, SR, RD        | bam                    | 2.0 (2013)         | [31]              |
| Meerkat               | DEL, DUP, INS, INV, TRA | RP, SR            | bam                    | 0.185 (2015)       | [32]              |
| MELT                  | MEI, (NUMT)             | RP, (SR)          | bam                    | 2.0.1 (2016)       | [33]              |
| MetaSV                | DEL, DUP, INS, INV      | Meta (RP, SR, RD) | bam, etc <sup>*6</sup> | 0.5.2 (2016)       | [34]              |
| MindTheGap            | INS                     | k-mer, AS         | fastq                  | 0.6447 (2014)      | [35]              |
| Mobster               | MEI, (NUMT, VEI)        | RP, SR            | bam                    | 0.2.4.1 (2018)     | [36]              |
| OncoSNP-SEQ           | DEL, DUP                | RD                | bam                    | 2.0 (2015)         | [37]              |
| Pamir                 | INS                     | RP, SR, AS        | fastq, bam             | unknown (2017)     | [38]              |
| PBHoney <sup>*3</sup> | DEL, INS                | LR (SR, SP)       | fastq                  | 15.8.24 (2015)     | [39]              |
| pbsv                  | DEL, INS                | LR                | fastq, bam             | In SMRTLink v5.0.1 | url <sup>*9</sup> |
| PennCNV-Seq           | DEL, DUP                | RD                | bam                    | Unknown (2017)     | [40]              |
| Pindel                | DEL, DUP, INS, INV, TRA | SR                | bam                    | 0.2.5 (2015)       | [41]              |
| PopIns                | INS                     | RP, SR, AS        | bam                    | unknown (2015)     | [42]              |
| PRISM                 | DEL, INS, INV           | RP, SR            | sam                    | 1.1.6 (2012)       | [43]              |
| RAPTR-SV              | DEL, DUP, INS           | RP, SR            | bam                    | 0.0.15 (2015)      | [44]              |
| readDepth             | DEL, DUP                | RD                | bam                    | 0.9.8.4 (2015)     | [45]              |
| RetroSeq              | MEI                     | RP, SR            | bam                    | 1.41 (2014)        | [46]              |
| Sniffles              | DEL, DUP, INS, INV, TRA | LR (SR)           | bam                    | 1.0.6 (2017)       | [47]              |
| Socrates              | DEL, INS                | SR                | bam                    | 1.1 (2015)         | [48]              |
| SoftSearch            | DEL, DUP, INS, INV, TRA | RP, SR            | bam                    | 2.4 (2014)         | [49]              |
| SoftSV                | DEL, DUP, INV, TRA      | RP, SR            | bam                    | 1.4.2 (2015)       | [50]              |
| SoloDel               | DEL                     | RP, RD            | bam                    | 1.0.0 (2015)       | [51]              |
| Sprites               | DEL                     | SR                | bam                    | 0.3 (2016)         | [52]              |
| SV <sup>2</sup>       | DEL, DUP (genotyping)   | RP, SR, RD        | bam                    | 1.4.0 (2017)       | [53]              |
| SvABA                 | DEL, DUP, INS, INV      | RP, SR, AS        | bam                    | 0.2.1 (2017)       | [54]              |
| SVDetect              | DEL, DUP, INS, INV, TRA | RP                | bam                    | 0.8b (2013)        | [55]              |
| SVelter               | DEL, DUP, INV           | RP, SR, RD        | bam                    | 1.1 (2016)         | [56]              |
| SVfinder              | DEL, INS, INV, TRA      | RP                | bam                    | unknown (2014)     | [57]              |
| SVSeq2                | DEL, INS                | SR                | bam                    | 2.2 (2015)         | [58]              |

|                 |                                        |            |                      |                |      |
|-----------------|----------------------------------------|------------|----------------------|----------------|------|
| Tangram         | MEI                                    | RP, SR     | bam                  | 0.3.1 (2015)   | [59] |
| Tea             | MEI                                    | RP, SR     | bam                  | 0.6.2 (2015)   | [60] |
| TEMP            | MEI                                    | RP, SR     | bam                  | 1.0.5 (2017)   | [61] |
| TIDDIT          | DEL, DUP, INV, TRA                     | RP, SR, RD | bam                  | 1.0.2 (2017)   | [62] |
| Ulysses         | DEL, DUP, INV [MP-lib * <sup>5</sup> ] | RP         | bam                  | 1.0 (2015)     | [63] |
| VariationHunter | DEL, INS, INV                          | RP         | divet * <sup>7</sup> | 0.04 (2012)    | [64] |
| VirusFinder2    | VEI                                    | Others     | bam                  | 2.0 (2015)     | [65] |
| VirusSeq        | VEI                                    | RP         | fastq                | Unknown (2012) | [66] |
| Wham            | DEL, DUP, INS, INV                     | RP, SR     | bam                  | 1.8 (2016)     | [67] |

\*<sup>1</sup> MEI: mobile element insertion, NUMT: nuclear mitochondrial genome insertion, VEI: virus element insertion. For MELT and Mobster, NUMT and/or VEI can be detected by a modification of the pipelines.

\*<sup>2</sup> RP: read pairs-based signal, RD: read depth-based signal, SR: split (soft-clipped) reads-based signal, AS: assembly-based approach, LR: method using long reads, SP: signals within the span of reads, SV library: short read mapping to the break point regions from the public SV libraries, RF: Random Forest classifiers, Meta: integrating outputs from multiple algorithms, k-mer: k-mer-based detection of insertion sites, Others: using CREST and SVDetect to detect virus integration sites.

\*<sup>3</sup> PBHoney uses PacBio reads as input. PBHoney-NGM used in this study is a modification of PBHoney, that uses the NGM-LR long read aligner (v0.2.6b) and altered options instead of using the blasr aligner and the default options.

\*<sup>4</sup> MS: optimized for SV calling with multiple samples.

\*<sup>5</sup> MP-lib: optimized for data with mate-pair libraries.

\*<sup>6</sup> Output files from BreakDancer, Pindel, CNVnator, and BreakSeq2.

\*<sup>7</sup> DIVET alignment file with mrFAST.

\*<sup>8</sup> <https://github.com/Vityay/1-2-3-SV>.

\*<sup>9</sup> <https://github.com/PacificBiosciences/pbsv>.

**Table S2.** List of algorithms that did not work in our computational environment

| Algorithms    | SV type                 | Version (release year) | Reference |
|---------------|-------------------------|------------------------|-----------|
| Alu-detect    | MEI (ALU)               | 1.3 (2015)             | [68]      |
| Gustaf        | DEL, DUP, INV, TRA      | 1.0.9 (2017)           | [69]      |
| ngs_te_mapper | MEI                     | Unknown (2015)         | [70]      |
| PEMer         | DEL, INS, INV           | Unknown (2009)         | [71]      |
| PeSV-Fisher   | DEL, DUP, INV, TRA      | 0.93 (2012)            | [72]      |
| RelocaTE      | MEI                     | 1.0.5 (2014)           | [73]      |
| RDXplorer     | DEL, DUP                | 3.2 (2012)             | [74]      |
| Spanner       | DEL, DUP, INV, TRA, MEI | 7.0 (2011)             | *1        |
| TE-locate     | MEI                     | 1.0 (2015)             | [75]      |
| TE-Tracker    | MEI                     | Unknown (2016)         | [76]      |

\*1 <https://github.com/chipstewart/Spanner>.

**Table S3.** Whole genome sequencing reads used in this study

| Human WGS data                                           | Read length (bp) | Insert size (bp) | Genome coverage | Platform     | Accession number of NCBI SRA or DDBJ DRA                     |
|----------------------------------------------------------|------------------|------------------|-----------------|--------------|--------------------------------------------------------------|
| NA12878 (data1) <sup>*1</sup>                            | 100, 102         | 320              | 31×             | HiSeq 2000   | ERP001775<br>(ERR174336–ERR174340)                           |
| NA12878 (data2) <sup>*2</sup>                            | 101              | 318              | 30×             | HiSeq 2000   | ERP001229<br>(ERR091571–ERR091573)                           |
| NA12878 (data3) <sup>*3</sup>                            | 148              | 546              | 31×             | HiSeq 2500   | SRP047086<br>(SRR2052337–SRR2052352)                         |
| NA12878 (data4) <sup>*4</sup>                            | 251              | 681              | 30×             | HiSeq 2500   | SRP056043<br>(SRR1910373)                                    |
| NA12891 <sup>*5</sup>                                    | 101              | 296              | 52×             | HiSeq 2000   | ERR194160                                                    |
| NA12892 <sup>*5</sup>                                    | 101              | 303              | 56×             | HiSeq 2000   | ERR194161                                                    |
| NA12878<br>(PacBio-data1) <sup>*6</sup>                  | 7,424            | –                | 10×             | PacBio RS II | SRP043609<br>(SRR1947646–SRR1950271)                         |
| NA12878<br>(PacBio-data2) <sup>*7</sup>                  | 19,647           | –                | 10×             | PacBio RS II | SRP076397<br>(SRR3658380–SRR3658389)                         |
| NA12878<br>(PacBio-data3) <sup>*8</sup>                  | 7,716            | –                | 10.5×           | Sequel       | Obtained at the PacBio website<br><sup>*13</sup>             |
| HG00514 <sup>*9</sup>                                    | 125              | 572              | 30×             | HiSeq 2500   | ERR894729, ERR903030                                         |
| HG00514<br>(PacBio-HG00514) <sup>*10</sup>               | 15,994           | –                | 10×             | PacBio RS II | ERX1366175, ERR125124,<br>ERR125128, ERR125130,<br>ERR125132 |
| HG002<br>(PacBio-HG002) <sup>*11</sup>                   | 7,278            | –                | 10×             | PacBio RS II | SRX1033794                                                   |
| Simulated data (Sim-A,<br>Sim-MEI, Sim-VEI,<br>Sim-NUMT) | 125              | 500              | 30×             | –            | Data generated with the VarSim<br>and ART simulators         |
| Simulated data<br>(Sim-A-PacBio) <sup>*12</sup>          | 7,500            | –                | 10×             | –            | Data generated with the PBSIM<br>simulator                   |

\*<sup>1</sup> NA12878 (data1): Deep whole genome sequence data from the CEPH 1463 family (Illumina Platinum Genomes).

\*<sup>2</sup> NA12878 (data2): Whole human genome sequencing of an CEPH/UTAH female individual (HapMap: NA12878) using the Illumina HiSeq 2000 and paired 100 base reads.

\*<sup>3</sup> NA12878 (data3): A public-private-academic consortium hosted by NIST to develop reference materials and standards for clinical sequencing.

\*<sup>4</sup> NA12878 (data4): Homo sapiens PCR-free whole genome shotgun sequencing of NA12878.

\*<sup>5</sup> NA12891, NA12892: parents of NA12978, deep whole genome sequence data from the CEPH 1463 family (Illumina Platinum Genomes).

\*<sup>6</sup> NA12878 (PacBio-data1): Mean read size: 7,424 bp, N50 of reads: 15,401 bp, sequenced with PacBio RS II and P5-C3 chemistry.

\*<sup>7</sup> NA12878 (PacBio-data2): Mean read size: 19,647 bp, N50 of reads: 29,247 bp.

\*<sup>8</sup> NA12878 (PacBio-data3): Mean read size: 7,716 bp, N50 of reads: 11,823 bp, sequenced with the PacBio Sequel system.

\*<sup>9</sup> HG00514: Illumina PCR-free sequencing of 1000 Genomes Han Chinese trios for SV discovery.

\*<sup>10</sup> HG00514 PacBio data from the Human Genome Structural Variation Consortium.

\*<sup>11</sup> HG002 PacBio data from the Genome in a Bottle (GIAB) Consortium.

\*<sup>12</sup> Sim-A-PacBio: Mean read size: 7,500 bp, N50 of reads: 7,846 bp, generated with the PBSIM simulator.

\*<sup>13</sup>

<http://www.pacb.com/blog/identifying-structural-variants-na12878-low-fold-coverage-sequencing-pacbio-sequel-system/>.

**Table S4.** Components of reference SVs for real and simulated datasets**(A) Sim-A and Real data**

| Data set                         | Number of reference SVs    |                           |                           |                           |                  |             |              |              |                |                  |              |
|----------------------------------|----------------------------|---------------------------|---------------------------|---------------------------|------------------|-------------|--------------|--------------|----------------|------------------|--------------|
|                                  | DEL                        |                           |                           |                           |                  | DUP         |              |              |                | INS              | INV          |
|                                  | SS * <sup>1</sup><br>[Het] | S * <sup>2</sup><br>[Het] | M * <sup>3</sup><br>[Het] | L * <sup>4</sup><br>[Het] | Total<br>[Het]   | S<br>[Het]  | M<br>[Het]   | L<br>[Het]   | Total<br>[Het] | [Het]            | [Het]        |
| Sim-A                            | 122<br>[71]                | 1,937<br>[1,133]          | 1,301<br>[760]            | 166<br>[100]              | 3,526<br>[2,064] | 166<br>[83] | 998<br>[553] | 492<br>[295] | 1,656<br>[931] | 2,819<br>[1,667] | 309<br>[190] |
| Real<br>(NA12878)                | 1,192                      | 5,558                     | 2,332                     | 102                       | 9,184            | 877         | 1,585        | 146          | 2,608          | 13,669           | 275          |
| Real-GT<br>(NA12878)             | 0                          | 36<br>[22]                | 283<br>[196]              | 16<br>[6]                 | 335<br>[224]     | 17<br>[11]  | 88<br>[48]   | 15<br>[8]    | 120<br>[67]    | 0                | 0            |
| Real<br>(HG00514) * <sup>5</sup> | 4,782                      | 7,604                     | 2,838                     | 28                        | 15,249           | 472         | 537          | 18           | 1,027          | 16,543           | 0            |
| Real<br>(HG002) * <sup>5</sup>   | 13,869                     | 7,487                     | 1,572                     | 39                        | 22,967           | 0           | 0            | 0            | 0              | 22,864           | 0            |

\*<sup>1</sup> Super small size: 50–100 bp.

\*<sup>2</sup> Small size: 101–1,000 bp (50–1,000 bp for DUP).

\*<sup>3</sup> Middle size: 1,001–100,000 bp.

\*<sup>4</sup> Large size: 100,001–2,000,000 bp.

\*<sup>5</sup> A minimal 30 bp of variants were extracted.

The number of heterozygous alleles is indicated within brackets.

**(B) Sim-MEI, Sim-NUMT, and Sim-VEI data**

| Data set | Number of reference SVs                             |               |              |
|----------|-----------------------------------------------------|---------------|--------------|
|          | MEI<br>[Het]                                        | NUMT<br>[Het] | VEI<br>[Het] |
| Sim-MEI  | 651 (ALU: 480, L1: 94, SVA: 37, HERVK: 40)<br>[429] | 0             | 0            |
| Sim-NUMT | 0                                                   | 200<br>[132]  | 0            |
| Sim-VEI  | 0                                                   | 0             | 100<br>[64]  |

These simulation data were generated only for chromosome 17.

The number of heterozygous alleles is indicated within brackets.

**(C) Component of SVs identified in the 1000 Genomes project [77]**

| SV type           | All Types | DEL    | DUP   | INV | MEI    | NUMT |
|-------------------|-----------|--------|-------|-----|--------|------|
| Total SV number   | 68,818    | 42,279 | 8,954 | 786 | 16,631 | 168  |
| Number per sample | 4,405     | 2,788  | 357   | 37  | 1,218  | 5    |

**Table S12.** Effect of the length, insert size, and coverage of reads on precision and recall of SV detection algorithms (summarized data from Figure S13 in Additional file 2)

| SV type | Algorithms  | Read length |        | Insert size |        | Read coverage |        |
|---------|-------------|-------------|--------|-------------|--------|---------------|--------|
|         |             | Precision   | Recall | Precision   | Recall | Precision     | Recall |
| DEL     | 1-2-3-SV    | I           | C      | D           | D      | D             | I      |
|         | BreakDancer | C           | C      | D           | D      | I             | I      |
|         | CLEVER      | R-125       | D      | I-500       | I      | C             | I      |
|         | CNVnator    | C           | C      | C           | C      | D             | I      |
|         | DELLY       | C           | C      | C           | D      | D             | I      |
|         | forestSV    | C           | C      | C           | C      | I             | I      |
|         | inGAP-sv    | C           | C      | C           | D      | D             | I      |
|         | Lumpy       | C           | I      | C           | I      | D             | I      |
|         | Manta       | C           | U      | C           | C      | D             | I      |
|         | Meerkat     | C           | C      | C           | D      | C             | I      |
|         | MetaSV      | C           | R-125  | C           | D      | C             | I      |
|         | Pindel      | D           | R-125  | C           | C      | D             | I      |
|         | PRISM       | C           | D      | C           | C      | D             | I      |
|         | RAPTR       | I           | C      | D           | D      | D             | I      |
|         | Socrates    | C           | R-125  | C           | C      | C             | I      |
|         | SoftSV      | C           | C      | C           | C      | D             | I      |
| SVseq2  | C           | R-125       | C      | C           | D      | I             |        |
| Ulysses | C           | D           | C      | D           | C      | I             |        |
| DUP     | CNVnator    | C           | C      | C           | C      | D             | C      |
|         | DELLY       | C           | C      | C           | C      | D             | I      |
|         | forestSV    | C           | C      | C           | C      | C             | C      |
|         | inGAP-sv    | C           | C      | C           | C      | I             | I      |
|         | Lumpy       | C           | C      | C           | C      | D             | I      |
|         | Manta       | C           | C      | C           | C      | D             | I      |
|         | Meerkat     | C           | C      | C           | C      | D             | I      |
|         | MetaSV      | I           | R-125  | C           | C      | D             | I      |



|     |             |       |       |       |   |   |   |
|-----|-------------|-------|-------|-------|---|---|---|
|     | Pindel      | I     | R-125 | C     | C | I | I |
|     | RAPTR       | C     | C     | C     | C | D | I |
|     | SoftSV      | I     | C     | C     | C | D | I |
|     | Ulysses     | C     | I     | C     | D | D | U |
| INS | BASIL-ANISE | I     | D     | C     | I | D | I |
|     | BreakDancer | C     | C     | I     | C | D | I |
|     | inGAP-sv    | D     | I     | I     | D | I | I |
|     | Manta       | C     | C     | C     | C | D | I |
|     | PopIns      | C     | D     | C     | I | U | I |
|     | SVseq2      | I     | R-125 | I     | I | D | I |
| INV | 1-2-3-SV    | I     | C     | D     | D | D | I |
|     | BreakDancer | C     | C     | C     | I | D | I |
|     | DELLY       | C     | C     | C     | D | D | I |
|     | inGAP-sv    | C     | I     | C     | D | U | I |
|     | Lumpy       | C     | C     | C     | C | D | I |
|     | Manta       | C     | I     | C     | C | D | U |
|     | Meerkat     | C     | C     | C     | C | C | I |
|     | MetaSV      | C     | R-125 | C     | C | C | I |
|     | Pindel      | R-125 | R-125 | D     | C | D | I |
|     | PRISM       | C     | D     | C     | C | D | I |
|     | SoftSV      | C     | C     | C     | I | D | I |
|     | Ulysses     | D     | I     | I-500 | C | D | D |

I: Increased precision or recall with increased read length, insert size or coverage.

D: Decreased precision or recall with increased read length, insert size or coverage.

C: Constant precision or recall with increased read length, insert size or coverage.

U: Unclear tendency.

Others: the highest precision or recall at the category of the indicated values.

The classification of the precision (recall) tendency into I, D, and C is based on > 5-point differences between the categories (e.g., R-100, R-125, and R-150) at multiple points of the minimum number of supporting reads.

**Table S13.** Mean coefficient of variation of SV detection accuracy for each category of SV type and read property

| SV type | Read library    | Precision CV | Recall CV |
|---------|-----------------|--------------|-----------|
| DEL     | RL              | 0.01         | 0.07      |
|         | IS              | 0.01         | 0.03      |
|         | RC (Sim-A)      | 0.03         | 0.1       |
|         | RC (Real data1) | 0.09         | 0.21      |
| DUP     | RL              | 0.04         | 0.07      |
|         | IS              | 0.03         | 0.04      |
|         | RC (Sim-A)      | 0.07         | 0.07      |
|         | RC (Real data1) | 0.2          | 0.19      |
| INS     | RL              | 0.07         | 0.2       |
|         | IS              | 0.07         | 0.09      |
|         | RC (Sim-A)      | 0.24         | 0.47      |
|         | RC (Real data1) | 0.16         | 0.45      |
| INV     | RL              | 0.02         | 0.09      |
|         | IS              | 0.02         | 0.03      |
|         | RC (Sim-A)      | 0.02         | 0.04      |
|         | RC (Real data1) | 0.27         | 0.22      |

Mean values of coefficient of variation (CV) for each category are indicated. CVs were calculated by dividing the standard deviation of recall or precision percentage with the corresponding mean value.

RL: Read length (100 bp, 125 bp, 150 bp).

IS: Insert size (400 bp, 500 bp, 600 bp).

RC: Read coverage (10×, 20×, 30×, 60×).

**Table S15.** Genotyping precision of SV detection algorithms

| Algorithms          | Type      | TP <sup>*1</sup> | FP <sup>*2</sup> | UnGT <sup>*3</sup> | Precision1 <sup>*4</sup> | Precision2 <sup>*5</sup> |
|---------------------|-----------|------------------|------------------|--------------------|--------------------------|--------------------------|
| AS-GENSENG          | DEL       | 180 (13)         | 4 (0)            | 0 (0)              | 97.8 (100)               | 97.8 (100)               |
|                     | DUP       | 302              | 31               | 0                  | 90.6                     | 90.6                     |
| BICseq2             | DEL       | 1251 (142)       | 82 (4)           | 0 (0)              | 93.8 (97.3)              | 93.8 (97.3)              |
|                     | DUP       | 1054             | 129              | 0                  | 89.1                     | 89.1                     |
| BreakSeq2           | DEL       | 68 (94)          | 17 (4)           | 0 (0)              | 79.7 (94.8)              | 79.7 (94.8)              |
| CNVnator            | DEL       | 779 (115)        | 34 (4)           | 0 (0)              | 95.8 (97.8)              | 95.8 (97.8)              |
|                     | DUP       | 842              | 68               | 46                 | 88.1                     | 92.5                     |
| Control-FREEC       | DEL       | 59 (7)           | 6 (1)            | 0 (0)              | 90.7 (87.5)              | 90.7 (87.5)              |
|                     | DUP       | 223              | 83               | 8                  | 71.1                     | 72.9                     |
| DELLY               | DEL       | 1715 (138)       | 108 (7)          | 3 (3)              | 93.9 (93.2)              | 94.1 (95.2)              |
|                     | DUP       | 840              | 562              | 14                 | 59.3                     | 59.9                     |
|                     | INV       | 225              | 32               | 1                  | 87.2                     | 87.8                     |
| DIGTYPER            | DUP       | 885              | 424              | 159                | 60.3                     | 67.6                     |
|                     | INV       | 214              | 31               | 28                 | 78.4                     | 87.3                     |
| ERDS                | DEL       | 1931 (121)       | 67 (2)           | 15 (1)             | 95.9 (97.6)              | 96.6 (98.4)              |
|                     | DUP       | 611              | 58               | 0                  | 90.5                     | 90.5                     |
| GenomeSTRiP         | DEL       | 542 (43)         | 67 (2)           | 764 (98)           | 39.5 (30.1)              | 89.0 (95.5)              |
| Lumpy <sup>*6</sup> | DEL       | 2246             | 200              | 1                  | 91.8                     | 91.9                     |
|                     | DUP       | 1128             | 210              | 0                  | 84.3                     | 84.3                     |
|                     | INV       | 192              | 26               | 3                  | 86.8                     | 88.0                     |
| Manta               | DEL       | 2393 (133)       | 158 (7)          | 0 (0)              | 93.8 (95.0)              | 93.8 (95.0)              |
|                     | DUP       | 823              | 555              | 0                  | 59.7                     | 59.7                     |
|                     | INS       | 307              | 7                | 0                  | 97.7                     | 97.7                     |
|                     | INV       | 190              | 26               | 0                  | 87.9                     | 87.9                     |
| MELT                | INS (MEI) | 367              | 103              | 0                  | 78.0                     | 78.0                     |
| Pindel              | DEL       | 2413 (2)         | 141 (0)          | 199 (112)          | 87.6 (1.7)               | 94.4 (100)               |
|                     | DUP       | 543              | 534              | 215                | 42.0                     | 50.4                     |
|                     | INV       | 225              | 36               | 0                  | 86.2                     | 86.2                     |
| PopIns              | INS       | 174              | 25               | 118                | 55.0                     | 87.5                     |

|                 |           |            |          |         |             |             |
|-----------------|-----------|------------|----------|---------|-------------|-------------|
| PBHoney         | DEL       | 194 (0)    | 27 (0)   | 1 (0)   | 87.4 (0)    | 87.8 (0)    |
|                 | INS       | 175        | 16       | 0       | 91.6        | 91.6        |
| PennCNV-Seq     | DEL       | 1059 (155) | 46 (3)   | 0 (0)   | 95.8 (98.1) | 95.8 (98.1) |
|                 | DUP       | 1048       | 75       | 0       | 93.3        | 93.3        |
| readDepth       | DEL       | 264 (48)   | 17 (2)   | 0 (0)   | 93.9 (96.0) | 93.9 (96.0) |
|                 | DUP       | 823        | 54       | 0       | 93.8        | 93.8        |
| RetroSeq        | INS (MEI) | 316        | 137      | 0       | 69.7        | 69.7        |
| Sniffles        | DEL       | 2087 (47)  | 644 (22) | 242 (0) | 70.2 (68.1) | 76.4 (68.1) |
|                 | DUP       | 346        | 489      | 479     | 26.3        | 41.4        |
|                 | INS       | 649        | 256      | 50      | 68.0        | 71.7        |
|                 | INV       | 169        | 64       | 6       | 70.7        | 72.5        |
| SV <sup>2</sup> | DEL       | 2202 (133) | 89 (3)   | 641 (4) | 75.1 (95.0) | 96.1 (97.8) |
|                 | DUP       | 692        | 511      | 180     | 50.0        | 57.5        |
| SVelter         | DEL       | 1671 (98)  | 147 (4)  | 0 (0)   | 91.9 (96.1) | 91.9 (96.1) |
|                 | INV       | 129        | 33       | 0       | 79.6        | 79.6        |
| Tangram         | INS (MEI) | 110        | 27       | 8       | 75.8        | 80.2        |

\*<sup>1</sup> TP: Number of correctly called genotypes.

\*<sup>2</sup> FP: Number of wrongly called genotypes.

\*<sup>3</sup> UnGT: Number of true positive calls with undefined genotype.

\*<sup>4</sup> Precision1: Percentage of correctly called genotypes in true positive calls (i.e.,  $TP/(TP + FP + UnGT) \times 100$ ).

\*<sup>5</sup> Precision2: Percentage of correctly called genotypes in true positive calls with genotyped information (i.e.,  $TP/(TP + FP) \times 100$ ).

\*<sup>6</sup> Genotyping of Lumpy calls was conducted using SVTyper.

MELT, RetroSeq, and Tangram were run with the Sim-MEI data, and the other algorithms indicated were run with the Sim-A and real (NA12878) datasets. We selected an RSS filtering threshold at which the sum of the prec1 and prec2 values gave the highest value for each category.

Results for the real data were indicated within parentheses.

**Table S19.** Extended list of algorithms providing good SV calling results for both the simulated and the NA12878 real datasets

| SV type | Size  | Algorithms  | Simulated data |        | Real data |        | RMSE of BP <sup>*1</sup> | Run time <sup>*2</sup> | nF <sup>*3</sup> |
|---------|-------|-------------|----------------|--------|-----------|--------|--------------------------|------------------------|------------------|
|         |       |             | Precision      | Recall | Precision | Recall |                          |                        |                  |
| DEL     | All   | GRIDSS      | 98.9           | 86.6   | 87.6      | 28.9   | 16                       | 17                     | 3.56             |
|         |       | Lumpy       | 99.1           | 81.4   | 87.1      | 26.1   | 77                       | 4                      | 3.41             |
|         |       | SVseq2      | 96.2           | 86.1   | 75.7      | 24.9   | 13                       | 34                     | 3.28             |
|         |       | SoftSV      | 96.8           | 83.6   | 80.2      | 23.2   | 169                      | 44                     | 3.25             |
|         |       | Manta       | 95.9           | 83.1   | 74.2      | 24.3   | 77                       | 63                     | 3.22             |
|         |       | MATCHCLIP   | 99.4           | 71.7   | 91.6      | 20.9   | 83                       | 6.5                    | 3.12             |
|         |       | inGAP-sv    | 91.1           | 78.6   | 78.3      | 22.5   | 19                       | 8                      | 3.11             |
|         |       | FermiKit    | 99.4           | 67.6   | 88.4      | 22.1   | 87                       | 218                    | 3.10             |
|         |       | Sniffles    | 95.6           | 74.9   | 72.9      | 20.6   | 644                      | 1.5                    | 2.98             |
|         |       | Wham        | 94.1           | 71.7   | 84.2      | 17.3   | 38                       | 4                      | 2.87             |
|         |       | pbsv        | 88.8           | 54.6   | 67.2      | 27.9   | 25                       | 9.5                    | 2.84             |
|         |       | Pindel      | 86.7           | 75.3   | 60.6      | 20.5   | 181                      | 44                     | 2.79             |
|         |       | Meerkat     | 93.9           | 70.6   | 82.9      | 15.7   | 714                      | 11                     | 2.77             |
|         |       | Sprites     | 87.3           | 89.5   | 33.3      | 35.9   | 167                      | 16                     | 2.73             |
|         |       | SvABA       | 99.5           | 58.7   | 95.2      | 15.3   | 18                       | 23                     | 2.68             |
|         | DELLY | 98.8        | 57.7           | 77.2   | 15.1      | 23     | 34                       | 2.56                   |                  |
|         | SS    | pbsv        | 52.3           | 80.1   | 48.2      | 44.0   | N.D.                     | 9.5                    | 8.15             |
|         |       | GRIDSS      | 82.4           | 62.6   | 45.5      | 33.2   | N.D.                     | 17                     | 7.90             |
|         |       | Sniffles    | 75.4           | 64.2   | 53.4      | 29.5   | N.D.                     | 1.5                    | 7.78             |
|         |       | PBHoney-NGM | 76.2           | 62.6   | 50.2      | 27.6   | N.D.                     | 8.5                    | 7.51             |
|         |       | SVseq2      | 68.1           | 66.6   | 42.9      | 30.9   | N.D.                     | 34                     | 7.43             |
|         |       | Manta       | 70.0           | 55.5   | 47.3      | 32.6   | N.D.                     | 63                     | 7.38             |
|         |       | Sprites     | 49.7           | 73.0   | 30.3      | 49.5   | N.D.                     | 16                     | 7.05             |
|         |       | PRISM       | 60.0           | 52.3   | 44.4      | 28.7   | N.D.                     | 53                     | 6.67             |
|         | S     | GRIDSS      | 96.5           | 89.0   | 92.1      | 32.1   | 18                       | 17                     | 4.17             |
|         |       | pbsv        | 92.5           | 85.1   | 78.7      | 32.7   | 16                       | 9.5                    | 3.96             |
|         |       | Manta       | 94.6           | 79.5   | 81.6      | 30.5   | 7                        | 63                     | 3.87             |
|         |       | SVseq2      | 94.8           | 84.8   | 82.3      | 27.6   | 9                        | 34                     | 3.84             |
|         |       | Lumpy       | 99.3           | 76.4   | 90.5      | 26.8   | 18                       | 4                      | 3.81             |
|         |       | Sniffles    | 96.0           | 85.9   | 81.5      | 25.7   | 26                       | 1.5                    | 3.78             |

|  |   |             |      |      |      |      |       |     |      |
|--|---|-------------|------|------|------|------|-------|-----|------|
|  |   | SoftSV      | 97.8 | 79.9 | 81.5 | 24.9 | 8     | 44  | 3.72 |
|  |   | FermiKit    | 99.2 | 67.7 | 89.2 | 27.3 | 10    | 218 | 3.69 |
|  |   | PBHoney-NGM | 92.3 | 84   | 75.2 | 24.7 | 33    | 8.5 | 3.62 |
|  |   | Pindel      | 91.1 | 81.5 | 73.7 | 26.1 | 5     | 196 | 3.62 |
|  |   | MATCHCLIP   | 99.6 | 67.8 | 95.5 | 22.1 | 5     | 6.5 | 3.50 |
|  |   | inGAP-sv    | 84.9 | 75.2 | 74.1 | 23.6 | 21    | 8   | 3.39 |
|  |   | CLEVER      | 87.3 | 82.5 | 61.3 | 22.0 | 31    | 47  | 3.32 |
|  | M | Lumpy       | 99.5 | 91.6 | 94.5 | 26.8 | 117   | 4   | 3.03 |
|  | M | DELLY       | 99.9 | 91.9 | 93.8 | 26.6 | 26    | 34  | 3.03 |
|  | M | inGAP-sv    | 99.9 | 90.0 | 95.9 | 26.6 | 17    | 8   | 3.03 |
|  | M | GRIDSS      | 99.5 | 92.3 | 94.2 | 26.4 | 13    | 18  | 3.03 |
|  | M | Manta       | 99.7 | 90.6 | 93.5 | 26.2 | 121   | 63  | 3.00 |
|  | M | GenomeSTRiP | 99.8 | 90.2 | 90.2 | 24.9 | 28    | 25  | 2.94 |
|  | M | Ulysses     | 98.8 | 90.6 | 96.0 | 22.1 | 273   | 11  | 2.89 |
|  | M | SoftSV      | 97.9 | 88.8 | 93.6 | 22.1 | 268   | 44  | 2.85 |
|  | M | SvABA       | 99.8 | 77.6 | 96.0 | 24.1 | 22    | 23  | 2.84 |
|  | M | MATCHCLIP   | 99.4 | 82.0 | 98.5 | 22.2 | 127   | 6.5 | 2.84 |
|  | M | Wham        | 98.3 | 85.0 | 93.5 | 20.8 | 52    | 4   | 2.78 |
|  | M | TIDDIT      | 99.4 | 76.7 | 92.2 | 23.2 | 88    | 3.5 | 2.77 |
|  | M | Meerkat     | 94.1 | 86.9 | 88.8 | 21.1 | 122   | 11  | 2.74 |
|  | M | SVseq2      | 97.6 | 90.5 | 82.2 | 20.3 | 18    | 34  | 2.73 |
|  | M | ERDS        | 95.6 | 80.8 | 86.5 | 22.7 | 128   | 25  | 2.73 |
|  | L | TIDDIT      | 98.6 | 84.4 | 82.8 | 12.0 | 81    | 3.5 | 3.75 |
|  | L | ERDS        | 96.3 | 78.4 | 95.0 | 9.1  | 38    | 25  | 3.37 |
|  | L | forestSV    | 85.3 | 73.0 | 65.4 | 11.4 | 3883  | 33  | 3.29 |
|  | L | CNVnator    | 92.0 | 82.6 | 37.7 | 15.6 | 1500  | 1   | 3.19 |
|  | L | Manta       | 97.3 | 86.8 | 32.6 | 9.1  | 5     | 63  | 3.14 |
|  | L | PennCNV-Seq | 89.8 | 74.8 | 25.0 | 10.7 | 10756 | 72  | 2.84 |
|  | L | SvABA       | 98.6 | 85.6 | 35.6 | 7.6  | 18    | 23  | 3.06 |
|  | L | Meerkat     | 90.6 | 81.4 | 31.8 | 7.1  | 2991  | 11  | 2.83 |
|  | L | Lumpy       | 97.2 | 86.2 | 27.2 | 9.5  | 19    | 4   | 3.00 |
|  | L | MetaSV      | 98.5 | 83.2 | 57.7 | 6.0  | 69    | 1*5 | 2.74 |
|  | L | MATCHCLIP   | 97.4 | 69.4 | 74.9 | 6.2  | 5     | 6.5 | 2.71 |
|  | L | inGAP-sv    | 99.3 | 88.6 | 27.0 | 9.1  | 17    | 8   | 2.69 |
|  | L | BICseq2     | 62.0 | 41.9 | 64.2 | 10.1 | 14893 | 7.7 | 2.67 |

|     |          |             |           |      |      |      |      |                 |                 |      |
|-----|----------|-------------|-----------|------|------|------|------|-----------------|-----------------|------|
|     |          | OncoSNP-Seq | 95.3      | 37.7 | 47.4 | 12.0 | 3830 | 63              | 2.67            |      |
|     |          | SoftSV      | 92.7      | 76.0 | 35.9 | 8.0  | 2    | 44              | 2.63            |      |
| DUP | All      | Wham        | 96.9      | 81.7 | 57.1 | 10.2 | 20   | 4               | 3.92            |      |
|     |          | SoftSV      | 84.2      | 67.8 | 47.3 | 14.3 | 181  | 44              | 3.91            |      |
|     |          | MATCHCLIP   | 87.6      | 77.5 | 58.0 | 9.9  | 427  | 6.5             | 3.79            |      |
|     |          | GRIDSS      | 91.1      | 77.9 | 58.4 | 9.6  | 15   | 17              | 3.78            |      |
|     |          | Manta       | 99.0      | 83.2 | 49.4 | 7.1  | 309  | 63              | 3.35            |      |
|     |          | SvABA       | 94.8      | 76.0 | 40.4 | 6.5  | 40   | 23              | 3.02            |      |
|     |          | MetaSV      | 82.6      | 69.6 | 42.7 | 7.2  | 2531 | 1* <sup>5</sup> | 3.02            |      |
|     |          | Pindel      | 86.3      | 71.1 | 31.3 | 5.2  | 25   | 196             | 2.57            |      |
|     |          | Lumpy       | 96.1      | 81.1 | 25.6 | 3.5  | 35   | 4               | 2.38            |      |
|     |          | DELLY       | 97.4      | 82.7 | 15.0 | 2.9  | 22   | 6               | 2.14            |      |
|     |          | S           | SvABA     | 73.3 | 59.2 | 42.1 | 9.1  | 1               | 23              | 4.54 |
|     |          |             | Manta     | 98.2 | 66.2 | 27.2 | 7.7  | 5               | 63              | 4.44 |
|     |          |             | Lumpy     | 76.0 | 62.8 | 41.2 | 7.9  | 2               | 4               | 4.43 |
|     |          |             | Pindel    | 67.6 | 55.4 | 38.7 | 9.5  | 1               | 196             | 4.37 |
|     |          |             | Sniffles  | 94.4 | 61.4 | 38.7 | 9.5  | 9               | 1.5             | 4.21 |
|     |          |             | SoftSV    | 47.5 | 59.2 | 26.0 | 15.8 | 1               | 44              | 4.21 |
|     |          |             | Wham      | 81.0 | 66.8 | 26.0 | 7.4  | 1               | 4               | 4.17 |
|     |          | M           | MetaSV    | 89.5 | 68.6 | 37.5 | 3.3  | 338             | 1* <sup>5</sup> | 3.68 |
|     |          |             | CNVnator  | 91.2 | 54.0 | 43.7 | 2.8  | 732             | 1               | 3.38 |
|     |          |             | forestSV  | 39.9 | 33.3 | 37.0 | 2.9  | 995             | 33              | 2.82 |
|     |          |             | ERDS      | 27.6 | 22.2 | 14.7 | 11.9 | 2216            | 25              | 2.67 |
|     |          |             | readDepth | 52.2 | 51.3 | 31.9 | 2.1  | 702             | 3.5             | 2.53 |
|     |          |             | DELLY     | 98.9 | 88.7 | 16.3 | 1.4  | 11              | 34              | 2.52 |
|     |          |             | iCopyDAV  | 56.9 | 45.6 | 19.3 | 2.8  | 1357            | 8.2             | 2.50 |
|     |          |             | GRIDSS    | 98.8 | 87.5 | 17.3 | 1.2  | 15              | 17              | 2.43 |
|     |          |             | Manta     | 99.4 | 83.1 | 19.5 | 1.0  | 6               | 63              | 2.30 |
|     |          |             | Lumpy     | 99.0 | 83.1 | 15.1 | 1.1  | 21              | 4               | 2.29 |
|     |          |             | Ulysses   | 83.1 | 78.4 | 9.9  | 2.0  | 37              | 11              | 2.29 |
|     |          | L           | CNVnator  | 91.5 | 85.8 | 48.6 | 13.8 | 3812            | 1               | 3.79 |
|     |          |             | ERDS      | 88.1 | 72.4 | 50.8 | 12.8 | 8482            | 25              | 3.63 |
|     | iCopyDAV |             | 85.9      | 70.7 | 67.1 | 8.7  | 4701 | 8.2             | 3.35            |      |
|     | MetaSV   |             | 94.5      | 84.3 | 35.6 | 13.2 | 4289 | 1* <sup>5</sup> | 3.33            |      |
|     | BICseq2  |             | 85.3      | 75.6 | 49.5 | 8.4  | 8541 | 7.7             | 3.09            |      |

|     |                    |             |      |      |                    |                      |      |      |      |
|-----|--------------------|-------------|------|------|--------------------|----------------------|------|------|------|
|     |                    | forestSV    | 89.5 | 36.5 | 59.7               | 7.3                  | 3492 | 33   | 2.67 |
|     |                    | readDepth   | 78.3 | 69.7 | 27.6               | 9.0                  | 8051 | 3.5  | 2.56 |
|     |                    | inGAP-sv    | 90.7 | 33.6 | 66.4               | 5.1                  | 1550 | 8    | 2.23 |
|     |                    | Pindel      | 98.6 | 88.0 | 12.6               | 3.7                  | 1    | 196  | 1.92 |
|     |                    | PennCNV-Seq | 85.6 | 76.2 | 28.0               | 3.0                  | 8408 | 72   | 1.92 |
| INS | Unspecified<br>INS | pbsv        | 89.7 | 38.2 | 72.7               | 27.5                 | 6    | 9.5  | 6.68 |
|     |                    | inGAP-sv    | 99.7 | 58.5 | 85.5               | 11.8                 | 22   | 8    | 6.27 |
|     |                    | Sniffles    | 74.8 | 52.5 | 65.9               | 9.0                  | 11   | 1.5  | 5.08 |
|     |                    | SVseq2      | 70.4 | 64.2 | 38.5               | 7.1                  | 4    | 34   | 4.84 |
|     |                    | PBHoney-NGM | 74.2 | 27.8 | 78.8               | 11.5                 | 141  | 8.5  | 4.43 |
|     |                    | BASIL-ANISE | 60.3 | 46.0 | 45.5               | 8.6                  | 13   | 4    | 4.34 |
|     |                    | Manta       | 96.5 | 11.9 | 79.1               | 8.6                  | 1    | 63   | 2.94 |
|     | MEI                | MELT        | 99.7 | 68.9 | 88.9               | (85.6) <sup>*4</sup> | 6    | 8    | 3.21 |
|     |                    | Mobster     | 100  | 67.1 | 88.3               | (71.9) <sup>*4</sup> | 9    | 4.5  | 3.04 |
|     | NUMT               | MELT-numt   | 100  | 20.0 | 92.3               | (33) <sup>*4</sup>   | 10   | 8    | 2.57 |
| VEI | Mobster-vei        | 98.0        | 100  | 25.2 | (60) <sup>*4</sup> | 1                    | 4.5  | 1.96 |      |
| INV | ALL                | DELLY       | 94.7 | 81.8 | 38.9               | 15.6                 | 15   | 34   | 3.07 |
|     |                    | TIDDIT      | 89.2 | 77.9 | 49.1               | 11.7                 | 145  | 3.5  | 2.89 |
|     |                    | 1-2-3-SV    | 70.7 | 81.2 | 31.8               | 14.8                 | 254  | 32   | 2.67 |
|     |                    | GRIDSS      | 96.6 | 84.7 | 34.2               | 10.4                 | 30   | 17   | 2.67 |
|     |                    | Manta       | 97.6 | 80.9 | 27.5               | 12.8                 | 6    | 63   | 2.65 |
|     |                    | Pindel      | 89.9 | 78.3 | 29.3               | 11.4                 | 2256 | 196  | 2.55 |
|     |                    | inGAP-sv    | 99.0 | 69.2 | 31.8               | 10.0                 | 23   | 8    | 2.47 |
|     |                    | PRISM       | 96.5 | 81.2 | 34.3               | 8.3                  | 1937 | 53   | 2.47 |

<sup>\*1</sup> Root mean square error of breakpoints determined by the algorithms for the Sim-A data.

<sup>\*2</sup> Time (minute) spent on a run with 30× read data (10× for long reads) for chromosome 8 using a single CPU.

<sup>\*3</sup> Sum of normalized F-measures of the simulated and the real data. Normalized F-measure = F-measure/the mean F-measure for the corresponding category.

<sup>\*4</sup> Provisional recall value: the number of true positives was calculated by dividing by the provisional number of reference MEIs, NUMTs, and VEIs (1,350, 15, and 10, respectively) which were estimated with the data from the 1000 Genome project.

<sup>\*5</sup> Run time without the time spent on Pindel, BreakDancer, CNVnator, and BreakSeq2.



**Table S20.** List of poor performing algorithms that cannot be recommended for SV detection with human WGS data

| Algorithms                 | Comments                                                                                                                                                                                                                                                                            |
|----------------------------|-------------------------------------------------------------------------------------------------------------------------------------------------------------------------------------------------------------------------------------------------------------------------------------|
| Breakway                   | Run time is extremely long.                                                                                                                                                                                                                                                         |
| indelMINER                 | Precision and recall are low. This algorithm can detect only DELs.                                                                                                                                                                                                                  |
| MindTheGap                 | Precision and recall are low despite of long runtime and high memory consumption.                                                                                                                                                                                                   |
| VirusSeq                   | Precision and recall are low despite of long runtime and high memory consumption.                                                                                                                                                                                                   |
| AS-GENSENG,<br>OncoSNP-Seq | Their precision and recall are low. However, these algorithms may more effectively and accurately detect somatic CNVs or germline CNVs from whole exome sequencing data. The use of CNVnator, PennCNV-Seq, or readDepth is recommended if read depth-based algorithms are selected. |

## References

1. Wang W, Wang W, Sun W, Crowley JJ, Szatkiewicz JP. Allele-specific copy-number discovery from whole-genome and whole-exome sequencing. *Nucleic Acids Res.* 2015;43:e90.
2. Holtgrewe M, Kuchenbecker L, Reinert K. Methods for the detection and assembly of novel sequence in high-throughput sequencing data. *Bioinformatics.* 2015;31:1904-12.
3. Tennakoon C, Sung WK. BATVI: Fast, sensitive and accurate detection of virus integrations. *BMC Bioinformatics.* 2017;18:71.
4. Xi R, Lee S, Xia Y, Kim TM, Park PJ. Copy number analysis of whole-genome data using BIC-seq2 and its application to detection of cancer susceptibility variants. *Nucleic Acids Res.* 2016;44:6274-86.
5. Chen K, Wallis JW, McLellan MD, Larson DE, Kalicki JM, Pohl CS, et al. BreakDancer: an algorithm for high-resolution mapping of genomic structural variation. *Nat Methods.* 2009;6:677-81.
6. Zhao H, Zhao F. BreakSeek: a breakpoint-based algorithm for full spectral range INDEL detection. *Nucleic Acids Res.* 2015;43:6701-13.
7. Lam HY, Mu XJ, Stutz AM, Tanzer A, Cayting PD, Snyder M, et al. Nucleotide-resolution analysis of structural variants using BreakSeq and a breakpoint library. *Nat Biotechnol.* 2010;28:47-55.
8. Clark MJ, Homer N, O'Connor BD, Chen Z, Eskin A, Lee H, et al. U87MG decoded: the genomic sequence of a cytogenetically aberrant human cancer cell line. *PLoS Genet.* 2010;6:e1000832.
9. Marschall T, Costa IG, Canzar S, Bauer M, Klau GW, Schliep A, et al. CLEVER: clique-enumerating variant finder. *Bioinformatics.* 2012;28:2875-82.
10. Abyzov A, Urban AE, Snyder M, Gerstein M. CNVnator: an approach to discover, genotype, and characterize typical and atypical CNVs from family and population genome sequencing. *Genome Res.* 2011;21:974-84.
11. Boeva V, Popova T, Bleakley K, Chiche P, Cappo J, Schleiermacher G, et al. Control-FREEC: a tool for assessing copy number and allelic

- content using next-generation sequencing data. *Bioinformatics*. 2012;28:423-5.
12. Wang J, Mullighan CG, Easton J, Roberts S, Heatley SL, Ma J, et al. CREST maps somatic structural variation in cancer genomes with base-pair resolution. *Nat Methods*. 2011;8:652-4.
  13. Rausch T, Zichner T, Schlattl A, Stutz AM, Benes V, Korbel JO. DELLY: structural variant discovery by integrated paired-end and split-read analysis. *Bioinformatics*. 2012;28:i333-i9.
  14. Ebler J, Schonhuth A, Marschall T. Genotyping inversions and tandem duplications. *Bioinformatics*. 2017;33:4015-23.
  15. Dayama G, Emery SB, Kidd JM, Mills RE. The genomic landscape of polymorphic human nuclear mitochondrial insertions. *Nucleic Acids Res*. 2014;42:12640-9.
  16. Zhu M, Need AC, Han Y, Ge D, Maia JM, Zhu Q, et al. Using ERDS to infer copy-number variants in high-coverage genomes. *Am J Hum Genet*. 2012;91:408-21.
  17. Li H. FermiKit: assembly-based variant calling for Illumina resequencing data. *Bioinformatics*. 2015;31:3694-6.
  18. Michaelson JJ, Sebat J. forestSV: structural variant discovery through statistical learning. *Nat Methods*. 2012;9:819-21.
  19. Sindi SS, Onal S, Peng LC, Wu HT, Raphael BJ. An integrative probabilistic model for identification of structural variation in sequencing data. *Genome Biol*. 2012;13:R22.
  20. Handsaker RE, Korn JM, Nemesh J, McCarroll SA. Discovery and genotyping of genome structural polymorphism by sequencing on a population scale. *Nat Genet*. 2011;43:269-76.
  21. Cameron DL, Schroder J, Penington JS, Do H, Molania R, Dobrovic A, et al. GRIDSS: sensitive and specific genomic rearrangement detection using positional de Bruijn graph assembly. *Genome Res*. 2017;27:2050-60.
  22. Baheti S, Tang X, O'Brien DR, Chia N, Roberts LR, Nelson H, et al. HGT-ID: an efficient and sensitive workflow to detect human-viral insertion sites using next-generation sequencing data. *BMC*

- Bioinformatics. 2018;19:271.
23. Quinlan AR, Clark RA, Sokolova S, Leibowitz ML, Zhang Y, Hurles ME, et al. Genome-wide mapping and assembly of structural variant breakpoints in the mouse genome. *Genome Res.* 2010;20:623-35.
  24. Dharanipragada P, Vogeti S, Parekh N. iCopyDAV: Integrated platform for copy number variations-Detection, annotation and visualization. *PLoS One.* 2018;13:e0195334.
  25. Ratan A, Olson TL, Loughran TP, Jr., Miller W. Identification of indels in next-generation sequencing data. *BMC Bioinformatics.* 2015;16:42.
  26. Qi J, Zhao F. inGAP-sv: a novel scheme to identify and visualize structural variation from paired end mapping data. *Nucleic Acids Res.* 2011;39:W567-75.
  27. Jiang C, Chen C, Huang Z, Liu R, Verdier J. ITIS, a bioinformatics tool for accurate identification of transposon insertion sites using next-generation sequencing data. *BMC Bioinformatics.* 2015;16:72.
  28. Zhuang J, Weng Z. Local sequence assembly reveals a high-resolution profile of somatic structural variations in 97 cancer genomes. *Nucleic Acids Res.* 2015;43:8146-56.
  29. Layer RM, Chiang C, Quinlan AR, Hall IM. LUMPY: a probabilistic framework for structural variant discovery. *Genome Biol.* 2014;15:R84.
  30. Chen X, Schulz-Trieglaff O, Shaw R, Barnes B, Schlesinger F, Kallberg M, et al. Manta: rapid detection of structural variants and indels for germline and cancer sequencing applications. *Bioinformatics.* 2016;32:1220-2.
  31. Wu Y, Tian L, Pirastu M, Stambolian D, Li H. MATCHCLIP: locate precise breakpoints for copy number variation using CIGAR string by matching soft clipped reads. *Front Genet.* 2013;4:157.
  32. Yang L, Luquette LJ, Gehlenborg N, Xi R, Haseley PS, Hsieh CH, et al. Diverse mechanisms of somatic structural variations in human cancer genomes. *Cell.* 2013;153:919-29.
  33. Gardner EJ, Lam VK, Harris DN, Chuang NT, Scott EC, Pittard WS, et al. The Mobile Element Locator Tool (MELT): population-scale

- mobile element discovery and biology. *Genome Res.* 2017.
34. Mohiyuddin M, Mu JC, Li J, Bani Asadi N, Gerstein MB, Abyzov A, et al. MetaSV: an accurate and integrative structural-variant caller for next generation sequencing. *Bioinformatics.* 2015;31:2741-4.
  35. Rizk G, Gouin A, Chikhi R, Lemaitre C. MindTheGap: integrated detection and assembly of short and long insertions. *Bioinformatics.* 2014;30:3451-7.
  36. Thung DT, de Ligt J, Vissers LE, Steehouwer M, Kroon M, de Vries P, et al. Mobster: accurate detection of mobile element insertions in next generation sequencing data. *Genome Biol.* 2014;15:488.
  37. Yau C. OncoSNP-SEQ: a statistical approach for the identification of somatic copy number alterations from next-generation sequencing of cancer genomes. *Bioinformatics.* 2013;29:2482-4.
  38. Kavak P, Lin YY, Numanagic I, Asghari H, Gungor T, Alkan C, et al. Discovery and genotyping of novel sequence insertions in many sequenced individuals. *Bioinformatics.* 2017;33:i161-i9.
  39. English AC, Salerno WJ, Reid JG. PBHoney: identifying genomic variants via long-read discordance and interrupted mapping. *BMC Bioinformatics.* 2014;15:180.
  40. de Araujo Lima L, Wang K. PennCNV in whole-genome sequencing data. *BMC Bioinformatics.* 2017;18:383.
  41. Ye K, Schulz MH, Long Q, Apweiler R, Ning Z. Pindel: a pattern growth approach to detect break points of large deletions and medium sized insertions from paired-end short reads. *Bioinformatics.* 2009;25:2865-71.
  42. Kehr B, Melsted P, Halldorsson BV. PopIns: population-scale detection of novel sequence insertions. *Bioinformatics.* 2016;32:961-7.
  43. Jiang Y, Wang Y, Brudno M. PRISM: pair-read informed split-read mapping for base-pair level detection of insertion, deletion and structural variants. *Bioinformatics.* 2012;28:2576-83.
  44. Bickhart DM, Hutchison JL, Xu L, Schnabel RD, Taylor JF, Reecy JM, et al. RAPTR-SV: a hybrid method for the detection of structural variants. *Bioinformatics.* 2015;31:2084-90.

45. Miller CA, Hampton O, Coarfa C, Milosavljevic A. ReadDepth: a parallel R package for detecting copy number alterations from short sequencing reads. *PLoS One*. 2011;6:e16327.
46. Keane TM, Wong K, Adams DJ. RetroSeq: transposable element discovery from next-generation sequencing data. *Bioinformatics*. 2013;29:389-90.
47. Sedlazeck FJ, Rescheneder P, Smolka M, Fang H, Nattestad M, von Haeseler A, et al. Accurate detection of complex structural variations using single-molecule sequencing. *Nat Methods*. 2018.
48. Schroder J, Hsu A, Boyle SE, Macintyre G, Cmero M, Tothill RW, et al. Socrates: identification of genomic rearrangements in tumour genomes by re-aligning soft clipped reads. *Bioinformatics*. 2014.
49. Hart SN, Sarangi V, Moore R, Baheti S, Bhavsar JD, Couch FJ, et al. SoftSearch: integration of multiple sequence features to identify breakpoints of structural variations. *PLoS One*. 2013;8:e83356.
50. Bartenhagen C, Dugas M. Robust and exact structural variation detection with paired-end and soft-clipped alignments: SoftSV compared with eight algorithms. *Brief Bioinform*. 2016;17:51-62.
51. Kim J, Kim S, Nam H, Kim S, Lee D. SoloDel: a probabilistic model for detecting low-frequent somatic deletions from unmatched sequencing data. *Bioinformatics*. 2015;31:3105-13.
52. Zhang Z, Wang J, Luo J, Ding X, Zhong J, Wang J, et al. Sprites: detection of deletions from sequencing data by re-aligning split reads. *Bioinformatics*. 2016;32:1788-96.
53. Antaki D, Brandler WM, Sebat J. SV2: Accurate Structural Variation Genotyping and De Novo Mutation Detection from Whole Genomes. *Bioinformatics*. 2017.
54. Wala JA, Bandopadhyay P, Greenwald NF, O'Rourke R, Sharpe T, Stewart C, et al. SvABA: genome-wide detection of structural variants and indels by local assembly. *Genome Res*. 2018;28:581-91.
55. Zeitouni B, Boeva V, Janoueix-Lerosey I, Loeillet S, Legoix-ne P, Nicolas A, et al. SVDetect: a tool to identify genomic structural variations from paired-end and mate-pair sequencing data.

- Bioinformatics. 2010;26:1895-6.
56. Zhao X, Emery SB, Myers B, Kidd JM, Mills RE. Resolving complex structural genomic rearrangements using a randomized approach. *Genome Biol.* 2016;17:126.
  57. Yang R, Chen L, Newman S, Gandhi K, Doho G, Moreno CS, et al. Integrated analysis of whole-genome paired-end and mate-pair sequencing data for identifying genomic structural variations in multiple myeloma. *Cancer Inform.* 2014;13:49-53.
  58. Zhang J, Wang J, Wu Y. An improved approach for accurate and efficient calling of structural variations with low-coverage sequence data. *BMC Bioinformatics.* 2012;13 Suppl 6:S6.
  59. Wu J, Lee WP, Ward A, Walker JA, Konkel MK, Batzer MA, et al. Tangram: a comprehensive toolbox for mobile element insertion detection. *BMC Genomics.* 2014;15:795.
  60. Lee E, Iskow R, Yang L, Gokcumen O, Haseley P, Luquette LJ, 3rd, et al. Landscape of somatic retrotransposition in human cancers. *Science.* 2012;337:967-71.
  61. Zhuang J, Wang J, Theurkauf W, Weng Z. TEMP: a computational method for analyzing transposable element polymorphism in populations. *Nucleic Acids Res.* 2014;42:6826-38.
  62. Eisfeldt J, Vezzi F, Olason P, Nilsson D, Lindstrand A. TIDDIT, an efficient and comprehensive structural variant caller for massive parallel sequencing data. *F1000Res.* 2017;6:664.
  63. Gillet-Markowska A, Richard H, Fischer G, Lafontaine I. Ulysses: accurate detection of low-frequency structural variations in large insert-size sequencing libraries. *Bioinformatics.* 2015;31:801-8.
  64. Hormozdiari F, Alkan C, Eichler EE, Sahinalp SC. Combinatorial algorithms for structural variation detection in high-throughput sequenced genomes. *Genome Res.* 2009;19:1270-8.
  65. Wang Q, Jia P, Zhao Z. VERSE: a novel approach to detect virus integration in host genomes through reference genome customization. *Genome Med.* 2015;7:2.
  66. Chen Y, Yao H, Thompson EJ, Tannir NM, Weinstein JN, Su X.

- VirusSeq: software to identify viruses and their integration sites using next-generation sequencing of human cancer tissue. *Bioinformatics*. 2013;29:266-7.
67. Kronenberg ZN, Osborne EJ, Cone KR, Kennedy BJ, Domyan ET, Shapiro MD, et al. Wham: Identifying Structural Variants of Biological Consequence. *PLoS Comput Biol*. 2015;11:e1004572.
  68. David M, Mustafa H, Brudno M. Detecting Alu insertions from high-throughput sequencing data. *Nucleic Acids Res*. 2013;41:e169.
  69. Trappe K, Emde AK, Ehrlich HC, Reinert K. Gustaf: Detecting and correctly classifying SVs in the NGS twilight zone. *Bioinformatics*. 2014;30:3484-90.
  70. Linheiro RS, Bergman CM. Whole genome resequencing reveals natural target site preferences of transposable elements in *Drosophila melanogaster*. *PLoS One*. 2012;7:e30008.
  71. Korbelt JO, Abyzov A, Mu XJ, Carriero N, Cayting P, Zhang Z, et al. PEMer: a computational framework with simulation-based error models for inferring genomic structural variants from massive paired-end sequencing data. *Genome Biol*. 2009;10:R23.
  72. Escaramis G, Tornador C, Bassaganyas L, Rabionet R, Tubio JM, Martinez-Fundichely A, et al. PeSV-Fisher: identification of somatic and non-somatic structural variants using next generation sequencing data. *PLoS One*. 2013;8:e63377.
  73. Robb SM, Lu L, Valencia E, Burnette JM, 3rd, Okumoto Y, Wessler SR, et al. The use of RelocaTE and unassembled short reads to produce high-resolution snapshots of transposable element generated diversity in rice. *G3 (Bethesda)*. 2013;3:949-57.
  74. Yoon S, Xuan Z, Makarov V, Ye K, Sebat J. Sensitive and accurate detection of copy number variants using read depth of coverage. *Genome Res*. 2009;19:1586-92.
  75. Platzer A, Nizhynska V, Long Q. TE-Locate: A Tool to Locate and Group Transposable Element Occurrences Using Paired-End Next-Generation Sequencing Data. *Biology (Basel)*. 2012;1:395-410.
  76. Gilly A, Etcheverry M, Madoui MA, Guy J, Quadrana L, Alberti A, et



al. TE-Tracker: systematic identification of transposition events through whole-genome resequencing. *BMC Bioinformatics*. 2014;15:377.

77. Sudmant PH, Rausch T, Gardner EJ, Handsaker RE, Abyzov A, Huddleston J, et al. An integrated map of structural variation in 2,504 human genomes. *Nature*. 2015;526:75-81.
